# Supplementary material for: Cofactor-free ActVA-Orf6 monooxygenase catalysisviaproton-coupled electron transfer: a QM/MM study
Source: Royal Society of Chemistry journal article supplement (doi:10.1039/d2ob00848c), 2022-01-01
Supplement: d2ob00848c1.pdf [file d2ob00848c1.pdf]

## *Supporting Information for*

### **Cofactor-free ActVA-Orf6 monooxygenase catalysis via proton-coupled electron transfer: A QM/MM study**

Xue Li,<sup>a</sup> Xing Li,<sup>b</sup> Qiaoyu Zhang,<sup>c</sup> Peng Lv,<sup>a</sup> Yu Jia,<sup>\*a</sup> Donghui Wei<sup>\*c</sup>

<sup>a</sup>Key Laboratory for Special Functional Materials of Ministry of Education, School of Materials and Engineering, Henan University, Kaifeng 475001, China

<sup>b</sup>Department of Traditional Chinese Medicine, Zhujiang Hospital, Southern Medical University, Guangzhou, Guangdong 510280, China

<sup>c</sup>College of Chemistry, Institute of Green Catalysis, Zhengzhou University, 100 Science Avenue, Zhengzhou, Henan 450001, China

E-mail: jiaYu@henu.edu.cn; donghuiwei@zzu.edu.cn.

### **Table of Contents**

|    |                                                                                  |    |
|----|----------------------------------------------------------------------------------|----|
| 1. | Computational details .....                                                      | S1 |
| 2. | MD/QM/MM simulation results.....                                                 | S1 |
|    | 2.1 Hydrogen-bonding interactions between the substrate and residues .....       | S1 |
|    | 2.2 The possible path B associated with SET process.....                         | S3 |
|    | 2.3 IRC analyses of all the transition states .....                              | S3 |
|    | 2.3 Test results of computational methods .....                                  | S5 |
| 3  | Cartesian coordinates and energy values of optimized structures .....            | S6 |
|    | 3.1 Relative energies of the optimized structures by DFT .....                   | S6 |
|    | 3.2 The Cartesian coordinates of QM- and QM/MM-optimized stationary points ..... | S7 |

## 1. Computational details

The experimental investigations on the steady-state kinetic properties indicated that the oxidation of phenols to quinones catalyzed ActVA-Orf6 monooxygenase was performed at 303.15 K (30 °C) and gives the reaction rate constant value of  $k_{\text{cat}} = 4.17 * 10^{-2} \text{ s}^{-1}$ . The reaction rate constant can be used to estimate the free energy barrier ( $\Delta G^\ddagger$ ) of the whole enzymic oxygenation reaction, whose value was calculated based on the classical transition state theory with the following equation:

$$k_{\text{cat}} = \nu \exp(-\Delta G^\ddagger / RT) \quad (1)$$

where  $\nu$  is the frequency factor and computes by the equation of  $\nu = k_B T / h$ , in which  $k_B$  is the Boltzmann constant,  $h$  is the Planck constant, and  $T$  is the temperature. In equation (1), the free energy barrier ( $\Delta G^\ddagger$ ) refers to the free energy barrier of the whole catalytic reaction. On the basis of equation (1), the free energy barrier is computed as follows:

$$\Delta G^\ddagger = -RT \ln\left(\frac{k_{\text{cat}}}{\nu}\right) \quad (2)$$

According to the relationship of the free energy barrier ( $\Delta G^\ddagger$ ) with its experimental reaction rate constant  $k_{\text{cat}} = 4.17 * 10^{-2} \text{ s}^{-1}$  in equation (2), the estimated free energy barrier is equal to 19.7 kcal/mol. The value of our calculated energy barrier of 20.7 kcal/mol is very close to the energy barrier (19.7 kcal/mol) estimated by experiments, thus indicating that our calculation results are reasonable and reliable.

## 2. MD/QM/MM simulation results

### 2.1 Hydrogen-bonding interactions between the substrate and residues

From **Figure 2**, we know that the dominant electrostatic interactions of the sidechains of residues Asn62, Trp66, and Arg86 are existing during the MD simulations. To figure out whether the dominant electrostatic interactions are hydrogen-bonding interactions, the distances of the possible hydrogen bonds were tracked over the entire MD simulations. It can be seen from **Figs. S1-2** that the hydrogen bond of Trp66@N $\epsilon$ -H $\epsilon$ ...O8@DDHK<sup>-</sup> are always existing over the whole MD simulations; while the two hydrogen bonds of Arg86@N $\epsilon$ -H $\epsilon$ ...O15@DDHK<sup>-</sup> and Arg86@N $\eta$ -H $\eta$ ...O16@DDHK<sup>-</sup> were formed after about 40 ns MD simulation times, and they are stably existing over the following MD equilibrium simulations (about 80 ns), indicating that the substrate can be stabilized by forming hydrogen-bonding interactions with the two residues Trp66 and Arg86. Obviously, the angles for the Trp66@N $\epsilon$ -H $\epsilon$ ...O8@DDHK<sup>-</sup>, Arg86@N $\epsilon$ -H $\epsilon$ ...O15@DDHK<sup>-</sup>, and Arg86@N $\eta$ -H $\eta$ ...O16@DDHK<sup>-</sup> are separately floated around 150°, 138°, and 138°, while their corresponding distances are floated around 3.0, 3.5, and 3.5 Å, respectively. All the analyses demonstrated that DDHK<sup>-</sup> is well anchored at the binding site

of the ActVA-Orf6 enzyme.

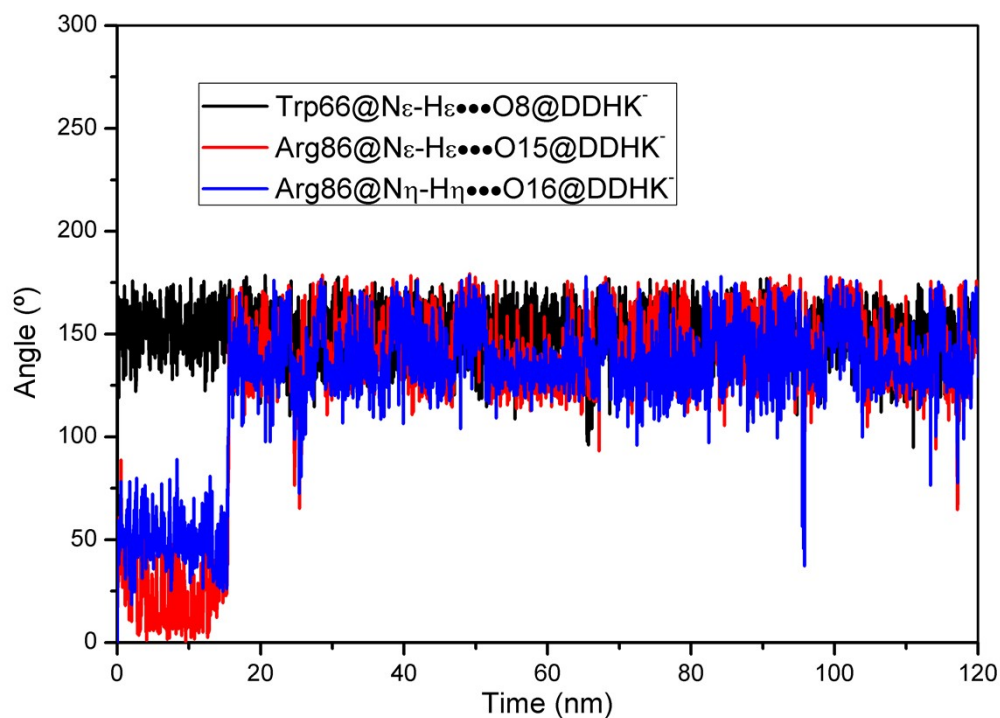

**Fig. S1** Angles for the three hydrogen bonds between substrate  $\text{DDHK}^-$  and residues Trp66 and Arg86 related to the corresponding starting structures for the entire MD simulations (unit:  $^\circ$ ).

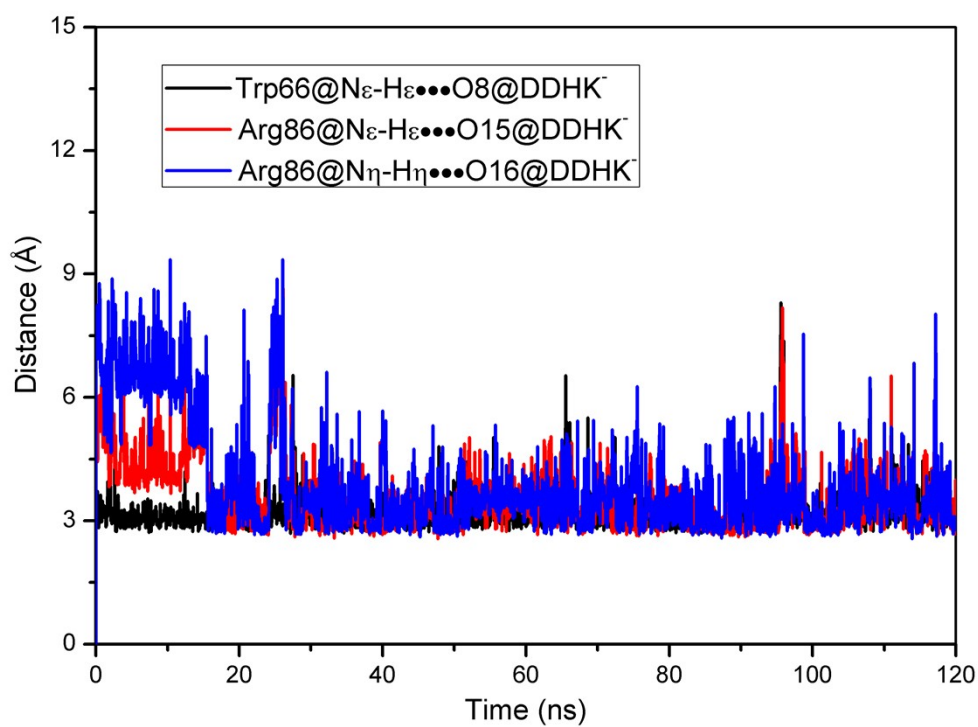

**Fig. S2** Distances for the three hydrogen bonds between substrate  $\text{DDHK}^-$  and residues Trp66 and Arg86 related to the corresponding starting structures for the entire MD simulation (unit:  $\text{\AA}$ ).

## 2.2 The possible path B associated with SET process

Since the substrate is identified to exist in a negative deprotonated state in the active center of enzyme catalysis, it is likely to occur an intermolecular single electron transfer (SET) process, monooxygenation reaction, or dioxygenation reaction for substrate **DDHK<sup>-</sup>** with triplet O<sub>2</sub>. As shown in **Scheme S1**, the relative Gibbs free energy for the SET process, monooxygenation reaction, and dioxygenation reaction are 53.3, -78.7, and 22.8 kcal/mol, respectively, in the QM computational modeling, indicating the endothermic dioxygenation reaction associated with endothermic SET process is impossible to happen under experimental condition. Meanwhile, the relative energy (19.7 kcal/mol, see **Table S2**) of dioxygenation product **<sup>1</sup>SP** is extremely higher than that (-103.5 kcal/mol, see **Table S2**) of monooxygenation product **<sup>1</sup>EP** in the QM/MM computational modeling, meaning that monooxygenation product **<sup>1</sup>EP** is more energetically preferred in both thermodynamics and dynamics. Thereby, the possible **path B** associated with the SET process for the production of dioxygenation product is unnecessary to investigate and calculate in detail for the QM/MM calculations.

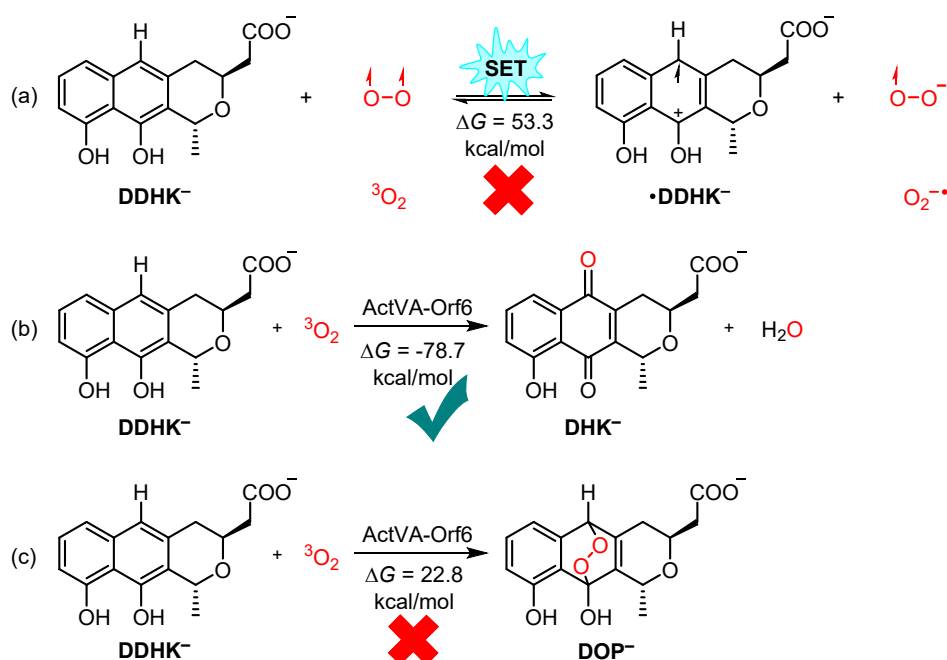

**Scheme S1.** (a) The possible intermolecular single electron transfer process for substrate **DDHK<sup>-</sup>** associated with the related thermodynamic data. ActVA-Orf6 catalyzed oxidation reaction affording (b) monooxygenation product **DHK<sup>-</sup>** rather than (c) deoxygenation product **DOP<sup>-</sup>**. All the above structures are computed at the level B3LYP/6-31G(d,p)/CPCM<sub>water</sub> of theory (energy unit: kcal/mol).

## 2.3 IRC analyses of all the transition states

To ensure whether the transition states can connect their relevant reactants and products, the intrinsic reaction coordinate (IRC) calculations have been conducted for the energetically favorable **path A** including the proton transfer accompanied by electron transfer (PCET), diradical complexation, and dehydration processes. As suggested by the calculated IRC results in **Figs. S3-5**, the energy differences between all the IRC-TSS/products and IRC-reactants in the scanning diagram of open-shell triplet transition state  ${}^3\text{TS1}$ , open-shell singlet transition state  ${}^{\text{OS}}\text{TS2}$ , and closed-shell singlet transition state  ${}^1\text{TS3}$  are very close to their corresponding values in energy profiles **Figure 8**. In addition, all the 3D-structures in **Figures 3, 5, 7** revealed that the transition states  ${}^3\text{TS1}/{}^{\text{OS}}\text{TS2}/{}^1\text{TS3}$  are indeed connecting their reactants and products, respectively. In other words, the  ${}^3\text{ES0}$ ,  ${}^3\text{TS1}$ , and  ${}^3\text{M1}$  are in the same conformational space, the same conclusion can be obtained in comparisons of the  ${}^{\text{OS}}\text{M1}/{}^{\text{OS}}\text{TS2}/{}^1\text{M2}$  and  ${}^1\text{TS3}/{}^1\text{EP}$  conformations.

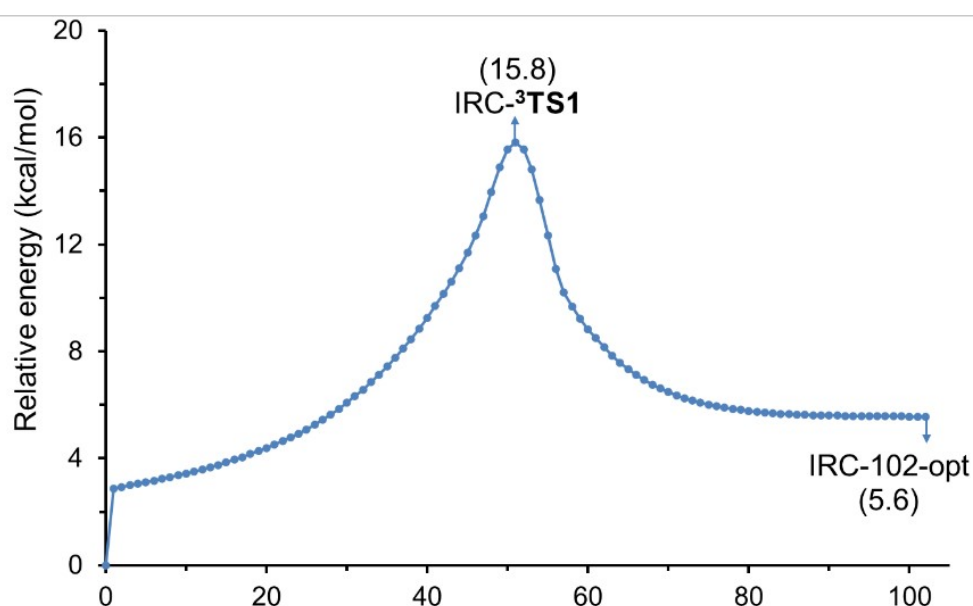

**Fig. S3** The IRC results of open-shell triplet transition state  ${}^3\text{TS1}$  calculated at the ONIOM[B3LYP/6-31G(d,p):AMBER] theory level (unit: kcal/mol).

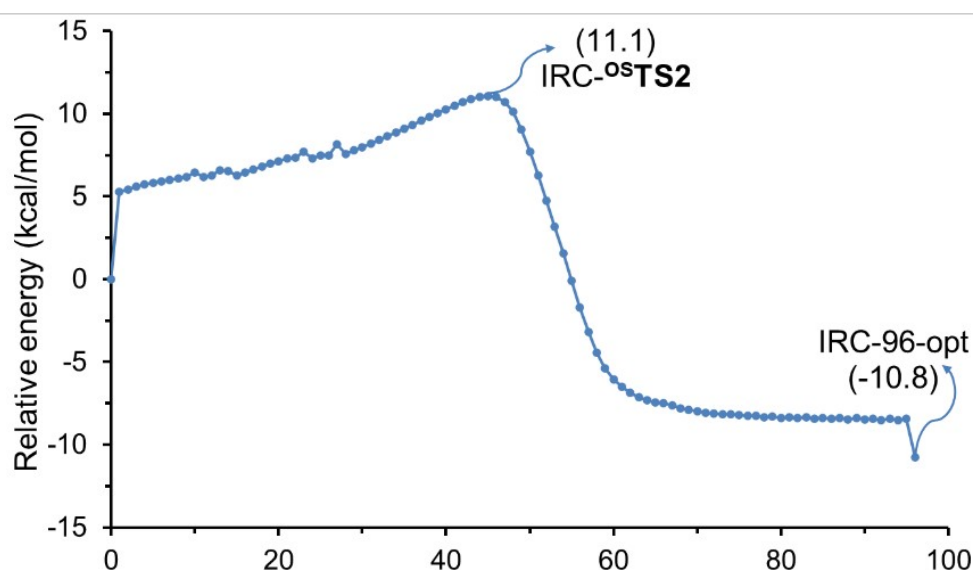

**Fig. S4** The IRC results of open-shell singlet transition state <sup>0</sup>TS2 calculated at the ONIOM[UB3LYP/6-31G(d,p):AMBER] theory level (unit: kcal/mol).

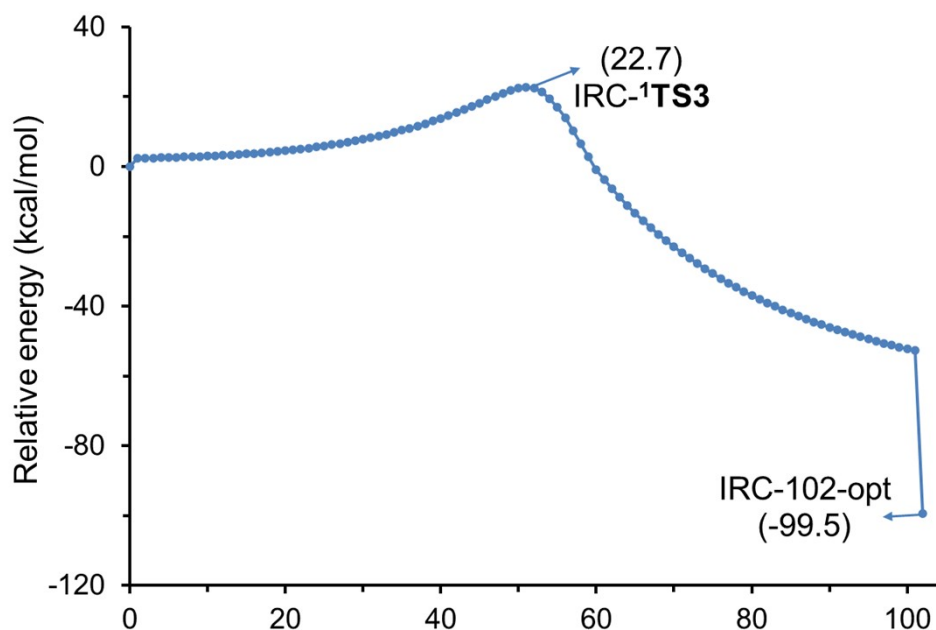

**Fig. S5** The IRC results of closed-shell singlet transition state <sup>1</sup>TS3 calculated at the ONIOM[B3LYP/6-31G(d,p):AMBER] theory level (unit: kcal/mol).

## 2.4 Test results of computational methods

To check whether the aforementioned calculation method (*i.e.*, B3LYP) and level (*i.e.*, L1 level) can obtain reliable results, we additionally performed calculations on the key transition states of the diradical complexation and dehydration steps by using other DFT methods (such as, M06-2X-D3, B3PW91-D3, and B3LYP-D3) at different levels. The calculated results are summarized in **Tables S1-2**. Apparently, the relative energy barriers *via* transition states <sup>0</sup>TS2/<sup>1</sup>TS3 computed at the computational levels of L2~L4/L3~L4 are close to those (10.6/20.7 kcal/mol) computed at the L1 level. Thus, the selected computational method and level should be reliable for the studied system in this work.

**Table S1.** Comparisons of the relative energies for selected stationary points at different computational levels Ln = L1~L4 (Unit: kcal/mol)

| Level            | L1   | L2   | L3   | L4   |
|------------------|------|------|------|------|
| <sup>0</sup> SM1 | 0.0  | 0.0  | 0.0  | 0.0  |
| <sup>0</sup> TS2 | 10.6 | 11.8 | 10.1 | 10.8 |

L1: ONIOM[B3LYP-D3/6-311++G(2df,2pd):AMBER]/ONIOM[B3LYP/6-31G(d,p):AMBER];  
L2: ONIOM[M06-2X-D3/6-311++G(2df,2pd):AMBER]/ONIOM[B3LYP/6-31G(d,p):AMBER];  
L3: ONIOM[B3PW91-D3/6-311++G(2df,2pd):AMBER]/ONIOM[B3LYP/6-31G(d,p):AMBER];  
L4: ONIOM[B3LYP-D3/6-311++G(2df,2pd):AMBER]/ONIOM[B3LYP-D3/6-31G(d,p):AMBER].

**Table S2.** Comparisons of the relative energies for selected stationary points at different computational levels  $L_n = L1, L3\sim L4$  (Unit: kcal/mol)

| Level                  | L1   | L3   | L4   |
|------------------------|------|------|------|
| <b><sup>1</sup>M2</b>  | 0.0  | 0.0  | 0.0  |
| <b><sup>1</sup>TS3</b> | 20.7 | 19.2 | 20.4 |

L1: ONIOM[B3LYP-D3/6-311++G(2df,2pd):AMBER]//ONIOM[B3LYP/6-31G(d,p):AMBER];  
L3: ONIOM[B3PW91-D3/6-311++G(2df,2pd):AMBER]//ONIOM[B3LYP/6-31G(d,p):AMBER];  
L4: ONIOM[B3LYP-D3/6-311++G(2df,2pd):AMBER]//ONIOM[B3LYP-D3/6-31G(d,p):AMBER].

**Table S3.** Comparisons of the relative energy barriers and entropic changes of the three processes calculated at the L1 level of theory (Unit: kcal/mol)

|                                         | $\Delta AE$ | $\Delta AG$ | $-TAS$ |
|-----------------------------------------|-------------|-------------|--------|
| <b><sup>3</sup>TS1-<sup>3</sup>ES0</b>  | 15.5        | 16.9        | 2.9    |
| <b><sup>0S</sup>TS2-<sup>0S</sup>M1</b> | 10.6        | 12.5        | 2.9    |
| <b><sup>1</sup>TS3-<sup>1</sup>M2</b>   | 20.7        | 21.0        | 0.6    |

### 3 Cartesian coordinates and energy values of optimized structures

#### 3.1 Relative energies of the optimized structures by DFT

**Table S4.** The single-point energies (SPE), zero-point correction (ZPC), zero-point correction energies (ZPE=SPE+ZPC), and relative energies ( $\Delta E$ ) of the stationary points involved in the enzyme catalytic cycle, which are computed at the ONIOM[(U)B3LYP-D3/6-311++G(2df,2pd):AMBER]//ONIOM[(U)B3LYP/6-31G(d,p):AMBER] theory level.

|                         | SPE (a.u.)    | ZPC (a.u.) | ZPE (a.u.)    | $\Delta E$ (kcal/mol) |
|-------------------------|---------------|------------|---------------|-----------------------|
| <b><sup>3</sup>ES0</b>  | -2190.8980915 | 5.5581410  | -2185.3399505 | 0.0                   |
| <b><sup>3</sup>TS1</b>  | -2190.8680115 | 5.5527580  | -2185.3152535 | 15.5                  |
| <b><sup>3</sup>M1</b>   | -2190.8854007 | 5.5585000  | -2185.3269007 | 8.2                   |
| <b><sup>0S</sup>M1</b>  | -2190.8853291 | 5.5584380  | -2185.3268911 | 8.2                   |
| <b><sup>0S</sup>TS2</b> | -2190.8721544 | 5.5621820  | -2185.3099724 | 18.8                  |
| <b><sup>1</sup>M2</b>   | -2190.9036590 | 5.5630270  | -2185.3406320 | -0.4                  |
| <b><sup>1</sup>TS3</b>  | -2190.8627150 | 5.5551620  | -2185.3075530 | 20.3                  |
| <b><sup>1</sup>EP</b>   | -2191.0668933 | 5.5620730  | -2185.5048203 | -103.5                |
| <b><sup>1</sup>SP</b>   | -2190.8980915 | 5.5645380  | -2185.3085265 | 19.7                  |

**Table S5.** The single-point energies (SPE), Gibbs free energy correction (GFEC), Gibbs free energies (GFE=SPE+GFEC), entropy parameters (TAS), and relative Gibbs free energies ( $\Delta\Delta G$ ) of the stationary points involved in the enzyme catalytic cycle, which are computed at the ONIOM[(U)B3LYP-D3/6-311++G(2df,2pd):AMBER]//ONIOM[(U)B3LYP/6-31G(d,p):AMBER] theory level.

| SPE (a.u.) | GFEC (a.u.) | GFE (a.u.) | TAS (kcal/mol) | $\Delta\Delta G$ (kcal/mol) |
|------------|-------------|------------|----------------|-----------------------------|
|------------|-------------|------------|----------------|-----------------------------|

|                                |               |           |               |             |      |
|--------------------------------|---------------|-----------|---------------|-------------|------|
| <sup>3</sup> ES0               | -2190.8980915 | 5.2012090 | -2185.6968825 | 433.6347267 | 0.0  |
| <sup>3</sup> TS1               | -2190.8680115 | 5.1981830 | -2185.6698285 | 430.7131549 | 16.9 |
| <sup>0</sup> S <sup>M</sup> 1  | -2190.8853291 | 5.2028480 | -2185.6824811 | 432.0870301 | 0.0  |
| <sup>0</sup> S <sup>TS</sup> 2 | -2190.8721544 | 5.2095510 | -2185.6626034 | 429.1991492 | 12.5 |
| <sup>1</sup> M2                | -2190.9036590 | 5.2107590 | -2185.6929000 | 429.3544853 | 0.0  |
| <sup>1</sup> TS3               | -2190.8627150 | 5.2033730 | -2185.6593420 | 428.7587816 | 21.0 |

**Table S6.** The single-point energies (SPE), Gibbs free energy correction (GFEC), and relative Gibbs free energies (GFE=SPE+GFEC) of the stationary points involved in the QM modeling, which are computed at the B3LYP/6-31G(d,p)/CPCM<sub>water</sub> level of theory.

|                              | SPE (a.u.)    | GFEC (a.u.) | GFE (a.u.)    |
|------------------------------|---------------|-------------|---------------|
| <b>DDHK<sup>-</sup></b>      | -995.0368612  | 0.2370220   | -994.7998392  |
| <sup>3</sup> O <sub>2</sub>  | -150.3201360  | -0.0161990  | -150.3363350  |
| <b>•DDHK<sup>-</sup></b>     | -994.8520540  | 0.2358870   | -994.6161670  |
| O <sub>2</sub> <sup>•-</sup> | -150.4180477  | -0.0170100  | -150.4350577  |
| <b>DHK<sup>-</sup></b>       | -1069.0549503 | 0.2170740   | -1068.8378763 |
| <b>H<sub>2</sub>O</b>        | -76.4267734   | 0.0029970   | -76.4237764   |
| <b>DOP<sup>-</sup></b>       | -1145.3431769 | 0.2434080   | -1145.0997689 |

**Table S7.** The single-point energies (SPE), zero-point correction energies (ZPE=SPE+ZPC), and relative energies ( $\Delta E$ ) of the stationary points involved in the QM/MM calculations, which are computed at different computational levels (L1~L4).

| Level                          | SPE (a.u.)    | ZPC (a.u.) | ZPE (a.u.)    | $\Delta E$ (kcal/mol) |
|--------------------------------|---------------|------------|---------------|-----------------------|
| Level L1                       |               |            |               |                       |
| <sup>0</sup> S <sup>M</sup> 1  | -2190.8853291 | 5.5584380  | -2185.3268911 | 0.0                   |
| <sup>0</sup> S <sup>TS</sup> 2 | -2190.8721544 | 5.5621820  | -2185.3099724 | 10.6                  |
| Level L2                       |               |            |               |                       |
| <sup>0</sup> S <sup>M</sup> 1  | -2189.8879856 | 5.5584380  | -2184.3295476 | 0.0                   |
| <sup>0</sup> S <sup>TS</sup> 2 | -2189.8729116 | 5.5621820  | -2184.3107296 | 11.8                  |
| Level L3                       |               |            |               |                       |
| <sup>0</sup> S <sup>M</sup> 1  | -2190.0361075 | 5.5584380  | -2184.4776695 | 0.0                   |
| <sup>0</sup> S <sup>TS</sup> 2 | -2190.0238166 | 5.5621820  | -2184.4616346 | 10.1                  |
| Level L4                       |               |            |               |                       |
| <sup>0</sup> S <sup>M</sup> 1  | -2190.8852594 | 5.5595390  | -2185.3257204 | 0.0                   |
| <sup>0</sup> S <sup>TS</sup> 2 | -2190.8720020 | 5.5635190  | -2185.3084830 | 10.8                  |
| Level L3                       |               |            |               |                       |
| <sup>1</sup> M2                | -2190.0585758 | 5.5630270  | -2184.4955488 | 0.0                   |
| <sup>1</sup> TS3               | -2190.0201235 | 5.5551620  | -2184.4649615 | 19.2                  |
| Level L4                       |               |            |               |                       |
| <sup>1</sup> M2                | -2190.9035127 | 5.5643620  | -2185.3391507 | 0.0                   |
| <sup>1</sup> TS3               | -2190.8630263 | 5.5563010  | -2185.3067253 | 20.4                  |

### 3.2 The Cartesian coordinates of QM- and QM/MM-optimized stationary points

**DDHK<sup>-</sup>**



-1 1

|   |             |             |             |
|---|-------------|-------------|-------------|
| C | -2.93317300 | -2.50762400 | 0.04210600  |
| H | -2.54092200 | -3.52006600 | 0.03015900  |
| C | -4.28596300 | -2.27381400 | 0.14777700  |
| H | -4.97922500 | -3.10653300 | 0.22414000  |
| C | -4.79280500 | -0.95824700 | 0.15212000  |
| H | -5.85916600 | -0.77145500 | 0.22585200  |
| C | -3.94125000 | 0.12906700  | 0.05587000  |
| O | -4.50754800 | 1.36614900  | 0.05484800  |
| H | -3.79256400 | 2.02537900  | -0.03212500 |
| C | -2.52144400 | -0.07309300 | -0.03950600 |
| C | -1.56390100 | 0.98078900  | -0.12558000 |
| O | -2.06702600 | 2.27421900  | -0.05390300 |
| H | -1.53055000 | 2.88695100  | -0.57658600 |
| C | -2.02445300 | -1.42010900 | -0.05873500 |
| C | -0.62939800 | -1.63355400 | -0.19502600 |
| H | -0.26471600 | -2.65729300 | -0.22768500 |
| C | 0.26704900  | -0.59125000 | -0.29733900 |
| C | 1.74273700  | -0.85367600 | -0.50430700 |
| H | 2.06288200  | -1.73834300 | 0.05164000  |
| H | 1.92458300  | -1.05478700 | -1.57024900 |
| C | -0.20184100 | 0.75251400  | -0.23211700 |
| C | 0.78828000  | 1.91576700  | -0.25305900 |
| C | 0.88177800  | 2.63619100  | 1.10471400  |
| H | 1.59399800  | 3.46303800  | 1.03086000  |
| H | 1.21511800  | 1.95500800  | 1.89200500  |
| H | -0.09086100 | 3.03847600  | 1.39970100  |
| H | 0.46250200  | 2.65336000  | -1.00227900 |
| O | 2.07666400  | 1.52210300  | -0.71885800 |
| C | 2.60320100  | 0.33471400  | -0.08754200 |
| H | 2.56079500  | 0.44242900  | 1.00337400  |
| C | 4.06194300  | 0.20615800  | -0.49694900 |
| H | 4.55979900  | 1.16763200  | -0.31259500 |
| H | 4.13709400  | 0.02874400  | -1.57728000 |
| C | 4.86528400  | -0.89934900 | 0.25364100  |
| O | 4.32230100  | -1.42469400 | 1.26548800  |
| O | 6.00623100  | -1.14770800 | -0.21699200 |

<sup>3</sup>O<sub>2</sub>

0 3

|   |            |            |             |
|---|------------|------------|-------------|
| O | 0.00000000 | 0.00000000 | 0.60715800  |
| O | 0.00000000 | 0.00000000 | -0.60715800 |

•DDHK-

0 2

|   |             |             |             |
|---|-------------|-------------|-------------|
| C | -2.93106000 | -2.48902200 | 0.02335900  |
| H | -2.54085400 | -3.50081700 | 0.00762100  |
| C | -4.30892300 | -2.26446000 | 0.11760400  |
| H | -4.99097200 | -3.10480300 | 0.17949500  |
| C | -4.80674200 | -0.97276900 | 0.12811500  |
| H | -5.86973000 | -0.77236600 | 0.19667100  |
| C | -3.93260900 | 0.14101500  | 0.04629800  |
| O | -4.51662900 | 1.33273700  | 0.05733100  |
| H | -3.84349500 | 2.04021600  | -0.01151100 |
| C | -2.52082300 | -0.05913000 | -0.03966300 |
| C | -1.57446000 | 0.99658200  | -0.12044500 |
| O | -2.09042700 | 2.24663300  | -0.11064500 |
| H | -1.44397200 | 2.94320900  | -0.29723300 |
| C | -2.02698000 | -1.40321900 | -0.05704600 |
| C | -0.64128600 | -1.62190600 | -0.16552500 |
| H | -0.27140000 | -2.64233100 | -0.18705700 |
| C | 0.27536300  | -0.56245900 | -0.24422600 |
| C | 1.74496900  | -0.85407100 | -0.39306600 |
| H | 2.04714500  | -1.68824900 | 0.24590200  |
| H | 1.92750700  | -1.16496600 | -1.43192400 |
| C | -0.18451500 | 0.76169000  | -0.20127000 |
| C | 0.80327500  | 1.92383600  | -0.24865300 |
| C | 0.91196000  | 2.66018900  | 1.10179800  |
| H | 1.61746400  | 3.48801100  | 0.99779600  |
| H | 1.26272300  | 1.99120700  | 1.89070000  |
| H | -0.05102400 | 3.06771200  | 1.42354200  |
| H | 0.46039700  | 2.64237400  | -1.00761600 |
| O | 2.07498600  | 1.51458600  | -0.72665200 |
| C | 2.61932900  | 0.35162500  | -0.06391600 |
| H | 2.61249000  | 0.50830700  | 1.02132900  |
| C | 4.06113500  | 0.19553500  | -0.51982800 |

|   |            |             |             |
|---|------------|-------------|-------------|
| H | 4.58199900 | 1.14888100  | -0.36676200 |
| H | 4.09374600 | 0.00076600  | -1.59928100 |
| C | 4.86296900 | -0.91856700 | 0.21650600  |
| O | 4.28496100 | -1.52353000 | 1.16335500  |
| O | 6.03440300 | -1.10372100 | -0.20112900 |

**O<sub>2</sub><sup>-</sup>**

-1 2

|   |            |            |             |
|---|------------|------------|-------------|
| O | 0.00000000 | 0.00000000 | 0.67472000  |
| O | 0.00000000 | 0.00000000 | -0.67472000 |

**DHK<sup>-</sup>**

-1 1

|   |             |             |             |
|---|-------------|-------------|-------------|
| C | 3.60121600  | 1.89687400  | 0.18872300  |
| C | 4.87085300  | 1.29814700  | 0.19611100  |
| C | 5.01044000  | -0.07592700 | 0.07832500  |
| C | 3.87085600  | -0.89412400 | -0.05030900 |
| O | 4.04701300  | -2.21827000 | -0.16579800 |
| C | 2.58490700  | -0.30259800 | -0.05367100 |
| C | 1.38995600  | -1.13809100 | -0.18257600 |
| O | 1.48204500  | -2.37789200 | -0.31281300 |
| C | 2.46904700  | 1.10165300  | 0.06466600  |
| C | 1.11943200  | 1.73209800  | 0.05083200  |
| C | -0.07427400 | 0.84860700  | -0.07981100 |
| C | -1.42098100 | 1.51634400  | -0.12487500 |
| C | 0.05512200  | -0.49662600 | -0.17521400 |
| C | -1.15718400 | -1.39533100 | -0.33794200 |
| C | -1.42622700 | -2.26277100 | 0.90470200  |
| O | -2.30665000 | -0.65210200 | -0.72781400 |
| C | -2.56133700 | 0.51730000  | 0.07629500  |
| C | -3.92496000 | 1.04994700  | -0.32816700 |
| C | -5.11106600 | 0.13593900  | 0.10454900  |
| O | -6.07177400 | 0.05384200  | -0.70547500 |
| O | -5.01408600 | -0.40696600 | 1.23944200  |
| H | 3.48625400  | 2.97082000  | 0.27615000  |
| H | 5.75658200  | 1.91796900  | 0.29284700  |
| H | 5.98695500  | -0.54811600 | 0.08045000  |
| H | 3.13872800  | -2.61155600 | -0.25231600 |

|   |             |             |             |
|---|-------------|-------------|-------------|
| H | -1.46026600 | 2.30786600  | 0.63091000  |
| H | -1.52541600 | 2.02238400  | -1.09523900 |
| H | -0.58418500 | -2.93281800 | 1.08890300  |
| H | -2.32492800 | -2.86105300 | 0.73167400  |
| H | -1.58225300 | -1.65026300 | 1.79662500  |
| H | -0.95520100 | -2.06842400 | -1.17927900 |
| H | -2.62044300 | 0.22650100  | 1.13213400  |
| H | -3.95387200 | 1.21492800  | -1.41117200 |
| H | -4.06406200 | 2.02967700  | 0.15046800  |
| O | 0.97936600  | 2.95056600  | 0.14346000  |

**H<sub>2</sub>O**

0 1

|   |             |             |            |
|---|-------------|-------------|------------|
| O | 0.00000000  | 0.12022300  | 0.00000000 |
| H | 0.75671100  | -0.48088700 | 0.00000000 |
| H | -0.75671100 | -0.48090000 | 0.00000000 |

**DOP<sup>-</sup>**

-1 1

|   |             |             |             |
|---|-------------|-------------|-------------|
| C | 2.95316800  | -1.98247900 | -1.13805000 |
| H | 2.81766200  | -3.05484700 | -1.23574900 |
| C | 3.90560100  | -1.30264700 | -1.91240900 |
| H | 4.50885400  | -1.85210900 | -2.62881700 |
| C | 4.09419500  | 0.06906000  | -1.77668300 |
| H | 4.83395000  | 0.59359200  | -2.37295700 |
| C | 3.33085100  | 0.81058200  | -0.85640700 |
| O | 3.57852100  | 2.14550900  | -0.75797000 |
| H | 3.00390100  | 2.51247900  | -0.06332900 |
| C | 2.35695300  | 0.14161600  | -0.11020900 |
| C | 1.43805500  | 0.69846200  | 0.95273900  |
| O | 1.70518300  | 2.03578500  | 1.21226200  |
| H | 1.10532400  | 2.37725900  | 1.89231700  |
| C | 2.18282400  | -1.24387300 | -0.25059500 |
| C | 1.13121100  | -1.76056400 | 0.70495100  |
| H | 1.02653500  | -2.84729200 | 0.70649100  |
| C | -0.16503300 | -1.00342800 | 0.52834600  |
| C | -1.50625300 | -1.63611300 | 0.30409900  |
| H | -1.44085300 | -2.41365000 | -0.46805600 |

|   |             |             |             |
|---|-------------|-------------|-------------|
| H | -1.84243500 | -2.13868300 | 1.22281100  |
| C | -0.00387100 | 0.31878600  | 0.67304500  |
| C | -1.16155600 | 1.28887500  | 0.65699300  |
| C | -1.12725600 | 2.24916700  | -0.54247600 |
| H | -0.20467700 | 2.83651200  | -0.53592000 |
| H | -1.97831800 | 2.93383800  | -0.49006000 |
| H | -1.17565800 | 1.70148400  | -1.48734800 |
| H | -1.13540400 | 1.89455400  | 1.57467800  |
| O | -2.40115100 | 0.58446700  | 0.74315400  |
| C | -2.51760500 | -0.56429300 | -0.12550200 |
| H | -2.30721000 | -0.25906500 | -1.15795900 |
| C | -3.96645900 | -1.01585100 | -0.06829100 |
| H | -4.27050700 | -1.16442900 | 0.97405000  |
| H | -4.03828100 | -1.99450000 | -0.56410000 |
| C | -4.96346100 | -0.05238000 | -0.78171200 |
| O | -6.11012200 | 0.03604800  | -0.26805300 |
| O | -4.54489900 | 0.51589600  | -1.82759900 |
| O | 1.80989100  | -0.00908800 | 2.21590700  |
| O | 1.61369300  | -1.46045200 | 2.06816500  |

### **<sup>3</sup>ES0 (QM, triplet)**

0 3

|                                                   |   |           |          |   |
|---------------------------------------------------|---|-----------|----------|---|
| N-N--0.415700(PDBName=N,ResName=ASN,ResNum=173)   | 0 | -5.719962 | 3.001333 | - |
| 2.300634 L                                        |   |           |          |   |
| H-H-0.271900(PDBName=H,ResName=ASN,ResNum=173)    | 0 | -5.902406 | 2.589924 | - |
| 3.211160 L                                        |   |           |          |   |
| C-CX-0.014300(PDBName=CA,ResName=ASN,ResNum=173)  | 0 | -6.044609 | 2.202427 | - |
| 1.115021 L                                        |   |           |          |   |
| H-H1-0.104800(PDBName=HA,ResName=ASN,ResNum=173)  | 0 | -6.221461 | 2.864880 | - |
| 0.268503 L                                        |   |           |          |   |
| C-2C--0.204100(PDBName=CB,ResName=ASN,ResNum=173) | 0 | -7.339855 | 1.411159 | - |
| 1.381890 H                                        |   |           |          |   |
| H-HC-0.079700(PDBName=HB2,ResName=ASN,ResNum=173) | 0 | -8.149313 | 2.116641 | - |
| 1.551865 H                                        |   |           |          |   |
| H-HC-0.079700(PDBName=HB3,ResName=ASN,ResNum=173) | 0 | -7.211608 | 0.816616 | - |
| 2.290836 H                                        |   |           |          |   |
| C-C-0.713000(PDBName=CG,ResName=ASN,ResNum=173)   | 0 | -7.726860 | 0.511783 | - |
| 0.208405 H                                        |   |           |          |   |

|                                                    |   |            |             |
|----------------------------------------------------|---|------------|-------------|
| O-O--0.593100(PDBName=OD1,ResName=ASN,ResNum=173)  | 0 | -8.527523  | 0.831224    |
| 0.657844 H                                         |   |            |             |
| N-N--0.919100(PDBName=ND2,ResName=ASN,ResNum=173)  | 0 | -7.085946  | -0.696066 - |
| 0.173051 H                                         |   |            |             |
| H-H-0.419600(PDBName=HD21,ResName=ASN,ResNum=173)  | 0 | -7.241068  | -1.312041   |
| 0.611410 H                                         |   |            |             |
| H-H-0.419600(PDBName=HD22,ResName=ASN,ResNum=173)  | 0 | -6.365723  | -0.970445 - |
| 0.826398 H                                         |   |            |             |
| C-C-0.597300(PDBName=C,ResName=ASN,ResNum=173)     | 0 | -4.901277  | 1.234267 -  |
| 0.757402 L                                         |   |            |             |
| O-O--0.567900(PDBName=O,ResName=ASN,ResNum=173)    | 0 | -4.429082  | 0.513094 -  |
| 1.636017 L                                         |   |            |             |
| N-N--0.415700(PDBName=N,ResName=TRP,ResNum=177)    | 0 | -5.949190  | -8.129755   |
| 5.621130 L                                         |   |            |             |
| H-H-0.271900(PDBName=H,ResName=TRP,ResNum=177)     | 0 | -5.060079  | -8.381814   |
| 5.198536 L                                         |   |            |             |
| C-CX--0.027500(PDBName=CA,ResName=TRP,ResNum=177)  | 0 | -6.833033  | -9.249441   |
| 5.953710 L                                         |   |            |             |
| H-H1-0.112300(PDBName=HA,ResName=TRP,ResNum=177)   | 0 | -7.602971  | -8.910399   |
| 6.646205 L                                         |   |            |             |
| C-CT--0.005000(PDBName=CB,ResName=TRP,ResNum=177)  | 0 | -7.512046  | -9.729855   |
| 4.656953 H                                         |   |            |             |
| H-HC-0.033900(PDBName=HB2,ResName=TRP,ResNum=177)  | 0 | -6.708253  | -10.081690  |
| 4.003501 H                                         |   |            |             |
| H-HC-0.033900(PDBName=HB3,ResName=TRP,ResNum=177)  | 0 | -8.097057  | -10.621500  |
| 4.914410 H                                         |   |            |             |
| C-C*--0.141500(PDBName=CG,ResName=TRP,ResNum=177)  | 0 | -8.399910  | -8.769941   |
| 3.921520 H                                         |   |            |             |
| C-CW--0.163800(PDBName=CD1,ResName=TRP,ResNum=177) | 0 | -8.066598  | -7.892131   |
| 2.916445 H                                         |   |            |             |
| H-H4-0.206200(PDBName=HD1,ResName=TRP,ResNum=177)  | 0 | -7.109959  | -7.730277   |
| 2.436844 H                                         |   |            |             |
| N-NA--0.341800(PDBName=NE1,ResName=TRP,ResNum=177) | 0 | -9.170167  | -7.145521   |
| 2.541657 H                                         |   |            |             |
| H-H-0.341200(PDBName=HE1,ResName=TRP,ResNum=177)   | 0 | -9.221358  | -6.514127   |
| 1.750756 H                                         |   |            |             |
| C-CN-0.138000(PDBName=CE2,ResName=TRP,ResNum=177)  | 0 | -10.250389 | -7.538149   |
| 3.304056 H                                         |   |            |             |

|                                                    |   |            |             |
|----------------------------------------------------|---|------------|-------------|
| C-CA--0.260100(PDBName=CZ2,ResName=TRP,ResNum=177) | 0 | -11.574165 | -7.081173   |
| 3.317371 H                                         |   |            |             |
| H-HA-0.157200(PDBName=HZ2,ResName=TRP,ResNum=177)  | 0 | -11.908041 | -6.289567   |
| 2.653873 H                                         |   |            |             |
| C-CA--0.113400(PDBName=CH2,ResName=TRP,ResNum=177) | 0 | -12.445109 | -7.664425   |
| 4.229774 H                                         |   |            |             |
| H-HA-0.141700(PDBName=HH2,ResName=TRP,ResNum=177)  | 0 | -13.459323 | -7.288008   |
| 4.306104 H                                         |   |            |             |
| C-CA--0.197200(PDBName=CZ3,ResName=TRP,ResNum=177) | 0 | -12.032398 | -8.718100   |
| 5.069697 H                                         |   |            |             |
| H-HA-0.144700(PDBName=HZ3,ResName=TRP,ResNum=177)  | 0 | -12.744764 | -9.178006   |
| 5.748945 H                                         |   |            |             |
| C-CA--0.238700(PDBName=CE3,ResName=TRP,ResNum=177) | 0 | -10.721822 | -9.171559   |
| 5.047746 H                                         |   |            |             |
| H-HA-0.170000(PDBName=HE3,ResName=TRP,ResNum=177)  | 0 | -10.413183 | -9.992547   |
| 5.688552 H                                         |   |            |             |
| C-CB-0.124300(PDBName=CD2,ResName=TRP,ResNum=177)  | 0 | -9.799864  | -8.561592   |
| 4.182563 H                                         |   |            |             |
| C-C-0.597300(PDBName=C,ResName=TRP,ResNum=177)     | 0 | -6.067100  | -10.411744  |
| 6.612080 L                                         |   |            |             |
| O-O--0.567900(PDBName=O,ResName=TRP,ResNum=177)    | 0 | -4.863194  | -10.586277  |
| 6.400202 L                                         |   |            |             |
| N-N--0.347900(PDBName=N,ResName=ARG,ResNum=197)    | 0 | -18.574799 | -1.570571 - |
| 5.149329 L                                         |   |            |             |
| H-H-0.274700(PDBName=H,ResName=ARG,ResNum=197)     | 0 | -18.911406 | -2.431020 - |
| 4.724816 L                                         |   |            |             |
| C-CX--0.263700(PDBName=CA,ResName=ARG,ResNum=197)  | 0 | -17.940519 | -1.642098 - |
| 6.480321 L                                         |   |            |             |
| H-H1-0.156000(PDBName=HA,ResName=ARG,ResNum=197)   | 0 | -16.923391 | -1.250494 - |
| 6.423220 L                                         |   |            |             |
| C-C8--0.000700(PDBName=CB,ResName=ARG,ResNum=197)  | 0 | -17.892065 | -3.094419 - |
| 6.991821 L                                         |   |            |             |
| H-HC-0.032700(PDBName=HB2,ResName=ARG,ResNum=197)  | 0 | -18.885475 | -3.543166 - |
| 6.942130 L                                         |   |            |             |
| H-HC-0.032700(PDBName=HB3,ResName=ARG,ResNum=197)  | 0 | -17.609432 | -3.057280 - |
| 8.044191 L                                         |   |            |             |
| C-C8-0.039000(PDBName=CG,ResName=ARG,ResNum=197)   | 0 | -16.892859 | -3.992679 - |
| 6.238574 L                                         |   |            |             |

H-HC-0.028500(PDBName=HG2,ResName=ARG,ResNum=197) 0 -16.013296 -3.415650 -  
 5.952061 L  
 H-HC-0.028500(PDBName=HG3,ResName=ARG,ResNum=197) 0 -17.357233 -4.367998 -  
 5.329702 L  
 C-C8-0.048600(PDBName=CD,ResName=ARG,ResNum=197) 0 -16.448721 -5.188061 -  
 7.090435 H  
 H-H1-0.068700(PDBName=HD2,ResName=ARG,ResNum=197) 0 -15.896495 -5.875221 -  
 6.433337 H  
 H-H1-0.068700(PDBName=HD3,ResName=ARG,ResNum=197) 0 -17.346657 -5.708894 -  
 7.447806 H  
 N-N2--0.529500(PDBName=NE,ResName=ARG,ResNum=197) 0 -15.611160 -4.721267 -  
 8.184643 H  
 H-H-0.345600(PDBName=HE,ResName=ARG,ResNum=197) 0 -15.292651 -3.681715 -  
 8.181073 H  
 C-CA-0.807600(PDBName=CZ,ResName=ARG,ResNum=197) 0 -15.044371 -5.502700 -  
 9.079013 H  
 N-N2--0.862700(PDBName=NH1,ResName=ARG,ResNum=197) 0 -15.346058 -6.842846 -  
 9.232407 H  
 H-H-0.447800(PDBName=HH11,ResName=ARG,ResNum=197) 0 -15.837013 -7.276214 -  
 8.431215 H  
 H-H-0.447800(PDBName=HH12,ResName=ARG,ResNum=197) 0 -14.490640 -7.399091 -  
 9.359768 H  
 N-N2--0.862700(PDBName=NH2,ResName=ARG,ResNum=197) 0 -14.228884 -4.940598 -  
 9.989617 H  
 H-H-0.447800(PDBName=HH21,ResName=ARG,ResNum=197) 0 -13.715923 -4.075014 -  
 9.737352 H  
 H-H-0.447800(PDBName=HH22,ResName=ARG,ResNum=197) 0 -13.719763 -5.603464 -  
 10.582604 H  
 C-C-0.734100(PDBName=C,ResName=ARG,ResNum=197) 0 -18.687346 -0.780087 -  
 7.493668 L  
 O-O--0.589400(PDBName=O,ResName=ARG,ResNum=197) 0 -18.064486 -0.056101 -  
 8.280253 L  
 C-CJ--0.316472(PDBName=C1,ResName=DHK,ResNum=225) 0 -12.494039 -2.101170  
 0.513855 H  
 H-HK-0.158183(PDBName=H2,ResName=DHK,ResNum=225) 0 -13.177780 -1.265380  
 0.626305 H  
 C-CJ--0.090287(PDBName=C3,ResName=DHK,ResNum=225) 0 -11.949264 -2.724531  
 1.612459 H



|                                                    |   |            |             |
|----------------------------------------------------|---|------------|-------------|
| H-HK-0.142318(PDBName=H4,ResName=DHK,ResNum=225)   | 0 | -12.198079 | -2.390107   |
| 2.615039 H                                         |   |            |             |
| C-CJ--0.390043(PDBName=C5,ResName=DHK,ResNum=225)  | 0 | -11.055993 | -3.804042   |
| 1.457610 H                                         |   |            |             |
| H-HK-0.190546(PDBName=H6,ResName=DHK,ResNum=225)   | 0 | -10.610779 | -4.282751   |
| 2.323240 H                                         |   |            |             |
| C-CJ-0.446965(PDBName=C7,ResName=DHK,ResNum=225)   | 0 | -10.732065 | -4.279992   |
| 0.200116 H                                         |   |            |             |
| O-OX--0.642443(PDBName=O8,ResName=DHK,ResNum=225)  | 0 | -9.872399  | -5.338319   |
| 0.125251 H                                         |   |            |             |
| H-HY-0.433577(PDBName=H9,ResName=DHK,ResNum=225)   | 0 | -9.757731  | -5.567186 - |
| 0.820660 H                                         |   |            |             |
| C-CJ--0.168157(PDBName=C10,ResName=DHK,ResNum=225) | 0 | -11.281773 | -3.662698 - |
| 0.973682 H                                         |   |            |             |
| C-CJ-0.254614(PDBName=C11,ResName=DHK,ResNum=225)  | 0 | -10.977249 | -4.060472 - |
| 2.312462 H                                         |   |            |             |
| O-OX--0.544517(PDBName=O12,ResName=DHK,ResNum=225) | 0 | -10.121063 | -5.144546 - |
| 2.471631 H                                         |   |            |             |
| H-HY-0.383602(PDBName=H13,ResName=DHK,ResNum=225)  | 0 | -9.411983  | -4.940895 - |
| 3.118273 H                                         |   |            |             |
| C-CJ-0.213075(PDBName=C14,ResName=DHK,ResNum=225)  | 0 | -12.156342 | -2.537866 - |
| 0.794518 H                                         |   |            |             |
| C-CJ--0.377966(PDBName=C15,ResName=DHK,ResNum=225) | 0 | -12.617040 | -1.845636 - |
| 1.944565 H                                         |   |            |             |
| H-HK-0.179148(PDBName=H16,ResName=DHK,ResNum=225)  | 0 | -13.219449 | -0.951189 - |
| 1.801255 H                                         |   |            |             |
| C-CJ-0.165502(PDBName=C17,ResName=DHK,ResNum=225)  | 0 | -12.285292 | -2.244378 - |
| 3.222842 H                                         |   |            |             |
| C-CZ--0.111477(PDBName=C18,ResName=DHK,ResNum=225) | 0 | -12.654767 | -1.409190 - |
| 4.425389 H                                         |   |            |             |
| H-H8-0.032583(PDBName=H19,ResName=DHK,ResNum=225)  | 0 | -13.604172 | -0.893456 - |
| 4.250157 H                                         |   |            |             |
| H-H8-0.032583(PDBName=H20,ResName=DHK,ResNum=225)  | 0 | -11.888415 | -0.632704 - |
| 4.548034 H                                         |   |            |             |
| C-CJ--0.377452(PDBName=C21,ResName=DHK,ResNum=225) | 0 | -11.506932 | -3.418318 - |
| 3.421463 H                                         |   |            |             |
| C-CZ-0.692240(PDBName=C22,ResName=DHK,ResNum=225)  | 0 | -11.328427 | -3.996116 - |
| 4.824144 H                                         |   |            |             |

C-CZ--0.555194(PDBName=C23,ResName=DHK,ResNum=225) 0 -12.196198 -5.249267 -  
 5.001420 H  
 H-H8-0.129933(PDBName=H24,ResName=DHK,ResNum=225) 0 -11.929837 -6.003341 -  
 4.253715 H  
 H-H8-0.129933(PDBName=H25,ResName=DHK,ResNum=225) 0 -12.049748 -5.691355 -  
 5.991362 H  
 H-H8-0.129933(PDBName=H26,ResName=DHK,ResNum=225) 0 -13.260434 -5.028694 -  
 4.874337 H  
 H-H9--0.039392(PDBName=H27,ResName=DHK,ResNum=225) 0 -10.282672 -4.276097 -  
 4.986617 H  
 O-OI--0.712638(PDBName=O28,ResName=DHK,ResNum=225) 0 -11.581114 -3.051353 -  
 5.870697 H  
 C-CZ-0.665570(PDBName=C29,ResName=DHK,ResNum=225) 0 -12.751990 -2.239907 -  
 5.700785 H  
 H-H9--0.064844(PDBName=H30,ResName=DHK,ResNum=225) 0 -13.647490 -2.876108 -  
 5.639119 H  
 C-CZ--0.289485(PDBName=C31,ResName=DHK,ResNum=225) 0 -12.858468 -1.381324 -  
 6.971919 H  
 H-H8-0.039536(PDBName=H32,ResName=DHK,ResNum=225) 0 -11.854764 -1.038928 -  
 7.234604 H  
 H-H8-0.039536(PDBName=H33,ResName=DHK,ResNum=225) 0 -13.498089 -0.517718 -  
 6.763493 H  
 C-CV-0.810685(PDBName=C34,ResName=DHK,ResNum=225) 0 -13.493324 -2.195776 -  
 8.097599 H  
 O-O5--0.794847(PDBName=O35,ResName=DHK,ResNum=225) 0 -12.758713 -2.733399 -  
 8.963612 H  
 O-O5--0.794847(PDBName=O36,ResName=DHK,ResNum=225) 0 -14.767693 -2.289606 -  
 8.038546 H  
 O-O5--0.000000(PDBName=O1,ResName=OXY,ResNum=226) 0 -7.851870 -3.196025 -  
 1.745639 H  
 O-O5--0.000000(PDBName=O2,ResName=OXY,ResNum=226) 0 -8.719309 -2.343961 -  
 1.698649 H  
 O-OW--0.834000(PDBName=O,ResName=WAT,ResNum=425) 0 -10.252428 0.374415 -  
 2.376807 H  
 H-HW-0.417000(PDBName=H1,ResName=WAT,ResNum=425) 0 -10.533042 -0.521214 -  
 2.142348 H  
 H-HW-0.417000(PDBName=H2,ResName=WAT,ResNum=425) 0 -10.546181 0.882954 -  
 1.597674 H

O-OW--0.834000(PDBName=O,ResName=WAT,ResNum=639) 0 -7.936436 -4.745215 -  
4.300049 H  
H-HW-0.417000(PDBName=H1,ResName=WAT,ResNum=639) 0 -7.212736 -4.101807 -  
4.397622 H  
H-HW-0.417000(PDBName=H2,ResName=WAT,ResNum=639) 0 -7.528931 -5.600709 -  
4.513141 H

**<sup>3</sup>TS1 (QM, triplet)**

0 3

N-N--0.415700(PDBName=N,ResName=ASN,ResNum=173) 0 -5.728884 3.007224 -  
2.306096 L  
H-H-0.271900(PDBName=H,ResName=ASN,ResNum=173) 0 -5.901763 2.594881 -  
3.217862 L  
C-CX-0.014300(PDBName=CA,ResName=ASN,ResNum=173) 0 -6.060779 2.209125 -  
1.122380 L  
H-H1-0.104800(PDBName=HA,ResName=ASN,ResNum=173) 0 -6.220501 2.872076 -  
0.272102 L  
C-2C--0.204100(PDBName=CB,ResName=ASN,ResNum=173) 0 -7.362380 1.428595 -  
1.371959 H  
H-HC-0.079700(PDBName=HB2,ResName=ASN,ResNum=173) 0 -8.164449 2.140698 -  
1.552712 H  
H-HC-0.079700(PDBName=HB3,ResName=ASN,ResNum=173) 0 -7.241952 0.813486 -  
2.267471 H  
C-C-0.713000(PDBName=CG,ResName=ASN,ResNum=173) 0 -7.713872 0.588400 -  
0.143045 H  
O-O--0.593100(PDBName=OD1,ResName=ASN,ResNum=173) 0 -8.168077 1.074429  
0.886272 H  
N-N--0.919100(PDBName=ND2,ResName=ASN,ResNum=173) 0 -7.406850 -0.733890 -  
0.242271 H  
H-H-0.419600(PDBName=HD21,ResName=ASN,ResNum=173) 0 -7.584476 -1.327067  
0.554395 H  
H-H-0.419600(PDBName=HD22,ResName=ASN,ResNum=173) 0 -7.104299 -1.204400 -  
1.084954 H  
C-C-0.597300(PDBName=C,ResName=ASN,ResNum=173) 0 -4.937914 1.217516 -  
0.773194 L  
O-O--0.567900(PDBName=O,ResName=ASN,ResNum=173) 0 -4.447883 0.522721 -  
1.663556 L  
N-N--0.415700(PDBName=N,ResName=TRP,ResNum=177) 0 -5.951209 -8.133992

|                                                    |   |            |            |
|----------------------------------------------------|---|------------|------------|
| 5.617613 L                                         |   |            |            |
| H-H-0.271900(PDBName=H,ResName=TRP,ResNum=177)     | 0 | -5.061085  | -8.384959  |
| 5.196519 L                                         |   |            |            |
| C-CX--0.027500(PDBName=CA,ResName=TRP,ResNum=177)  | 0 | -6.833905  | -9.254259  |
| 5.949429 L                                         |   |            |            |
| H-H1-0.112300(PDBName=HA,ResName=TRP,ResNum=177)   | 0 | -7.605188  | -8.916157  |
| 6.640967 L                                         |   |            |            |
| C-CT--0.005000(PDBName=CB,ResName=TRP,ResNum=177)  | 0 | -7.510674  | -9.737246  |
| 4.652856 H                                         |   |            |            |
| H-HC-0.033900(PDBName=HB2,ResName=TRP,ResNum=177)  | 0 | -6.705246  | -10.076880 |
| 3.995354 H                                         |   |            |            |
| H-HC-0.033900(PDBName=HB3,ResName=TRP,ResNum=177)  | 0 | -8.085560  | -10.636050 |
| 4.907683 H                                         |   |            |            |
| C-C*--0.141500(PDBName=CG,ResName=TRP,ResNum=177)  | 0 | -8.411051  | -8.782799  |
| 3.926238 H                                         |   |            |            |
| C-CW--0.163800(PDBName=CD1,ResName=TRP,ResNum=177) | 0 | -8.090756  | -7.893971  |
| 2.927395 H                                         |   |            |            |
| H-H4-0.206200(PDBName=HD1,ResName=TRP,ResNum=177)  | 0 | -7.137917  | -7.716483  |
| 2.446083 H                                         |   |            |            |
| N-NA--0.341800(PDBName=NE1,ResName=TRP,ResNum=177) | 0 | -9.205210  | -7.156108  |
| 2.564521 H                                         |   |            |            |
| H-H-0.341200(PDBName=HE1,ResName=TRP,ResNum=177)   | 0 | -9.267407  | -6.514746  |
| 1.785184 H                                         |   |            |            |
| C-CN-0.138000(PDBName=CE2,ResName=TRP,ResNum=177)  | 0 | -10.277806 | -7.564854  |
| 3.328851 H                                         |   |            |            |
| C-CA--0.260100(PDBName=CZ2,ResName=TRP,ResNum=177) | 0 | -11.605645 | -7.121015  |
| 3.355272 H                                         |   |            |            |
| H-HA-0.157200(PDBName=HZ2,ResName=TRP,ResNum=177)  | 0 | -11.954705 | -6.332874  |
| 2.695437 H                                         |   |            |            |
| C-CA--0.113400(PDBName=CH2,ResName=TRP,ResNum=177) | 0 | -12.464247 | -7.716994  |
| 4.271429 H                                         |   |            |            |
| H-HA-0.141700(PDBName=HH2,ResName=TRP,ResNum=177)  | 0 | -13.480583 | -7.349695  |
| 4.360421 H                                         |   |            |            |
| C-CA--0.197200(PDBName=CZ3,ResName=TRP,ResNum=177) | 0 | -12.035845 | -8.773392  |
| 5.099424 H                                         |   |            |            |
| H-HA-0.144700(PDBName=HZ3,ResName=TRP,ResNum=177)  | 0 | -12.738350 | -9.244357  |
| 5.781141 H                                         |   |            |            |
| C-CA--0.238700(PDBName=CE3,ResName=TRP,ResNum=177) | 0 | -10.722000 | -9.216196  |

5.061986 H  
H-HA-0.170000(PDBName=HE3,ResName=TRP,ResNum=177) 0 -10.401712 -10.040956  
5.691668 H  
C-CB-0.124300(PDBName=CD2,ResName=TRP,ResNum=177) 0 -9.811852 -8.590756  
4.195912 H  
C-C-0.597300(PDBName=C,ResName=TRP,ResNum=177) 0 -6.066990 -10.413872  
6.609499 L  
O-O--0.567900(PDBName=O,ResName=TRP,ResNum=177) 0 -4.863040 -10.588074  
6.397610 L  
N-N--0.347900(PDBName=N,ResName=ARG,ResNum=197) 0 -18.573160 -1.568531 -  
5.149021 L  
H-H-0.274700(PDBName=H,ResName=ARG,ResNum=197) 0 -18.909277 -2.428891 -  
4.724009 L  
C-CX--0.263700(PDBName=CA,ResName=ARG,ResNum=197) 0 -17.938873 -1.641202 -  
6.479746 L  
H-H1-0.156000(PDBName=HA,ResName=ARG,ResNum=197) 0 -16.921228 -1.250740 -  
6.422524 L  
C-C8--0.000700(PDBName=CB,ResName=ARG,ResNum=197) 0 -17.891581 -3.094047 -  
6.990035 L  
H-HC-0.032700(PDBName=HB2,ResName=ARG,ResNum=197) 0 -18.885939 -3.540918 -  
6.942909 L  
H-HC-0.032700(PDBName=HB3,ResName=ARG,ResNum=197) 0 -17.606165 -3.058156 -  
8.041655 L  
C-C8-0.039000(PDBName=CG,ResName=ARG,ResNum=197) 0 -16.896469 -3.994192 -  
6.233541 L  
H-HC-0.028500(PDBName=HG2,ResName=ARG,ResNum=197) 0 -16.019951 -3.417449 -  
5.937671 L  
H-HC-0.028500(PDBName=HG3,ResName=ARG,ResNum=197) 0 -17.366779 -4.374600 -  
5.329955 L  
C-C8-0.048600(PDBName=CD,ResName=ARG,ResNum=197) 0 -16.444370 -5.185071 -  
7.087283 H  
H-H1-0.068700(PDBName=HD2,ResName=ARG,ResNum=197) 0 -15.896882 -5.875266 -  
6.429258 H  
H-H1-0.068700(PDBName=HD3,ResName=ARG,ResNum=197) 0 -17.339266 -5.704629 -  
7.453945 H  
N-N2--0.529500(PDBName=NE,ResName=ARG,ResNum=197) 0 -15.598962 -4.712327 -  
8.172443 H  
H-H-0.345600(PDBName=HE,ResName=ARG,ResNum=197) 0 -15.279692 -3.674764 -

8.158883 H  
C-CA-0.807600(PDBName=CZ,ResName=ARG,ResNum=197) 0 -15.036583 -5.489048 -  
9.074632 H  
N-N2--0.862700(PDBName=NH1,ResName=ARG,ResNum=197) 0 -15.345779 -6.826383 -  
9.238291 H  
H-H-0.447800(PDBName=HH11,ResName=ARG,ResNum=197) 0 -15.838232 -7.263863 -  
8.440269 H  
H-H-0.447800(PDBName=HH12,ResName=ARG,ResNum=197) 0 -14.493218 -7.385975 -  
9.370354 H  
N-N2--0.862700(PDBName=NH2,ResName=ARG,ResNum=197) 0 -14.218337 -4.923986 -  
9.979735 H  
H-H-0.447800(PDBName=HH21,ResName=ARG,ResNum=197) 0 -13.703705 -4.060839 -  
9.722095 H  
H-H-0.447800(PDBName=HH22,ResName=ARG,ResNum=197) 0 -13.715398 -5.583373 -  
10.581721 H  
C-C-0.734100(PDBName=C,ResName=ARG,ResNum=197) 0 -18.685303 -0.779500 -  
7.493601 L  
O-O--0.589400(PDBName=O,ResName=ARG,ResNum=197) 0 -18.062412 -0.055384 -  
8.280028 L  
C-CJ--0.316472(PDBName=C1,ResName=DHK,ResNum=225) 0 -12.496018 -1.918826  
0.539057 H  
H-HK-0.158183(PDBName=H2,ResName=DHK,ResNum=225) 0 -13.094320 -1.019260  
0.638773 H  
C-CJ--0.090287(PDBName=C3,ResName=DHK,ResNum=225) 0 -12.021169 -2.584689  
1.664596 H  
H-HK-0.142318(PDBName=H4,ResName=DHK,ResNum=225) 0 -12.248672 -2.209285  
2.657140 H  
C-CJ--0.390043(PDBName=C5,ResName=DHK,ResNum=225) 0 -11.239817 -3.733456  
1.537011 H  
H-HK-0.190546(PDBName=H6,ResName=DHK,ResNum=225) 0 -10.850463 -4.247282  
2.409040 H  
C-CJ-0.446965(PDBName=C7,ResName=DHK,ResNum=225) 0 -10.948979 -4.254583  
0.267356 H  
O-OX--0.642443(PDBName=O8,ResName=DHK,ResNum=225) 0 -10.207053 -5.376228  
0.194457 H  
H-HY-0.433577(PDBName=H9,ResName=DHK,ResNum=225) 0 -10.116653 -5.594464 -  
0.771893 H  
C-CJ--0.168157(PDBName=C10,ResName=DHK,ResNum=225) 0 -11.434356 -3.605142 -

0.900389 H  
C-CJ-0.254614(PDBName=C11,ResName=DHK,ResNum=225) 0 -11.128633 -4.079522 -  
2.223911 H  
O-OX--0.544517(PDBName=O12,ResName=DHK,ResNum=225) 0 -10.413614 -5.180568 -  
2.360036 H  
H-HY-0.383602(PDBName=H13,ResName=DHK,ResNum=225) 0 -9.428903 -5.016771 -  
3.106955 H  
C-CJ-0.213075(PDBName=C14,ResName=DHK,ResNum=225) 0 -12.188216 -2.400686 -  
0.751284 H  
C-CJ--0.377966(PDBName=C15,ResName=DHK,ResNum=225) 0 -12.565251 -1.687991 -  
1.919888 H  
H-HK-0.179148(PDBName=H16,ResName=DHK,ResNum=225) 0 -13.073087 -0.734422 -  
1.803019 H  
C-CJ-0.165502(PDBName=C17,ResName=DHK,ResNum=225) 0 -12.273425 -2.151848 -  
3.201668 H  
C-CZ--0.111477(PDBName=C18,ResName=DHK,ResNum=225) 0 -12.582495 -1.314460 -  
4.416231 H  
H-H8-0.032583(PDBName=H19,ResName=DHK,ResNum=225) 0 -13.470316 -0.700511 -  
4.237376 H  
H-H8-0.032583(PDBName=H20,ResName=DHK,ResNum=225) 0 -11.740685 -0.625173 -  
4.559169 H  
C-CJ--0.377452(PDBName=C21,ResName=DHK,ResNum=225) 0 -11.634276 -3.386756 -  
3.370970 H  
C-CZ-0.692240(PDBName=C22,ResName=DHK,ResNum=225) 0 -11.519863 -4.022008 -  
4.747802 H  
C-CZ--0.555194(PDBName=C23,ResName=DHK,ResNum=225) 0 -12.482080 -5.215228 -  
4.872661 H  
H-H8-0.129933(PDBName=H24,ResName=DHK,ResNum=225) 0 -12.250378 -5.978889 -  
4.122839 H  
H-H8-0.129933(PDBName=H25,ResName=DHK,ResNum=225) 0 -12.383066 -5.677198 -  
5.859652 H  
H-H8-0.129933(PDBName=H26,ResName=DHK,ResNum=225) 0 -13.525186 -4.915573 -  
4.733798 H  
H-H9--0.039392(PDBName=H27,ResName=DHK,ResNum=225) 0 -10.499930 -4.385883 -  
4.896152 H  
O-OI--0.712638(PDBName=O28,ResName=DHK,ResNum=225) 0 -11.711305 -3.101560 -  
5.823790 H  
C-CZ-0.665570(PDBName=C29,ResName=DHK,ResNum=225) 0 -12.790682 -2.169455 -

5.662316 H  
H-H9--0.064844(PDBName=H30,ResName=DHK,ResNum=225) 0 -13.744434 -2.709547 -  
5.566222 H  
C-CZ--0.289485(PDBName=C31,ResName=DHK,ResNum=225) 0 -12.836820 -1.351740 -  
6.960784 H  
H-H8-0.039536(PDBName=H32,ResName=DHK,ResNum=225) 0 -11.816153 -1.058973 -  
7.218723 H  
H-H8-0.039536(PDBName=H33,ResName=DHK,ResNum=225) 0 -13.444049 -0.456374 -  
6.791582 H  
C-CV-0.810685(PDBName=C34,ResName=DHK,ResNum=225) 0 -13.483708 -2.179826 -  
8.071798 H  
O-O5--0.794847(PDBName=O35,ResName=DHK,ResNum=225) 0 -12.755218 -2.721500 -  
8.939891 H  
O-O5--0.794847(PDBName=O36,ResName=DHK,ResNum=225) 0 -14.756979 -2.275093 -  
8.000040 H  
O-O5--0.000000(PDBName=O1,ResName=OXY,ResNum=226) 0 -7.811936 -2.784702 -  
2.348226 H  
O-O5--0.000000(PDBName=O2,ResName=OXY,ResNum=226) 0 -9.039622 -2.361999 -  
2.196195 H  
O-OW--0.834000(PDBName=O,ResName=WAT,ResNum=425) 0 -10.269114 0.344320 -  
2.366267 H  
H-HW-0.417000(PDBName=H1,ResName=WAT,ResNum=425) 0 -9.759726 -0.435091 -  
2.086281 H  
H-HW-0.417000(PDBName=H2,ResName=WAT,ResNum=425) 0 -10.618417 0.698894 -  
1.528148 H  
O-OW--0.834000(PDBName=O,ResName=WAT,ResNum=639) 0 -8.492190 -4.672644 -  
3.709237 H  
H-HW-0.417000(PDBName=H1,ResName=WAT,ResNum=639) 0 -8.026510 -3.854095 -  
3.114651 H  
H-HW-0.417000(PDBName=H2,ResName=WAT,ResNum=639) 0 -7.868958 -5.390227 -  
3.902719 H

**<sup>3</sup>M1 (QM, triplet)**

0 3  
N-N--0.415700(PDBName=N,ResName=ASN,ResNum=173) 0 -5.726325 3.005919 -  
2.304850 L  
H-H-0.271900(PDBName=H,ResName=ASN,ResNum=173) 0 -5.901888 2.594961 -  
3.216772 L



|                                                   |   |           |            |   |
|---------------------------------------------------|---|-----------|------------|---|
| C-CX-0.014300(PDBName=CA,ResName=ASN,ResNum=173)  | 0 | -6.056473 | 2.206844   | - |
| 1.121113 L                                        |   |           |            |   |
| H-H1-0.104800(PDBName=HA,ResName=ASN,ResNum=173)  | 0 | -6.223154 | 2.868752   | - |
| 0.271481 L                                        |   |           |            |   |
| C-2C--0.204100(PDBName=CB,ResName=ASN,ResNum=173) | 0 | -7.353077 | 1.419614   | - |
| 1.378279 H                                        |   |           |            |   |
| H-HC-0.079700(PDBName=HB2,ResName=ASN,ResNum=173) | 0 | -8.158750 | 2.125347   | - |
| 1.564824 H                                        |   |           |            |   |
| H-HC-0.079700(PDBName=HB3,ResName=ASN,ResNum=173) | 0 | -7.221149 | 0.805068   | - |
| 2.272912 H                                        |   |           |            |   |
| C-C-0.713000(PDBName=CG,ResName=ASN,ResNum=173)   | 0 | -7.717952 | 0.571537   | - |
| 0.159331 H                                        |   |           |            |   |
| O-O--0.593100(PDBName=OD1,ResName=ASN,ResNum=173) | 0 | -8.290947 | 1.025483   |   |
| 0.823599 H                                        |   |           |            |   |
| N-N--0.919100(PDBName=ND2,ResName=ASN,ResNum=173) | 0 | -7.286829 | -0.720114  | - |
| 0.207500 H                                        |   |           |            |   |
| H-H-0.419600(PDBName=HD21,ResName=ASN,ResNum=173) | 0 | -7.481177 | -1.323381  |   |
| 0.577452 H                                        |   |           |            |   |
| H-H-0.419600(PDBName=HD22,ResName=ASN,ResNum=173) | 0 | -6.884832 | -1.166296  | - |
| 1.019420 H                                        |   |           |            |   |
| C-C-0.597300(PDBName=C,ResName=ASN,ResNum=173)    | 0 | -4.927464 | 1.221886   | - |
| 0.770830 L                                        |   |           |            |   |
| O-O--0.567900(PDBName=O,ResName=ASN,ResNum=173)   | 0 | -4.449060 | 0.515483   | - |
| 1.658543 L                                        |   |           |            |   |
| N-N--0.415700(PDBName=N,ResName=TRP,ResNum=177)   | 0 | -5.951860 | -8.133713  |   |
| 5.614807 L                                        |   |           |            |   |
| H-H-0.271900(PDBName=H,ResName=TRP,ResNum=177)    | 0 | -5.061587 | -8.385807  |   |
| 5.194705 L                                        |   |           |            |   |
| C-CX--0.027500(PDBName=CA,ResName=TRP,ResNum=177) | 0 | -6.835849 | -9.253718  |   |
| 5.945447 L                                        |   |           |            |   |
| H-H1-0.112300(PDBName=HA,ResName=TRP,ResNum=177)  | 0 | -7.606872 | -8.915706  |   |
| 6.637281 L                                        |   |           |            |   |
| C-CT--0.005000(PDBName=CB,ResName=TRP,ResNum=177) | 0 | -7.513359 | -9.732611  |   |
| 4.647122 H                                        |   |           |            |   |
| H-HC-0.033900(PDBName=HB2,ResName=TRP,ResNum=177) | 0 | -6.707554 | -10.062673 |   |
| 3.985275 H                                        |   |           |            |   |
| H-HC-0.033900(PDBName=HB3,ResName=TRP,ResNum=177) | 0 | -8.081315 | -10.636892 |   |
| 4.897937 H                                        |   |           |            |   |

|                                                    |   |            |             |
|----------------------------------------------------|---|------------|-------------|
| C-C*--0.141500(PDBName=CG,ResName=TRP,ResNum=177)  | 0 | -8.423646  | -8.780162   |
| 3.928881 H                                         |   |            |             |
| C-CW--0.163800(PDBName=CD1,ResName=TRP,ResNum=177) | 0 | -8.116341  | -7.882039   |
| 2.933982 H                                         |   |            |             |
| H-H4-0.206200(PDBName=HD1,ResName=TRP,ResNum=177)  | 0 | -7.167849  | -7.692874   |
| 2.448603 H                                         |   |            |             |
| N-NA--0.341800(PDBName=NE1,ResName=TRP,ResNum=177) | 0 | -9.239541  | -7.150831   |
| 2.582707 H                                         |   |            |             |
| H-H-0.341200(PDBName=HE1,ResName=TRP,ResNum=177)   | 0 | -9.311992  | -6.500093   |
| 1.812594 H                                         |   |            |             |
| C-CN-0.138000(PDBName=CE2,ResName=TRP,ResNum=177)  | 0 | -10.304159 | -7.573464   |
| 3.350027 H                                         |   |            |             |
| C-CA--0.260100(PDBName=CZ2,ResName=TRP,ResNum=177) | 0 | -11.634741 | -7.139350   |
| 3.387868 H                                         |   |            |             |
| H-HA-0.157200(PDBName=HZ2,ResName=TRP,ResNum=177)  | 0 | -11.993558 | -6.352658   |
| 2.731806 H                                         |   |            |             |
| C-CA--0.113400(PDBName=CH2,ResName=TRP,ResNum=177) | 0 | -12.482462 | -7.747254   |
| 4.306317 H                                         |   |            |             |
| H-HA-0.141700(PDBName=HH2,ResName=TRP,ResNum=177)  | 0 | -13.500616 | -7.387868   |
| 4.405483 H                                         |   |            |             |
| C-CA--0.197200(PDBName=CZ3,ResName=TRP,ResNum=177) | 0 | -12.041125 | -8.806580   |
| 5.123717 H                                         |   |            |             |
| H-HA-0.144700(PDBName=HZ3,ResName=TRP,ResNum=177)  | 0 | -12.735571 | -9.287399   |
| 5.806809 H                                         |   |            |             |
| C-CA--0.238700(PDBName=CE3,ResName=TRP,ResNum=177) | 0 | -10.724673 | -9.240178   |
| 5.073851 H                                         |   |            |             |
| H-HA-0.170000(PDBName=HE3,ResName=TRP,ResNum=177)  | 0 | -10.394488 | -10.067823  |
| 5.694453 H                                         |   |            |             |
| C-CB-0.124300(PDBName=CD2,ResName=TRP,ResNum=177)  | 0 | -9.824761  | -8.601535   |
| 4.206882 H                                         |   |            |             |
| C-C-0.597300(PDBName=C,ResName=TRP,ResNum=177)     | 0 | -6.068890  | -10.414528  |
| 6.605774 L                                         |   |            |             |
| O-O--0.567900(PDBName=O,ResName=TRP,ResNum=177)    | 0 | -4.865327  | -10.589291  |
| 6.392098 L                                         |   |            |             |
| N-N--0.347900(PDBName=N,ResName=ARG,ResNum=197)    | 0 | -18.572107 | -1.568971 - |
| 5.150127 L                                         |   |            |             |
| H-H-0.274700(PDBName=H,ResName=ARG,ResNum=197)     | 0 | -18.907602 | -2.429291 - |
| 4.724526 L                                         |   |            |             |

C-CX--0.263700(PDBName=CA,ResName=ARG,ResNum=197) 0 -17.938877 -1.642244 -  
 6.481395 L  
 H-H1-0.156000(PDBName=HA,ResName=ARG,ResNum=197) 0 -16.920641 -1.253241 -  
 6.424840 L  
 C-C8--0.000700(PDBName=CB,ResName=ARG,ResNum=197) 0 -17.894089 -3.095036 -  
 6.992493 L  
 H-HC-0.032700(PDBName=HB2,ResName=ARG,ResNum=197) 0 -18.889099 -3.540379 -  
 6.945016 L  
 H-HC-0.032700(PDBName=HB3,ResName=ARG,ResNum=197) 0 -17.609371 -3.058917 -  
 8.044300 L  
 C-C8-0.039000(PDBName=CG,ResName=ARG,ResNum=197) 0 -16.899979 -3.997618 -  
 6.237592 L  
 H-HC-0.028500(PDBName=HG2,ResName=ARG,ResNum=197) 0 -16.022526 -3.422430 -  
 5.941956 L  
 H-HC-0.028500(PDBName=HG3,ResName=ARG,ResNum=197) 0 -17.370222 -4.377865 -  
 5.333897 L  
 C-C8-0.048600(PDBName=CD,ResName=ARG,ResNum=197) 0 -16.449911 -5.188719 -  
 7.092283 H  
 H-H1-0.068700(PDBName=HD2,ResName=ARG,ResNum=197) 0 -15.902125 -5.879276 -  
 6.434972 H  
 H-H1-0.068700(PDBName=HD3,ResName=ARG,ResNum=197) 0 -17.345661 -5.707444 -  
 7.458123 H  
 N-N2--0.529500(PDBName=NE,ResName=ARG,ResNum=197) 0 -15.605272 -4.716506 -  
 8.178283 H  
 H-H-0.345600(PDBName=HE,ResName=ARG,ResNum=197) 0 -15.286731 -3.679615 -  
 8.165725 H  
 C-CA-0.807600(PDBName=CZ,ResName=ARG,ResNum=197) 0 -15.039974 -5.493626 -  
 9.078424 H  
 N-N2--0.862700(PDBName=NH1,ResName=ARG,ResNum=197) 0 -15.346841 -6.831593 -  
 9.240549 H  
 H-H-0.447800(PDBName=HH11,ResName=ARG,ResNum=197) 0 -15.840356 -7.268702 -  
 8.442976 H  
 H-H-0.447800(PDBName=HH12,ResName=ARG,ResNum=197) 0 -14.493354 -7.390278 -  
 9.370337 H  
 N-N2--0.862700(PDBName=NH2,ResName=ARG,ResNum=197) 0 -14.221317 -4.928581 -  
 9.983121 H  
 H-H-0.447800(PDBName=HH21,ResName=ARG,ResNum=197) 0 -13.708072 -4.063787 -  
 9.726517 H

H-H-0.447800(PDBName=HH22,ResName=ARG,ResNum=197) 0 -13.716653 -5.588553 -  
10.583080 H  
C-C-0.734100(PDBName=C,ResName=ARG,ResNum=197) 0 -18.685205 -0.779584 -  
7.494439 L  
O-O--0.589400(PDBName=O,ResName=ARG,ResNum=197) 0 -18.062490 -0.055464 -  
8.281033 L  
C-CJ--0.316472(PDBName=C1,ResName=DHK,ResNum=225) 0 -12.601273 -1.801071  
0.538990 H  
H-HK-0.158183(PDBName=H2,ResName=DHK,ResNum=225) 0 -13.159305 -0.874420  
0.622061 H  
C-CJ--0.090287(PDBName=C3,ResName=DHK,ResNum=225) 0 -12.171979 -2.477961  
1.679051 H  
H-HK-0.142318(PDBName=H4,ResName=DHK,ResNum=225) 0 -12.393852 -2.079729  
2.663931 H  
C-CJ--0.390043(PDBName=C5,ResName=DHK,ResNum=225) 0 -11.445009 -3.662204  
1.576098 H  
H-HK-0.190546(PDBName=H6,ResName=DHK,ResNum=225) 0 -11.092579 -4.184322  
2.458977 H  
C-CJ-0.446965(PDBName=C7,ResName=DHK,ResNum=225) 0 -11.160010 -4.209630  
0.311505 H  
O-OX--0.642443(PDBName=O8,ResName=DHK,ResNum=225) 0 -10.465504 -5.359210  
0.247009 H  
H-HY-0.433577(PDBName=H9,ResName=DHK,ResNum=225) 0 -10.377652 -5.571250 -  
0.729017 H  
C-CJ--0.168157(PDBName=C10,ResName=DHK,ResNum=225) 0 -11.604250 -3.551493 -  
0.861181 H  
C-CJ-0.254614(PDBName=C11,ResName=DHK,ResNum=225) 0 -11.316536 -4.090971 -  
2.178421 H  
O-OX--0.544517(PDBName=O12,ResName=DHK,ResNum=225) 0 -10.645617 -5.176431 -  
2.291612 H  
H-HY-0.383602(PDBName=H13,ResName=DHK,ResNum=225) 0 -9.229853 -5.079045 -  
3.317754 H  
C-CJ-0.213075(PDBName=C14,ResName=DHK,ResNum=225) 0 -12.301995 -2.314261 -  
0.740294 H  
C-CJ--0.377966(PDBName=C15,ResName=DHK,ResNum=225) 0 -12.634391 -1.608698 -  
1.928000 H  
H-HK-0.179148(PDBName=H16,ResName=DHK,ResNum=225) 0 -13.094196 -0.628300 -  
1.837485 H

C-CJ-0.165502(PDBName=C17,ResName=DHK,ResNum=225) 0 -12.352659 -2.114738 -  
 3.205440 H  
 C-CZ--0.111477(PDBName=C18,ResName=DHK,ResNum=225) 0 -12.612637 -1.279656 -  
 4.433114 H  
 H-H8-0.032583(PDBName=H19,ResName=DHK,ResNum=225) 0 -13.482442 -0.634779 -  
 4.276251 H  
 H-H8-0.032583(PDBName=H20,ResName=DHK,ResNum=225) 0 -11.746484 -0.620475 -  
 4.573008 H  
 C-CJ--0.377452(PDBName=C21,ResName=DHK,ResNum=225) 0 -11.786116 -3.378115 -  
 3.350619 H  
 C-CZ-0.692240(PDBName=C22,ResName=DHK,ResNum=225) 0 -11.628467 -4.023589 -  
 4.714714 H  
 C-CZ--0.555194(PDBName=C23,ResName=DHK,ResNum=225) 0 -12.585448 -5.216266 -  
 4.874879 H  
 H-H8-0.129933(PDBName=H24,ResName=DHK,ResNum=225) 0 -12.379843 -5.979614 -  
 4.117260 H  
 H-H8-0.129933(PDBName=H25,ResName=DHK,ResNum=225) 0 -12.449368 -5.677737 -  
 5.857739 H  
 H-H8-0.129933(PDBName=H26,ResName=DHK,ResNum=225) 0 -13.633372 -4.916388 -  
 4.776024 H  
 H-H9--0.039392(PDBName=H27,ResName=DHK,ResNum=225) 0 -10.602758 -4.389125 -  
 4.814419 H  
 O-OI--0.712638(PDBName=O28,ResName=DHK,ResNum=225) 0 -11.775730 -3.108468 -  
 5.804419 H  
 C-CZ-0.665570(PDBName=C29,ResName=DHK,ResNum=225) 0 -12.830216 -2.146125 -  
 5.669252 H  
 H-H9--0.064844(PDBName=H30,ResName=DHK,ResNum=225) 0 -13.799764 -2.657568 -  
 5.574730 H  
 C-CZ--0.289485(PDBName=C31,ResName=DHK,ResNum=225) 0 -12.842056 -1.347972 -  
 6.979844 H  
 H-H8-0.039536(PDBName=H32,ResName=DHK,ResNum=225) 0 -11.812815 -1.079240 -  
 7.229723 H  
 H-H8-0.039536(PDBName=H33,ResName=DHK,ResNum=225) 0 -13.433966 -0.438281 -  
 6.833123 H  
 C-CV-0.810685(PDBName=C34,ResName=DHK,ResNum=225) 0 -13.490060 -2.180994 -  
 8.086157 H  
 O-O5--0.794847(PDBName=O35,ResName=DHK,ResNum=225) 0 -12.762837 -2.723487 -  
 8.954842 H

O-O5--0.794847(PDBName=O36,ResName=DHK,ResNum=225) 0 -14.762870 -2.277841 -  
8.011148 H  
O-O5--0.000000(PDBName=O1,ResName=OXY,ResNum=226) 0 -7.717439 -2.798266 -  
2.273576 H  
O-O5--0.000000(PDBName=O2,ResName=OXY,ResNum=226) 0 -8.969522 -2.363902 -  
2.171909 H  
O-OW--0.834000(PDBName=O,ResName=WAT,ResNum=425) 0 -10.245875 0.314997 -  
2.287080 H  
H-HW-0.417000(PDBName=H1,ResName=WAT,ResNum=425) 0 -9.736233 -0.451108 -  
1.974963 H  
H-HW-0.417000(PDBName=H2,ResName=WAT,ResNum=425) 0 -10.586470 0.709579 -  
1.463515 H  
O-OW--0.834000(PDBName=O,ResName=WAT,ResNum=639) 0 -8.441190 -4.750118 -  
3.813388 H  
H-HW-0.417000(PDBName=H1,ResName=WAT,ResNum=639) 0 -7.810792 -3.617331 -  
2.870250 H  
H-HW-0.417000(PDBName=H2,ResName=WAT,ResNum=639) 0 -7.924322 -5.528168 -  
4.073482 H

**osM1 (QM, open-shell singlet)**

0 1  
N-N--0.415700(PDBName=N,ResName=ASN,ResNum=173) 0 -5.726613 3.006197 -  
2.303931 L  
H-H-0.271900(PDBName=H,ResName=ASN,ResNum=173) 0 -5.902910 2.593995 -  
3.215147 L  
C-CX-0.014300(PDBName=CA,ResName=ASN,ResNum=173) 0 -6.055437 2.209939 -  
1.118060 L  
H-H1-0.104800(PDBName=HA,ResName=ASN,ResNum=173) 0 -6.216038 2.873881 -  
0.268851 L  
C-2C--0.204100(PDBName=CB,ResName=ASN,ResNum=173) 0 -7.356093 1.427200 -  
1.366704 H  
H-HC-0.079700(PDBName=HB2,ResName=ASN,ResNum=173) 0 -8.160135 2.135996 -  
1.549324 H  
H-HC-0.079700(PDBName=HB3,ResName=ASN,ResNum=173) 0 -7.232170 0.810446 -  
2.260926 H  
C-C-0.713000(PDBName=CG,ResName=ASN,ResNum=173) 0 -7.714317 0.584709 -  
0.141686 H  
O-O--0.593100(PDBName=OD1,ResName=ASN,ResNum=173) 0 -8.258587 1.049600

0.852367 H  
N-N--0.919100(PDBName=ND2,ResName=ASN,ResNum=173) 0 -7.316757 -0.716435 -  
0.202206 H  
H-H-0.419600(PDBName=HD21,ResName=ASN,ResNum=173) 0 -7.495193 -1.314550  
0.590449 H  
H-H-0.419600(PDBName=HD22,ResName=ASN,ResNum=173) 0 -6.913699 -1.165228 -  
1.012207 H  
C-C-0.597300(PDBName=C,ResName=ASN,ResNum=173) 0 -4.929477 1.221118 -  
0.769703 L  
O-O--0.567900(PDBName=O,ResName=ASN,ResNum=173) 0 -4.454506 0.513364 -  
1.658074 L  
N-N--0.415700(PDBName=N,ResName=TRP,ResNum=177) 0 -5.951558 -8.133886  
5.615096 L  
H-H-0.271900(PDBName=H,ResName=TRP,ResNum=177) 0 -5.061220 -8.385942  
5.195102 L  
C-CX--0.027500(PDBName=CA,ResName=TRP,ResNum=177) 0 -6.835624 -9.253858  
5.945337 L  
H-H1-0.112300(PDBName=HA,ResName=TRP,ResNum=177) 0 -7.606814 -8.916016  
6.637073 L  
C-CT--0.005000(PDBName=CB,ResName=TRP,ResNum=177) 0 -7.512797 -9.732341  
4.646696 H  
H-HC-0.033900(PDBName=HB2,ResName=TRP,ResNum=177) 0 -6.706730 -10.060371  
3.984177 H  
H-HC-0.033900(PDBName=HB3,ResName=TRP,ResNum=177) 0 -8.079204 -10.637836  
4.896678 H  
C-C\*--0.141500(PDBName=CG,ResName=TRP,ResNum=177) 0 -8.425318 -8.780769  
3.930101 H  
C-CW--0.163800(PDBName=CD1,ResName=TRP,ResNum=177) 0 -8.120889 -7.881954  
2.934700 H  
H-H4-0.206200(PDBName=HD1,ResName=TRP,ResNum=177) 0 -7.173576 -7.692162  
2.447337 H  
N-NA--0.341800(PDBName=NE1,ResName=TRP,ResNum=177) 0 -9.246548 -7.155023  
2.583240 H  
H-H-0.341200(PDBName=HE1,ResName=TRP,ResNum=177) 0 -9.322042 -6.497925  
1.818901 H  
C-CN-0.138000(PDBName=CE2,ResName=TRP,ResNum=177) 0 -10.308728 -7.578059  
3.353584 H  
C-CA--0.260100(PDBName=CZ2,ResName=TRP,ResNum=177) 0 -11.639567 -7.144850

|                                                    |   |            |             |
|----------------------------------------------------|---|------------|-------------|
| 3.393791 H                                         |   |            |             |
| H-HA-0.157200(PDBName=HZ2,ResName=TRP,ResNum=177)  | 0 | -11.998846 | -6.356576   |
| 2.739853 H                                         |   |            |             |
| C-CA--0.113400(PDBName=CH2,ResName=TRP,ResNum=177) | 0 | -12.485317 | -7.754341   |
| 4.312948 H                                         |   |            |             |
| H-HA-0.141700(PDBName=HH2,ResName=TRP,ResNum=177)  | 0 | -13.503590 | -7.396083   |
| 4.414910 H                                         |   |            |             |
| C-CA--0.197200(PDBName=CZ3,ResName=TRP,ResNum=177) | 0 | -12.041674 | -8.814614   |
| 5.127993 H                                         |   |            |             |
| H-HA-0.144700(PDBName=HZ3,ResName=TRP,ResNum=177)  | 0 | -12.734655 | -9.297394   |
| 5.811187 H                                         |   |            |             |
| C-CA--0.238700(PDBName=CE3,ResName=TRP,ResNum=177) | 0 | -10.724818 | -9.246568   |
| 5.076202 H                                         |   |            |             |
| H-HA-0.170000(PDBName=HE3,ResName=TRP,ResNum=177)  | 0 | -10.393312 | -10.074922  |
| 5.695093 H                                         |   |            |             |
| C-CB-0.124300(PDBName=CD2,ResName=TRP,ResNum=177)  | 0 | -9.826398  | -8.605463   |
| 4.209465 H                                         |   |            |             |
| C-C-0.597300(PDBName=C,ResName=TRP,ResNum=177)     | 0 | -6.068779  | -10.414696  |
| 6.605641 L                                         |   |            |             |
| O-O--0.567900(PDBName=O,ResName=TRP,ResNum=177)    | 0 | -4.865241  | -10.589577  |
| 6.391933 L                                         |   |            |             |
| N-N--0.347900(PDBName=N,ResName=ARG,ResNum=197)    | 0 | -18.571983 | -1.569177 - |
| 5.150303 L                                         |   |            |             |
| H-H-0.274700(PDBName=H,ResName=ARG,ResNum=197)     | 0 | -18.907656 | -2.429479 - |
| 4.724805 L                                         |   |            |             |
| C-CX--0.263700(PDBName=CA,ResName=ARG,ResNum=197)  | 0 | -17.938862 | -1.642432 - |
| 6.481638 L                                         |   |            |             |
| H-H1-0.156000(PDBName=HA,ResName=ARG,ResNum=197)   | 0 | -16.920544 | -1.253635 - |
| 6.425136 L                                         |   |            |             |
| C-C8--0.000700(PDBName=CB,ResName=ARG,ResNum=197)  | 0 | -17.894424 | -3.095144 - |
| 6.993058 L                                         |   |            |             |
| H-HC-0.032700(PDBName=HB2,ResName=ARG,ResNum=197)  | 0 | -18.889545 | -3.540246 - |
| 6.945677 L                                         |   |            |             |
| H-HC-0.032700(PDBName=HB3,ResName=ARG,ResNum=197)  | 0 | -17.609739 | -3.058854 - |
| 8.044869 L                                         |   |            |             |
| C-C8-0.039000(PDBName=CG,ResName=ARG,ResNum=197)   | 0 | -16.900545 | -3.998257 - |
| 6.238527 L                                         |   |            |             |
| H-HC-0.028500(PDBName=HG2,ResName=ARG,ResNum=197)  | 0 | -16.023142 | -3.423345 - |



5.942318 L  
H-HC-0.028500(PDBName=HG3,ResName=ARG,ResNum=197) 0 -17.371046 -4.379033 -  
5.335176 L  
C-C8-0.048600(PDBName=CD,ResName=ARG,ResNum=197) 0 -16.450441 -5.188869 -  
7.093882 H  
H-H1-0.068700(PDBName=HD2,ResName=ARG,ResNum=197) 0 -15.903022 -5.879876 -  
6.436730 H  
H-H1-0.068700(PDBName=HD3,ResName=ARG,ResNum=197) 0 -17.346184 -5.707185 -  
7.460288 H  
N-N2--0.529500(PDBName=NE,ResName=ARG,ResNum=197) 0 -15.605267 -4.716472 -  
8.179461 H  
H-H-0.345600(PDBName=HE,ResName=ARG,ResNum=197) 0 -15.285596 -3.679219 -  
8.166728 H  
C-CA-0.807600(PDBName=CZ,ResName=ARG,ResNum=197) 0 -15.040243 -5.494090 -  
9.079340 H  
N-N2--0.862700(PDBName=NH1,ResName=ARG,ResNum=197) 0 -15.348025 -6.832037 -  
9.241566 H  
H-H-0.447800(PDBName=HH11,ResName=ARG,ResNum=197) 0 -15.841396 -7.268773 -  
8.443653 H  
H-H-0.447800(PDBName=HH12,ResName=ARG,ResNum=197) 0 -14.494636 -7.391061 -  
9.370968 H  
N-N2--0.862700(PDBName=NH2,ResName=ARG,ResNum=197) 0 -14.220736 -4.930244 -  
9.983860 H  
H-H-0.447800(PDBName=HH21,ResName=ARG,ResNum=197) 0 -13.707443 -4.065148 -  
9.728652 H  
H-H-0.447800(PDBName=HH22,ResName=ARG,ResNum=197) 0 -13.716453 -5.590608 -  
10.583655 H  
C-C-0.734100(PDBName=C,ResName=ARG,ResNum=197) 0 -18.685152 -0.779534 -  
7.494496 L  
O-O--0.589400(PDBName=O,ResName=ARG,ResNum=197) 0 -18.062424 -0.055322 -  
8.280987 L  
C-CJ--0.316472(PDBName=C1,ResName=DHK,ResNum=225) 0 -12.605432 -1.795294  
0.543820 H  
H-HK-0.158183(PDBName=H2,ResName=DHK,ResNum=225) 0 -13.166658 -0.870420  
0.626388 H  
C-CJ--0.090287(PDBName=C3,ResName=DHK,ResNum=225) 0 -12.173478 -2.469635  
1.684094 H  
H-HK-0.142318(PDBName=H4,ResName=DHK,ResNum=225) 0 -12.394822 -2.070538

2.668758 H  
C-CJ--0.390043(PDBName=C5,ResName=DHK,ResNum=225) 0 -11.444267 -3.652686  
1.581552 H  
H-HK-0.190546(PDBName=H6,ResName=DHK,ResNum=225) 0 -11.090791 -4.174307  
2.464317 H  
C-CJ-0.446965(PDBName=C7,ResName=DHK,ResNum=225) 0 -11.160183 -4.201524  
0.317387 H  
O-OX--0.642443(PDBName=O8,ResName=DHK,ResNum=225) 0 -10.461643 -5.348873  
0.254438 H  
H-HY-0.433577(PDBName=H9,ResName=DHK,ResNum=225) 0 -10.376711 -5.564454 -  
0.720692 H  
C-CJ--0.168157(PDBName=C10,ResName=DHK,ResNum=225) 0 -11.608103 -3.546906 -  
0.855565 H  
C-CJ-0.254614(PDBName=C11,ResName=DHK,ResNum=225) 0 -11.324082 -4.089472 -  
2.172852 H  
O-OX--0.544517(PDBName=O12,ResName=DHK,ResNum=225) 0 -10.652307 -5.173842 -  
2.285382 H  
H-HY-0.383602(PDBName=H13,ResName=DHK,ResNum=225) 0 -9.233993 -5.082991 -  
3.318460 H  
C-CJ-0.213075(PDBName=C14,ResName=DHK,ResNum=225) 0 -12.307516 -2.310382 -  
0.735553 H  
C-CJ--0.377966(PDBName=C15,ResName=DHK,ResNum=225) 0 -12.643077 -1.607671 -  
1.923242 H  
H-HK-0.179148(PDBName=H16,ResName=DHK,ResNum=225) 0 -13.106709 -0.628923 -  
1.833772 H  
C-CJ-0.165502(PDBName=C17,ResName=DHK,ResNum=225) 0 -12.363440 -2.115695 -  
3.201184 H  
C-CZ--0.111477(PDBName=C18,ResName=DHK,ResNum=225) 0 -12.624972 -1.280941 -  
4.428575 H  
H-H8-0.032583(PDBName=H19,ResName=DHK,ResNum=225) 0 -13.498123 -0.640267 -  
4.273080 H  
H-H8-0.032583(PDBName=H20,ResName=DHK,ResNum=225) 0 -11.761119 -0.617920 -  
4.564637 H  
C-CJ--0.377452(PDBName=C21,ResName=DHK,ResNum=225) 0 -11.795800 -3.378034 -  
3.345545 H  
C-CZ-0.692240(PDBName=C22,ResName=DHK,ResNum=225) 0 -11.635162 -4.022930 -  
4.709702 H  
C-CZ--0.555194(PDBName=C23,ResName=DHK,ResNum=225) 0 -12.590335 -5.216397 -

4.873454 H  
H-H8-0.129933(PDBName=H24,ResName=DHK,ResNum=225) 0 -12.385151 -5.980245 -  
4.116152 H  
H-H8-0.129933(PDBName=H25,ResName=DHK,ResNum=225) 0 -12.450968 -5.676882 -  
5.856341 H  
H-H8-0.129933(PDBName=H26,ResName=DHK,ResNum=225) 0 -13.639063 -4.918547 -  
4.776853 H  
H-H9--0.039392(PDBName=H27,ResName=DHK,ResNum=225) 0 -10.609034 -4.387795 -  
4.806838 H  
O-OI--0.712638(PDBName=O28,ResName=DHK,ResNum=225) 0 -11.779528 -3.106614 -  
5.798640 H  
C-CZ-0.665570(PDBName=C29,ResName=DHK,ResNum=225) 0 -12.836336 -2.146465 -  
5.666164 H  
H-H9--0.064844(PDBName=H30,ResName=DHK,ResNum=225) 0 -13.805036 -2.660030 -  
5.575516 H  
C-CZ--0.289485(PDBName=C31,ResName=DHK,ResNum=225) 0 -12.845531 -1.347122 -  
6.976294 H  
H-H8-0.039536(PDBName=H32,ResName=DHK,ResNum=225) 0 -11.815911 -1.077287 -  
7.223462 H  
H-H8-0.039536(PDBName=H33,ResName=DHK,ResNum=225) 0 -13.438602 -0.438073 -  
6.830550 H  
C-CV-0.810685(PDBName=C34,ResName=DHK,ResNum=225) 0 -13.490361 -2.180459 -  
8.084187 H  
O-O5--0.794847(PDBName=O35,ResName=DHK,ResNum=225) 0 -12.761515 -2.721664 -  
8.952114 H  
O-O5--0.794847(PDBName=O36,ResName=DHK,ResNum=225) 0 -14.763334 -2.278872 -  
8.010726 H  
O-O5--0.000000(PDBName=O1,ResName=OXY,ResNum=226) 0 -7.724405 -2.806432 -  
2.258836 H  
O-O5--0.000000(PDBName=O2,ResName=OXY,ResNum=226) 0 -8.975233 -2.363227 -  
2.178399 H  
O-OW--0.834000(PDBName=O,ResName=WAT,ResNum=425) 0 -10.261424 0.326367 -  
2.307459 H  
H-HW-0.417000(PDBName=H1,ResName=WAT,ResNum=425) 0 -9.735981 -0.431644 -  
2.002856 H  
H-HW-0.417000(PDBName=H2,ResName=WAT,ResNum=425) 0 -10.611807 0.704141 -  
1.479639 H  
O-OW--0.834000(PDBName=O,ResName=WAT,ResNum=639) 0 -8.447515 -4.752677 -

3.815614 H  
H-HW-0.417000(PDBName=H1,ResName=WAT,ResNum=639) 0 -7.811655 -3.619075 -  
2.862920 H  
H-HW-0.417000(PDBName=H2,ResName=WAT,ResNum=639) 0 -7.930473 -5.530653 -  
4.076001 H

**o<sup>s</sup>TS2 (QM, open-shell singlet)**

0 1  
N-N--0.415700(PDBName=N,ResName=ASN,ResNum=173) 0 -5.755714 3.028518 -  
2.304654 L  
H-H-0.271900(PDBName=H,ResName=ASN,ResNum=173) 0 -5.928169 2.606244 -  
3.212034 L  
C-CX-0.014300(PDBName=CA,ResName=ASN,ResNum=173) 0 -6.119047 2.267715 -  
1.108762 L  
H-H1-0.104800(PDBName=HA,ResName=ASN,ResNum=173) 0 -6.189121 2.943401 -  
0.256641 L  
C-2C--0.204100(PDBName=CB,ResName=ASN,ResNum=173) 0 -7.495750 1.618337 -  
1.309302 H  
H-HC-0.079700(PDBName=HB2,ResName=ASN,ResNum=173) 0 -8.229739 2.402807 -  
1.488965 H  
H-HC-0.079700(PDBName=HB3,ResName=ASN,ResNum=173) 0 -7.456816 0.966437 -  
2.186809 H  
C-C-0.713000(PDBName=CG,ResName=ASN,ResNum=173) 0 -7.913422 0.863268 -  
0.049729 H  
O-O--0.593100(PDBName=OD1,ResName=ASN,ResNum=173) 0 -8.354884 1.432138  
0.942437 H  
N-N--0.919100(PDBName=ND2,ResName=ASN,ResNum=173) 0 -7.708764 -0.483649 -  
0.075947 H  
H-H-0.419600(PDBName=HD21,ResName=ASN,ResNum=173) 0 -7.998744 -1.016782  
0.730280 H  
H-H-0.419600(PDBName=HD22,ResName=ASN,ResNum=173) 0 -7.488771 -1.010406 -  
0.908945 H  
C-C-0.597300(PDBName=C,ResName=ASN,ResNum=173) 0 -5.066648 1.193274 -  
0.794972 L  
O-O--0.567900(PDBName=O,ResName=ASN,ResNum=173) 0 -4.661013 0.466036 -  
1.701395 L  
N-N--0.415700(PDBName=N,ResName=TRP,ResNum=177) 0 -5.959463 -8.140234  
5.607978 L

|                                                                  |   |            |            |
|------------------------------------------------------------------|---|------------|------------|
| H-H-0.271900(PDBName=H,ResName=TRP,ResNum=177)<br>5.183634 L     | 0 | -5.070423  | -8.389431  |
| C-CX--0.027500(PDBName=CA,ResName=TRP,ResNum=177)<br>5.947580 L  | 0 | -6.837074  | -9.261393  |
| H-H1-0.112300(PDBName=HA,ResName=TRP,ResNum=177)<br>6.635504 L   | 0 | -7.610740  | -8.921600  |
| C-CT--0.005000(PDBName=CB,ResName=TRP,ResNum=177)<br>4.656993 H  | 0 | -7.509729  | -9.763539  |
| H-HC-0.033900(PDBName=HB2,ResName=TRP,ResNum=177)<br>4.004832 H  | 0 | -6.702010  | -10.107638 |
| H-HC-0.033900(PDBName=HB3,ResName=TRP,ResNum=177)<br>4.922758 H  | 0 | -8.080410  | -10.661972 |
| C-C*--0.141500(PDBName=CG,ResName=TRP,ResNum=177)<br>3.916594 H  | 0 | -8.414669  | -8.826253  |
| C-CW--0.163800(PDBName=CD1,ResName=TRP,ResNum=177)<br>2.892747 H | 0 | -8.102319  | -7.964862  |
| H-H4-0.206200(PDBName=HD1,ResName=TRP,ResNum=177)<br>2.398522 H  | 0 | -7.153593  | -7.801424  |
| N-NA--0.341800(PDBName=NE1,ResName=TRP,ResNum=177)<br>2.521696 H | 0 | -9.217741  | -7.231859  |
| H-H-0.341200(PDBName=HE1,ResName=TRP,ResNum=177)<br>1.675427 H   | 0 | -9.309221  | -6.684583  |
| C-CN-0.138000(PDBName=CE2,ResName=TRP,ResNum=177)<br>3.300486 H  | 0 | -10.286675 | -7.627484  |
| C-CA--0.260100(PDBName=CZ2,ResName=TRP,ResNum=177)<br>3.324577 H | 0 | -11.614728 | -7.184266  |
| H-HA-0.157200(PDBName=HZ2,ResName=TRP,ResNum=177)<br>2.646574 H  | 0 | -11.969209 | -6.414075  |
| C-CA--0.113400(PDBName=CH2,ResName=TRP,ResNum=177)<br>4.262142 H | 0 | -12.466299 | -7.756815  |
| H-HA-0.141700(PDBName=HH2,ResName=TRP,ResNum=177)<br>4.350860 H  | 0 | -13.481418 | -7.386706  |
| C-CA--0.197200(PDBName=CZ3,ResName=TRP,ResNum=177)<br>5.112060 H | 0 | -12.032034 | -8.792875  |
| H-HA-0.144700(PDBName=HZ3,ResName=TRP,ResNum=177)<br>5.808583 H  | 0 | -12.730010 | -9.248640  |
| C-CA--0.238700(PDBName=CE3,ResName=TRP,ResNum=177)<br>5.076595 H | 0 | -10.718037 | -9.235256  |

|                                                   |   |            |             |
|---------------------------------------------------|---|------------|-------------|
| H-HA-0.170000(PDBName=HE3,ResName=TRP,ResNum=177) | 0 | -10.393772 | -10.047357  |
| 5.719885 H                                        |   |            |             |
| C-CB-0.124300(PDBName=CD2,ResName=TRP,ResNum=177) | 0 | -9.814280  | -8.629293   |
| 4.190735 H                                        |   |            |             |
| C-C-0.597300(PDBName=C,ResName=TRP,ResNum=177)    | 0 | -6.065892  | -10.411493  |
| 6.615463 L                                        |   |            |             |
| O-O--0.567900(PDBName=O,ResName=TRP,ResNum=177)   | 0 | -4.860689  | -10.582538  |
| 6.407865 L                                        |   |            |             |
| N-N--0.347900(PDBName=N,ResName=ARG,ResNum=197)   | 0 | -18.570494 | -1.580939 - |
| 5.157025 L                                        |   |            |             |
| H-H-0.274700(PDBName=H,ResName=ARG,ResNum=197)    | 0 | -18.900854 | -2.441812 - |
| 4.728498 L                                        |   |            |             |
| C-CX--0.263700(PDBName=CA,ResName=ARG,ResNum=197) | 0 | -17.936497 | -1.652929 - |
| 6.488646 L                                        |   |            |             |
| H-H1-0.156000(PDBName=HA,ResName=ARG,ResNum=197)  | 0 | -16.918980 | -1.262599 - |
| 6.430310 L                                        |   |            |             |
| C-C8--0.000700(PDBName=CB,ResName=ARG,ResNum=197) | 0 | -17.889368 | -3.104432 - |
| 7.002948 L                                        |   |            |             |
| H-HC-0.032700(PDBName=HB2,ResName=ARG,ResNum=197) | 0 | -18.882996 | -3.552639 - |
| 6.952113 L                                        |   |            |             |
| H-HC-0.032700(PDBName=HB3,ResName=ARG,ResNum=197) | 0 | -17.608368 | -3.065567 - |
| 8.055692 L                                        |   |            |             |
| C-C8-0.039000(PDBName=CG,ResName=ARG,ResNum=197)  | 0 | -16.889111 | -4.005397 - |
| 6.254919 L                                        |   |            |             |
| H-HC-0.028500(PDBName=HG2,ResName=ARG,ResNum=197) | 0 | -16.002409 | -3.433015 - |
| 5.981411 L                                        |   |            |             |
| H-HC-0.028500(PDBName=HG3,ResName=ARG,ResNum=197) | 0 | -17.346960 | -4.371546 - |
| 5.338792 L                                        |   |            |             |
| C-C8-0.048600(PDBName=CD,ResName=ARG,ResNum=197)  | 0 | -16.462650 | -5.208987 - |
| 7.104687 H                                        |   |            |             |
| H-H1-0.068700(PDBName=HD2,ResName=ARG,ResNum=197) | 0 | -15.911045 | -5.897401 - |
| 6.448569 H                                        |   |            |             |
| H-H1-0.068700(PDBName=HD3,ResName=ARG,ResNum=197) | 0 | -17.368063 | -5.722902 - |
| 7.452547 H                                        |   |            |             |
| N-N2--0.529500(PDBName=NE,ResName=ARG,ResNum=197) | 0 | -15.629931 | -4.755959 - |
| 8.208643 H                                        |   |            |             |
| H-H-0.345600(PDBName=HE,ResName=ARG,ResNum=197)   | 0 | -15.293994 | -3.736122 - |
| 8.200943 H                                        |   |            |             |

C-CA-0.807600(PDBName=CZ,ResName=ARG,ResNum=197) 0 -15.070566 -5.548749 -  
 9.102657 H  
 N-N2--0.862700(PDBName=NH1,ResName=ARG,ResNum=197) 0 -15.385834 -6.886881 -  
 9.242233 H  
 H-H-0.447800(PDBName=HH11,ResName=ARG,ResNum=197) 0 -15.878890 -7.309291 -  
 8.436408 H  
 H-H-0.447800(PDBName=HH12,ResName=ARG,ResNum=197) 0 -14.535964 -7.452510 -  
 9.365224 H  
 N-N2--0.862700(PDBName=NH2,ResName=ARG,ResNum=197) 0 -14.254909 -5.002642 -  
 10.017491 H  
 H-H-0.447800(PDBName=HH21,ResName=ARG,ResNum=197) 0 -13.735221 -4.128087 -  
 9.784350 H  
 H-H-0.447800(PDBName=HH22,ResName=ARG,ResNum=197) 0 -13.753519 -5.676059 -  
 10.605517 H  
 C-C-0.734100(PDBName=C,ResName=ARG,ResNum=197) 0 -18.682467 -0.789276 -  
 7.501502 L  
 O-O--0.589400(PDBName=O,ResName=ARG,ResNum=197) 0 -18.057610 -0.069154 -  
 8.290025 L  
 C-CJ--0.316472(PDBName=C1,ResName=DHK,ResNum=225) 0 -11.546889 -1.825889  
 0.338377 H  
 H-HK-0.158183(PDBName=H2,ResName=DHK,ResNum=225) 0 -11.797826 -0.771753  
 0.404457 H  
 C-CJ--0.090287(PDBName=C3,ResName=DHK,ResNum=225) 0 -11.267983 -2.569635  
 1.483767 H  
 H-HK-0.142318(PDBName=H4,ResName=DHK,ResNum=225) 0 -11.348834 -2.105286  
 2.460374 H  
 C-CJ--0.390043(PDBName=C5,ResName=DHK,ResNum=225) 0 -10.870068 -3.902212  
 1.392485 H  
 H-HK-0.190546(PDBName=H6,ResName=DHK,ResNum=225) 0 -10.613491 -4.470718  
 2.279686 H  
 C-CJ-0.446965(PDBName=C7,ResName=DHK,ResNum=225) 0 -10.773585 -4.526697  
 0.137554 H  
 O-OX--0.642443(PDBName=O8,ResName=DHK,ResNum=225) 0 -10.338064 -5.800472  
 0.082257 H  
 H-HY-0.433577(PDBName=H9,ResName=DHK,ResNum=225) 0 -10.315926 -6.052211 -  
 0.883012 H  
 C-CJ--0.168157(PDBName=C10,ResName=DHK,ResNum=225) 0 -11.128105 -3.815011 -  
 1.029980 H

C-CJ-0.254614(PDBName=C11,ResName=DHK,ResNum=225) 0 -11.064510 -4.437020 -  
 2.350889 H  
 O-OX--0.544517(PDBName=O12,ResName=DHK,ResNum=225) 0 -10.565605 -5.596685 -  
 2.479770 H  
 H-HY-0.383602(PDBName=H13,ResName=DHK,ResNum=225) 0 -8.997718 -5.229362 -  
 3.460184 H  
 C-CJ-0.213075(PDBName=C14,ResName=DHK,ResNum=225) 0 -11.482990 -2.446945 -  
 0.919888 H  
 C-CJ--0.377966(PDBName=C15,ResName=DHK,ResNum=225) 0 -11.684934 -1.717350 -  
 2.127795 H  
 H-HK-0.179148(PDBName=H16,ResName=DHK,ResNum=225) 0 -11.874485 -0.651299 -  
 2.054645 H  
 C-CJ-0.165502(PDBName=C17,ResName=DHK,ResNum=225) 0 -11.849234 -2.369128 -  
 3.383670 H  
 C-CZ--0.111477(PDBName=C18,ResName=DHK,ResNum=225) 0 -12.272909 -1.541687 -  
 4.564411 H  
 H-H8-0.032583(PDBName=H19,ResName=DHK,ResNum=225) 0 -13.125904 -0.911900 -  
 4.282800 H  
 H-H8-0.032583(PDBName=H20,ResName=DHK,ResNum=225) 0 -11.460442 -0.847504 -  
 4.812562 H  
 C-CJ--0.377452(PDBName=C21,ResName=DHK,ResNum=225) 0 -11.559275 -3.705867 -  
 3.513011 H  
 C-CZ-0.692240(PDBName=C22,ResName=DHK,ResNum=225) 0 -11.649428 -4.404854 -  
 4.856957 H  
 C-CZ--0.555194(PDBName=C23,ResName=DHK,ResNum=225) 0 -12.792575 -5.425150 -  
 4.907364 H  
 H-H8-0.129933(PDBName=H24,ResName=DHK,ResNum=225) 0 -12.638562 -6.204186 -  
 4.153099 H  
 H-H8-0.129933(PDBName=H25,ResName=DHK,ResNum=225) 0 -12.814493 -5.915950 -  
 5.886469 H  
 H-H8-0.129933(PDBName=H26,ResName=DHK,ResNum=225) 0 -13.768706 -4.966122 -  
 4.725901 H  
 H-H9--0.039392(PDBName=H27,ResName=DHK,ResNum=225) 0 -10.705894 -4.932369 -  
 5.023881 H  
 O-OI--0.712638(PDBName=O28,ResName=DHK,ResNum=225) 0 -11.726478 -3.480187 -  
 5.953986 H  
 C-CZ-0.665570(PDBName=C29,ResName=DHK,ResNum=225) 0 -12.652782 -2.396247 -  
 5.771017 H



H-H9--0.064844(PDBName=H30,ResName=DHK,ResNum=225) 0 -13.667619 -2.792667 -  
5.623205 H

C-CZ--0.289485(PDBName=C31,ResName=DHK,ResNum=225) 0 -12.644350 -1.583674 -  
7.072147 H

H-H8-0.039536(PDBName=H32,ResName=DHK,ResNum=225) 0 -11.604825 -1.413097 -  
7.363935 H

H-H8-0.039536(PDBName=H33,ResName=DHK,ResNum=225) 0 -13.131608 -0.621255 -  
6.879948 H

C-CV-0.810685(PDBName=C34,ResName=DHK,ResNum=225) 0 -13.414940 -2.312402 -  
8.171246 H

O-O5--0.794847(PDBName=O35,ResName=DHK,ResNum=225) 0 -12.762556 -2.858029 -  
9.098762 H

O-O5--0.794847(PDBName=O36,ResName=DHK,ResNum=225) 0 -14.683567 -2.327870 -  
8.039585 H

O-O5--0.000000(PDBName=O1,ResName=OXY,ResNum=226) 0 -8.703354 -2.413679 -  
2.172842 H

O-O5--0.000000(PDBName=O2,ResName=OXY,ResNum=226) 0 -9.472283 -1.390539 -  
2.631651 H

O-OW--0.834000(PDBName=O,ResName=WAT,ResNum=425) 0 -10.525110 0.971137 -  
1.650658 H

H-HW-0.417000(PDBName=H1,ResName=WAT,ResNum=425) 0 -9.937379 0.196502 -  
1.633271 H

H-HW-0.417000(PDBName=H2,ResName=WAT,ResNum=425) 0 -10.487217 1.325875 -  
0.747428 H

O-OW--0.834000(PDBName=O,ResName=WAT,ResNum=639) 0 -8.431925 -4.542381 -  
3.860892 H

H-HW-0.417000(PDBName=H1,ResName=WAT,ResNum=639) 0 -8.594034 -3.062182 -  
2.924186 H

H-HW-0.417000(PDBName=H2,ResName=WAT,ResNum=639) 0 -7.596506 -4.964937 -  
4.104335 H

**<sup>1</sup>M2 (QM, closed-shell singlet)**

0 1

N-N--0.415700(PDBName=N,ResName=ASN,ResNum=173) 0 -5.786907 3.041908 -  
2.277794 L

H-H-0.271900(PDBName=H,ResName=ASN,ResNum=173) 0 -5.967610 2.594810 -  
3.171902 L

C-CX-0.014300(PDBName=CA,ResName=ASN,ResNum=173) 0 -6.150368 2.323803 -

1.045249 L  
H-H1-0.104800(PDBName=HA,ResName=ASN,ResNum=173) 0 -6.085826 3.011785 -  
0.204540 L  
C-2C--0.204100(PDBName=CB,ResName=ASN,ResNum=173) 0 -7.609126 1.837970 -  
1.114105 H  
H-HC-0.079700(PDBName=HB2,ResName=ASN,ResNum=173) 0 -8.242332 2.679434 -  
1.416066 H  
H-HC-0.079700(PDBName=HB3,ResName=ASN,ResNum=173) 0 -7.713797 1.077209 -  
1.894823 H  
C-C-0.713000(PDBName=CG,ResName=ASN,ResNum=173) 0 -8.121315 1.286709  
0.218015 H  
O-O--0.593100(PDBName=OD1,ResName=ASN,ResNum=173) 0 -7.512159 1.297942  
1.269315 H  
N-N--0.919100(PDBName=ND2,ResName=ASN,ResNum=173) 0 -9.363806 0.658836  
0.139387 H  
H-H-0.419600(PDBName=HD21,ResName=ASN,ResNum=173) 0 -9.762433 0.465504  
1.051517 H  
H-H-0.419600(PDBName=HD22,ResName=ASN,ResNum=173) 0 -10.051610 1.013496 -  
0.517557 H  
C-C-0.597300(PDBName=C,ResName=ASN,ResNum=173) 0 -5.155211 1.181934 -  
0.775333 L  
O-O--0.567900(PDBName=O,ResName=ASN,ResNum=173) 0 -4.808979 0.459217 -  
1.708146 L  
N-N--0.415700(PDBName=N,ResName=TRP,ResNum=177) 0 -5.947859 -8.128705  
5.630683 L  
H-H-0.271900(PDBName=H,ResName=TRP,ResNum=177) 0 -5.061603 -8.377466  
5.199889 L  
C-CX--0.027500(PDBName=CA,ResName=TRP,ResNum=177) 0 -6.829749 -9.249033  
5.963149 L  
H-H1-0.112300(PDBName=HA,ResName=TRP,ResNum=177) 0 -7.597502 -8.910807  
6.658200 L  
C-CT--0.005000(PDBName=CB,ResName=TRP,ResNum=177) 0 -7.513304 -9.727639  
4.668610 H  
H-HC-0.033900(PDBName=HB2,ResName=TRP,ResNum=177) 0 -6.714494 -10.103771  
4.023060 H  
H-HC-0.033900(PDBName=HB3,ResName=TRP,ResNum=177) 0 -8.119336 -10.603350  
4.931895 H  
C-C\*-0.141500(PDBName=CG,ResName=TRP,ResNum=177) 0 -8.372850 -8.755255

|                                                    |   |            |             |
|----------------------------------------------------|---|------------|-------------|
| 3.915565 H                                         |   |            |             |
| C-CW--0.163800(PDBName=CD1,ResName=TRP,ResNum=177) | 0 | -8.005437  | -7.898431   |
| 2.904660 H                                         |   |            |             |
| H-H4-0.206200(PDBName=HD1,ResName=TRP,ResNum=177)  | 0 | -7.038809  | -7.762479   |
| 2.437443 H                                         |   |            |             |
| N-NA--0.341800(PDBName=NE1,ResName=TRP,ResNum=177) | 0 | -9.087574  | -7.135070   |
| 2.502147 H                                         |   |            |             |
| H-H-0.341200(PDBName=HE1,ResName=TRP,ResNum=177)   | 0 | -9.113009  | -6.514492   |
| 1.702963 H                                         |   |            |             |
| C-CN-0.138000(PDBName=CE2,ResName=TRP,ResNum=177)  | 0 | -10.188001 | -7.495584   |
| 3.250492 H                                         |   |            |             |
| C-CA--0.260100(PDBName=CZ2,ResName=TRP,ResNum=177) | 0 | -11.504629 | -7.019669   |
| 3.228586 H                                         |   |            |             |
| H-HA-0.157200(PDBName=HZ2,ResName=TRP,ResNum=177)  | 0 | -11.816261 | -6.240988   |
| 2.539088 H                                         |   |            |             |
| C-CA--0.113400(PDBName=CH2,ResName=TRP,ResNum=177) | 0 | -12.404484 | -7.573826   |
| 4.131340 H                                         |   |            |             |
| H-HA-0.141700(PDBName=HH2,ResName=TRP,ResNum=177)  | 0 | -13.415998 | -7.184492   |
| 4.174207 H                                         |   |            |             |
| C-CA--0.197200(PDBName=CZ3,ResName=TRP,ResNum=177) | 0 | -12.024088 | -8.615733   |
| 5.000341 H                                         |   |            |             |
| H-HA-0.144700(PDBName=HZ3,ResName=TRP,ResNum=177)  | 0 | -12.757462 | -9.052155   |
| 5.672620 H                                         |   |            |             |
| C-CA--0.238700(PDBName=CE3,ResName=TRP,ResNum=177) | 0 | -10.720062 | -9.089645   |
| 5.013170 H                                         |   |            |             |
| H-HA-0.170000(PDBName=HE3,ResName=TRP,ResNum=177)  | 0 | -10.437021 | -9.901824   |
| 5.676892 H                                         |   |            |             |
| C-CB-0.124300(PDBName=CD2,ResName=TRP,ResNum=177)  | 0 | -9.771849  | -8.513199   |
| 4.153311 H                                         |   |            |             |
| C-C-0.597300(PDBName=C,ResName=TRP,ResNum=177)     | 0 | -6.062323  | -10.411599  |
| 6.617424 L                                         |   |            |             |
| O-O--0.567900(PDBName=O,ResName=TRP,ResNum=177)    | 0 | -4.857789  | -10.584369  |
| 6.407983 L                                         |   |            |             |
| N-N--0.347900(PDBName=N,ResName=ARG,ResNum=197)    | 0 | -18.559383 | -1.591138 - |
| 5.140368 L                                         |   |            |             |
| H-H-0.274700(PDBName=H,ResName=ARG,ResNum=197)     | 0 | -18.890316 | -2.457490 - |
| 4.723458 L                                         |   |            |             |
| C-CX--0.263700(PDBName=CA,ResName=ARG,ResNum=197)  | 0 | -17.922943 | -1.650150 - |

6.471444 L  
H-H1-0.156000(PDBName=HA,ResName=ARG,ResNum=197) 0 -16.906759 -1.257114 -  
6.409374 L  
C-C8--0.000700(PDBName=CB,ResName=ARG,ResNum=197) 0 -17.868917 -3.099319 -  
6.992194 L  
H-HC-0.032700(PDBName=HB2,ResName=ARG,ResNum=197) 0 -18.861261 -3.551096 -  
6.946234 L  
H-HC-0.032700(PDBName=HB3,ResName=ARG,ResNum=197) 0 -17.585007 -3.055164 -  
8.043894 L  
C-C8-0.039000(PDBName=CG,ResName=ARG,ResNum=197) 0 -16.868097 -4.001249 -  
6.245431 L  
H-HC-0.028500(PDBName=HG2,ResName=ARG,ResNum=197) 0 -15.979691 -3.430408 -  
5.973550 L  
H-HC-0.028500(PDBName=HG3,ResName=ARG,ResNum=197) 0 -17.323814 -4.367031 -  
5.328490 L  
C-C8-0.048600(PDBName=CD,ResName=ARG,ResNum=197) 0 -16.446489 -5.206012 -  
7.095881 H  
H-H1-0.068700(PDBName=HD2,ResName=ARG,ResNum=197) 0 -15.898399 -5.898180 -  
6.440437 H  
H-H1-0.068700(PDBName=HD3,ResName=ARG,ResNum=197) 0 -17.354328 -5.716421 -  
7.443414 H  
N-N2--0.529500(PDBName=NE,ResName=ARG,ResNum=197) 0 -15.612127 -4.754515 -  
8.198187 H  
H-H-0.345600(PDBName=HE,ResName=ARG,ResNum=197) 0 -15.274856 -3.727071 -  
8.192938 H  
C-CA-0.807600(PDBName=CZ,ResName=ARG,ResNum=197) 0 -15.056985 -5.547509 -  
9.092799 H  
N-N2--0.862700(PDBName=NH1,ResName=ARG,ResNum=197) 0 -15.382425 -6.881947 -  
9.243682 H  
H-H-0.447800(PDBName=HH11,ResName=ARG,ResNum=197) 0 -15.881999 -7.306007 -  
8.442920 H  
H-H-0.447800(PDBName=HH12,ResName=ARG,ResNum=197) 0 -14.536535 -7.453534 -  
9.369841 H  
N-N2--0.862700(PDBName=NH2,ResName=ARG,ResNum=197) 0 -14.232411 -4.999901 -  
10.000570 H  
H-H-0.447800(PDBName=HH21,ResName=ARG,ResNum=197) 0 -13.698972 -4.143741 -  
9.741216 H  
H-H-0.447800(PDBName=HH22,ResName=ARG,ResNum=197) 0 -13.731337 -5.671945 -

10.590427 H  
C-C-0.734100(PDBName=C,ResName=ARG,ResNum=197) 0 -18.669752 -0.784388 -  
7.482839 L  
O-O--0.589400(PDBName=O,ResName=ARG,ResNum=197) 0 -18.045708 -0.053784 -  
8.262884 L  
C-CJ--0.316472(PDBName=C1,ResName=DHK,ResNum=225) 0 -11.968027 -1.747290  
0.456414 H  
H-HK-0.158183(PDBName=H2,ResName=DHK,ResNum=225) 0 -12.529681 -0.822500  
0.550257 H  
C-CJ--0.090287(PDBName=C3,ResName=DHK,ResNum=225) 0 -11.592460 -2.482049  
1.589077 H  
H-HK-0.142318(PDBName=H4,ResName=DHK,ResNum=225) 0 -11.864585 -2.126750  
2.578942 H  
C-CJ--0.390043(PDBName=C5,ResName=DHK,ResNum=225) 0 -10.866166 -3.659721  
1.468668 H  
H-HK-0.190546(PDBName=H6,ResName=DHK,ResNum=225) 0 -10.552897 -4.219633  
2.342805 H  
C-CJ-0.446965(PDBName=C7,ResName=DHK,ResNum=225) 0 -10.528546 -4.144405  
0.195793 H  
O-OX--0.642443(PDBName=O8,ResName=DHK,ResNum=225) 0 -9.831578 -5.294937  
0.106185 H  
H-HY-0.433577(PDBName=H9,ResName=DHK,ResNum=225) 0 -9.672500 -5.455157 -  
0.863791 H  
C-CJ--0.168157(PDBName=C10,ResName=DHK,ResNum=225) 0 -10.926952 -3.424536 -  
0.958779 H  
C-CJ-0.254614(PDBName=C11,ResName=DHK,ResNum=225) 0 -10.649172 -3.955553 -  
2.305295 H  
O-OX--0.544517(PDBName=O12,ResName=DHK,ResNum=225) 0 -9.908592 -4.955498 -  
2.444220 H  
H-HY-0.383602(PDBName=H13,ResName=DHK,ResNum=225) 0 -8.052989 -4.745524 -  
3.777091 H  
C-CJ-0.213075(PDBName=C14,ResName=DHK,ResNum=225) 0 -11.623726 -2.210541 -  
0.808855 H  
C-CJ--0.377966(PDBName=C15,ResName=DHK,ResNum=225) 0 -11.885724 -1.368662 -  
2.032777 H  
H-HK-0.179148(PDBName=H16,ResName=DHK,ResNum=225) 0 -12.817368 -0.805596 -  
1.905993 H  
C-CJ-0.165502(PDBName=C17,ResName=DHK,ResNum=225) 0 -11.870163 -2.110994 -

3.340814 H  
C-CZ--0.111477(PDBName=C18,ResName=DHK,ResNum=225) 0 -12.404707 -1.374815 -  
4.531456 H  
H-H8-0.032583(PDBName=H19,ResName=DHK,ResNum=225) 0 -13.356828 -0.893258 -  
4.277043 H  
H-H8-0.032583(PDBName=H20,ResName=DHK,ResNum=225) 0 -11.707268 -0.560980 -  
4.769875 H  
C-CJ--0.377452(PDBName=C21,ResName=DHK,ResNum=225) 0 -11.286379 -3.320212 -  
3.474208 H  
C-CZ-0.692240(PDBName=C22,ResName=DHK,ResNum=225) 0 -11.194682 -4.027438 -  
4.817783 H  
C-CZ--0.555194(PDBName=C23,ResName=DHK,ResNum=225) 0 -12.084921 -5.271670 -  
4.868048 H  
H-H8-0.129933(PDBName=H24,ResName=DHK,ResNum=225) 0 -11.819378 -5.963852 -  
4.063086 H  
H-H8-0.129933(PDBName=H25,ResName=DHK,ResNum=225) 0 -11.951445 -5.804414 -  
5.813597 H  
H-H8-0.129933(PDBName=H26,ResName=DHK,ResNum=225) 0 -13.145621 -5.022891 -  
4.756871 H  
H-H9--0.039392(PDBName=H27,ResName=DHK,ResNum=225) 0 -10.153251 -4.326633 -  
4.972991 H  
O-OI--0.712638(PDBName=O28,ResName=DHK,ResNum=225) 0 -11.477884 -3.153655 -  
5.922487 H  
C-CZ-0.665570(PDBName=C29,ResName=DHK,ResNum=225) 0 -12.597652 -2.282255 -  
5.744970 H  
H-H9--0.064844(PDBName=H30,ResName=DHK,ResNum=225) 0 -13.518278 -2.868338 -  
5.600248 H  
C-CZ--0.289485(PDBName=C31,ResName=DHK,ResNum=225) 0 -12.732787 -1.470221 -  
7.042444 H  
H-H8-0.039536(PDBName=H32,ResName=DHK,ResNum=225) 0 -11.727742 -1.173845 -  
7.351541 H  
H-H8-0.039536(PDBName=H33,ResName=DHK,ResNum=225) 0 -13.333427 -0.577722 -  
6.837546 H  
C-CV-0.810685(PDBName=C34,ResName=DHK,ResNum=225) 0 -13.432270 -2.287125 -  
8.125377 H  
O-O5--0.794847(PDBName=O35,ResName=DHK,ResNum=225) 0 -12.731747 -2.870823 -  
8.990615 H  
O-O5--0.794847(PDBName=O36,ResName=DHK,ResNum=225) 0 -14.706668 -2.328541 -

8.040352 H  
O-O5--0.000000(PDBName=O1,ResName=OXY,ResNum=226) 0 -9.589272 -0.834505 -  
2.183789 H  
O-O5--0.000000(PDBName=O2,ResName=OXY,ResNum=226) 0 -10.924357 -0.268769 -  
2.114707 H  
O-OW--0.834000(PDBName=O,ResName=WAT,ResNum=425) 0 -13.840593 0.948605 -  
0.767251 H  
H-HW-0.417000(PDBName=H1,ResName=WAT,ResNum=425) 0 -13.182767 1.373844 -  
0.179778 H  
H-HW-0.417000(PDBName=H2,ResName=WAT,ResNum=425) 0 -14.610015 0.888627 -  
0.185717 H  
O-OW--0.834000(PDBName=O,ResName=WAT,ResNum=639) 0 -7.719996 -4.661079 -  
4.680052 H  
H-HW-0.417000(PDBName=H1,ResName=WAT,ResNum=639) 0 -9.314699 -0.708318 -  
1.246652 H  
H-HW-0.417000(PDBName=H2,ResName=WAT,ResNum=639) 0 -6.976257 -4.035127 -  
4.627835 H

**<sup>1</sup>TS3 (QM, closed-shell singlet)**

0 1  
N-N--0.415700(PDBName=N,ResName=ASN,ResNum=173) 0 -5.728160 2.998852 -  
2.313299 L  
H-H-0.271900(PDBName=H,ResName=ASN,ResNum=173) 0 -5.897433 2.601095 -  
3.232227 L  
C-CX-0.014300(PDBName=CA,ResName=ASN,ResNum=173) 0 -6.045297 2.159243 -  
1.152530 L  
H-H1-0.104800(PDBName=HA,ResName=ASN,ResNum=173) 0 -6.278656 2.787322 -  
0.291672 L  
C-2C--0.204100(PDBName=CB,ResName=ASN,ResNum=173) 0 -7.274743 1.291482 -  
1.483445 H  
H-HC-0.079700(PDBName=HB2,ResName=ASN,ResNum=173) 0 -8.131899 1.950438 -  
1.621721 H  
H-HC-0.079700(PDBName=HB3,ResName=ASN,ResNum=173) 0 -7.087584 0.761350 -  
2.421225 H  
C-C-0.713000(PDBName=CG,ResName=ASN,ResNum=173) 0 -7.596844 0.322516 -  
0.342213 H  
O-O--0.593100(PDBName=OD1,ResName=ASN,ResNum=173) 0 -8.084210 0.694198  
0.712655 H

|                                                    |   |            |            |   |
|----------------------------------------------------|---|------------|------------|---|
| N-N--0.919100(PDBName=ND2,ResName=ASN,ResNum=173)  | 0 | -7.291319  | -0.990726  | - |
| 0.592016 H                                         |   |            |            |   |
| H-H-0.419600(PDBName=HD21,ResName=ASN,ResNum=173)  | 0 | -7.355378  | -1.629233  |   |
| 0.190453 H                                         |   |            |            |   |
| H-H-0.419600(PDBName=HD22,ResName=ASN,ResNum=173)  | 0 | -6.634287  | -1.256771  | - |
| 1.311226 H                                         |   |            |            |   |
| C-C-0.597300(PDBName=C,ResName=ASN,ResNum=173)     | 0 | -4.873236  | 1.230850   | - |
| 0.788153 L                                         |   |            |            |   |
| O-O--0.567900(PDBName=O,ResName=ASN,ResNum=173)    | 0 | -4.327224  | 0.581302   | - |
| 1.679129 L                                         |   |            |            |   |
| N-N--0.415700(PDBName=N,ResName=TRP,ResNum=177)    | 0 | -5.953648  | -8.135755  |   |
| 5.612489 L                                         |   |            |            |   |
| H-H-0.271900(PDBName=H,ResName=TRP,ResNum=177)     | 0 | -5.068276  | -8.388657  |   |
| 5.182489 L                                         |   |            |            |   |
| C-CX--0.027500(PDBName=CA,ResName=TRP,ResNum=177)  | 0 | -6.835984  | -9.253475  |   |
| 5.954172 L                                         |   |            |            |   |
| H-H1-0.112300(PDBName=HA,ResName=TRP,ResNum=177)   | 0 | -7.599586  | -8.910554  |   |
| 6.651534 L                                         |   |            |            |   |
| C-CT--0.005000(PDBName=CB,ResName=TRP,ResNum=177)  | 0 | -7.527126  | -9.736313  |   |
| 4.664360 H                                         |   |            |            |   |
| H-HC-0.033900(PDBName=HB2,ResName=TRP,ResNum=177)  | 0 | -6.734481  | -10.144513 |   |
| 4.030418 H                                         |   |            |            |   |
| H-HC-0.033900(PDBName=HB3,ResName=TRP,ResNum=177)  | 0 | -8.153889  | -10.593185 |   |
| 4.941695 H                                         |   |            |            |   |
| C-C*-0.141500(PDBName=CG,ResName=TRP,ResNum=177)   | 0 | -8.361646  | -8.764253  |   |
| 3.880522 H                                         |   |            |            |   |
| C-CW--0.163800(PDBName=CD1,ResName=TRP,ResNum=177) | 0 | -7.972322  | -7.959485  |   |
| 2.834854 H                                         |   |            |            |   |
| H-H4-0.206200(PDBName=HD1,ResName=TRP,ResNum=177)  | 0 | -7.001556  | -7.866014  |   |
| 2.365784 H                                         |   |            |            |   |
| N-NA--0.341800(PDBName=NE1,ResName=TRP,ResNum=177) | 0 | -9.034107  | -7.188120  |   |
| 2.394784 H                                         |   |            |            |   |
| H-H-0.341200(PDBName=HE1,ResName=TRP,ResNum=177)   | 0 | -9.063310  | -6.650018  |   |
| 1.536394 H                                         |   |            |            |   |
| C-CN-0.138000(PDBName=CE2,ResName=TRP,ResNum=177)  | 0 | -10.146185 | -7.497316  |   |
| 3.150225 H                                         |   |            |            |   |
| C-CA--0.260100(PDBName=CZ2,ResName=TRP,ResNum=177) | 0 | -11.451593 | -6.995141  |   |
| 3.093795 H                                         |   |            |            |   |



|                                                    |   |            |             |
|----------------------------------------------------|---|------------|-------------|
| H-HA-0.157200(PDBName=HZ2,ResName=TRP,ResNum=177)  | 0 | -11.733699 | -6.235554   |
| 2.371265 H                                         |   |            |             |
| C-CA--0.113400(PDBName=CH2,ResName=TRP,ResNum=177) | 0 | -12.372048 | -7.495607   |
| 4.006611 H                                         |   |            |             |
| H-HA-0.141700(PDBName=HH2,ResName=TRP,ResNum=177)  | 0 | -13.377334 | -7.087882   |
| 4.019242 H                                         |   |            |             |
| C-CA--0.197200(PDBName=CZ3,ResName=TRP,ResNum=177) | 0 | -12.020282 | -8.506472   |
| 4.923627 H                                         |   |            |             |
| H-HA-0.144700(PDBName=HZ3,ResName=TRP,ResNum=177)  | 0 | -12.770081 | -8.901516   |
| 5.603442 H                                         |   |            |             |
| C-CA--0.238700(PDBName=CE3,ResName=TRP,ResNum=177) | 0 | -10.724979 | -9.002031   |
| 4.974357 H                                         |   |            |             |
| H-HA-0.170000(PDBName=HE3,ResName=TRP,ResNum=177)  | 0 | -10.464232 | -9.788167   |
| 5.677673 H                                         |   |            |             |
| C-CB-0.124300(PDBName=CD2,ResName=TRP,ResNum=177)  | 0 | -9.757137  | -8.482561   |
| 4.099447 H                                         |   |            |             |
| C-C-0.597300(PDBName=C,ResName=TRP,ResNum=177)     | 0 | -6.065279  | -10.415839  |
| 6.610067 L                                         |   |            |             |
| O-O--0.567900(PDBName=O,ResName=TRP,ResNum=177)    | 0 | -4.860833  | -10.586997  |
| 6.398365 L                                         |   |            |             |
| N-N--0.347900(PDBName=N,ResName=ARG,ResNum=197)    | 0 | -18.549547 | -1.580084 - |
| 5.131071 L                                         |   |            |             |
| H-H-0.274700(PDBName=H,ResName=ARG,ResNum=197)     | 0 | -18.890238 | -2.441826 - |
| 4.712235 L                                         |   |            |             |
| C-CX--0.263700(PDBName=CA,ResName=ARG,ResNum=197)  | 0 | -17.914560 | -1.647227 - |
| 6.462974 L                                         |   |            |             |
| H-H1-0.156000(PDBName=HA,ResName=ARG,ResNum=197)   | 0 | -16.899141 | -1.251835 - |
| 6.403506 L                                         |   |            |             |
| C-C8--0.000700(PDBName=CB,ResName=ARG,ResNum=197)  | 0 | -17.857166 | -3.098879 - |
| 6.977351 L                                         |   |            |             |
| H-HC-0.032700(PDBName=HB2,ResName=ARG,ResNum=197)  | 0 | -18.847256 | -3.554637 - |
| 6.922761 L                                         |   |            |             |
| H-HC-0.032700(PDBName=HB3,ResName=ARG,ResNum=197)  | 0 | -17.580297 | -3.057982 - |
| 8.031109 L                                         |   |            |             |
| C-C8-0.039000(PDBName=CG,ResName=ARG,ResNum=197)   | 0 | -16.846968 | -3.994048 - |
| 6.234906 L                                         |   |            |             |
| H-HC-0.028500(PDBName=HG2,ResName=ARG,ResNum=197)  | 0 | -15.956671 | -3.419190 - |
| 5.977409 L                                         |   |            |             |

H-HC-0.028500(PDBName=HG3,ResName=ARG,ResNum=197) 0 -17.294106 -4.352247 -  
5.309702 L  
C-C8-0.048600(PDBName=CD,ResName=ARG,ResNum=197) 0 -16.430569 -5.204190 -  
7.082386 H  
H-H1-0.068700(PDBName=HD2,ResName=ARG,ResNum=197) 0 -15.874154 -5.890778 -  
6.428482 H  
H-H1-0.068700(PDBName=HD3,ResName=ARG,ResNum=197) 0 -17.340549 -5.718239 -  
7.418461 H  
N-N2--0.529500(PDBName=NE,ResName=ARG,ResNum=197) 0 -15.608136 -4.759050 -  
8.197847 H  
H-H-0.345600(PDBName=HE,ResName=ARG,ResNum=197) 0 -15.272055 -3.740175 -  
8.202228 H  
C-CA-0.807600(PDBName=CZ,ResName=ARG,ResNum=197) 0 -15.051320 -5.555954 -  
9.090468 H  
N-N2--0.862700(PDBName=NH1,ResName=ARG,ResNum=197) 0 -15.365615 -6.894298 -  
9.225412 H  
H-H-0.447800(PDBName=HH11,ResName=ARG,ResNum=197) 0 -15.864814 -7.315126 -  
8.422886 H  
H-H-0.447800(PDBName=HH12,ResName=ARG,ResNum=197) 0 -14.516518 -7.460364 -  
9.346593 H  
N-N2--0.862700(PDBName=NH2,ResName=ARG,ResNum=197) 0 -14.238388 -5.013765 -  
10.009724 H  
H-H-0.447800(PDBName=HH21,ResName=ARG,ResNum=197) 0 -13.714374 -4.137848 -  
9.783489 H  
H-H-0.447800(PDBName=HH22,ResName=ARG,ResNum=197) 0 -13.741013 -5.691153 -  
10.596926 H  
C-C-0.734100(PDBName=C,ResName=ARG,ResNum=197) 0 -18.664944 -0.788092 -  
7.477999 L  
O-O--0.589400(PDBName=O,ResName=ARG,ResNum=197) 0 -18.043152 -0.062324 -  
8.264161 L  
C-CJ--0.316472(PDBName=C1,ResName=DHK,ResNum=225) 0 -11.210892 -1.649141  
0.253221 H  
H-HK-0.158183(PDBName=H2,ResName=DHK,ResNum=225) 0 -11.509354 -0.613308  
0.355089 H  
C-CJ--0.090287(PDBName=C3,ResName=DHK,ResNum=225) 0 -10.856719 -2.409316  
1.363793 H  
H-HK-0.142318(PDBName=H4,ResName=DHK,ResNum=225) 0 -10.935866 -1.969668  
2.349787 H

C-CJ--0.390043(PDBName=C5,ResName=DHK,ResNum=225) 0 -10.420157 -3.727150  
1.238229 H  
H-HK-0.190546(PDBName=H6,ResName=DHK,ResNum=225) 0 -10.130774 -4.309888  
2.105951 H  
C-CJ-0.446965(PDBName=C7,ResName=DHK,ResNum=225) 0 -10.350698 -4.313046 -  
0.027602 H  
O-OX--0.642443(PDBName=O8,ResName=DHK,ResNum=225) 0 -9.901240 -5.580960 -  
0.136985 H  
H-HY-0.433577(PDBName=H9,ResName=DHK,ResNum=225) 0 -9.947151 -5.809276 -  
1.113435 H  
C-CJ--0.168157(PDBName=C10,ResName=DHK,ResNum=225) 0 -10.775382 -3.579519 -  
1.171498 H  
C-CJ-0.254614(PDBName=C11,ResName=DHK,ResNum=225) 0 -10.778820 -4.213693 -  
2.491625 H  
O-OX--0.544517(PDBName=O12,ResName=DHK,ResNum=225) 0 -10.323019 -5.375753 -  
2.640526 H  
H-HY-0.383602(PDBName=H13,ResName=DHK,ResNum=225) 0 -12.643096 1.540375 -  
2.108674 H  
C-CJ-0.213075(PDBName=C14,ResName=DHK,ResNum=225) 0 -11.181057 -2.234745 -  
1.014175 H  
C-CJ--0.377966(PDBName=C15,ResName=DHK,ResNum=225) 0 -11.680176 -1.499547 -  
2.201305 H  
H-HK-0.179148(PDBName=H16,ResName=DHK,ResNum=225) 0 -13.012920 -1.612360 -  
2.011254 H  
C-CJ-0.165502(PDBName=C17,ResName=DHK,ResNum=225) 0 -11.690003 -2.175139 -  
3.508472 H  
C-CZ--0.111477(PDBName=C18,ResName=DHK,ResNum=225) 0 -12.128050 -1.385138 -  
4.705837 H  
H-H8-0.032583(PDBName=H19,ResName=DHK,ResNum=225) 0 -12.954523 -0.716356 -  
4.440823 H  
H-H8-0.032583(PDBName=H20,ResName=DHK,ResNum=225) 0 -11.299360 -0.738732 -  
5.010806 H  
C-CJ--0.377452(PDBName=C21,ResName=DHK,ResNum=225) 0 -11.329713 -3.483831 -  
3.630668 H  
C-CZ-0.692240(PDBName=C22,ResName=DHK,ResNum=225) 0 -11.398761 -4.211471 -  
4.963743 H  
C-CZ--0.555194(PDBName=C23,ResName=DHK,ResNum=225) 0 -12.479077 -5.297367 -  
4.979058 H

H-H8-0.129933(PDBName=H24,ResName=DHK,ResNum=225) 0 -12.273367 -6.041203 -  
 4.203140 H  
 H-H8-0.129933(PDBName=H25,ResName=DHK,ResNum=225) 0 -12.482913 -5.818110 -  
 5.942846 H  
 H-H8-0.129933(PDBName=H26,ResName=DHK,ResNum=225) 0 -13.478922 -4.888954 -  
 4.801197 H  
 H-H9--0.039392(PDBName=H27,ResName=DHK,ResNum=225) 0 -10.431456 -4.693953 -  
 5.136988 H  
 O-OI--0.712638(PDBName=O28,ResName=DHK,ResNum=225) 0 -11.558554 -3.315921 -  
 6.078073 H  
 C-CZ-0.665570(PDBName=C29,ResName=DHK,ResNum=225) 0 -12.532869 -2.284146 -  
 5.869538 H  
 H-H9--0.064844(PDBName=H30,ResName=DHK,ResNum=225) 0 -13.518000 -2.724597 -  
 5.657764 H  
 C-CZ--0.289485(PDBName=C31,ResName=DHK,ResNum=225) 0 -12.624795 -1.499133 -  
 7.182345 H  
 H-H8-0.039536(PDBName=H32,ResName=DHK,ResNum=225) 0 -11.605729 -1.292746 -  
 7.516215 H  
 H-H8-0.039536(PDBName=H33,ResName=DHK,ResNum=225) 0 -13.149458 -0.556483 -  
 6.991044 H  
 C-CV-0.810685(PDBName=C34,ResName=DHK,ResNum=225) 0 -13.399094 -2.289171 -  
 8.233286 H  
 O-O5--0.794847(PDBName=O35,ResName=DHK,ResNum=225) 0 -12.749723 -2.859958 -  
 9.148441 H  
 O-O5--0.794847(PDBName=O36,ResName=DHK,ResNum=225) 0 -14.663751 -2.325467 -  
 8.076610 H  
 O-O5--0.000000(PDBName=O1,ResName=OXY,ResNum=226) 0 -12.792982 0.711706 -  
 1.597746 H  
 O-O5--0.000000(PDBName=O2,ResName=OXY,ResNum=226) 0 -11.474138 -0.165694 -  
 2.231597 H  
 O-OW--0.834000(PDBName=O,ResName=WAT,ResNum=425) 0 -12.276533 3.214219 -  
 2.730482 H  
 H-HW-0.417000(PDBName=H1,ResName=WAT,ResNum=425) 0 -11.620142 3.362731 -  
 3.426535 H  
 H-HW-0.417000(PDBName=H2,ResName=WAT,ResNum=425) 0 -11.953089 3.717911 -  
 1.969358 H  
 O-OW--0.834000(PDBName=O,ResName=WAT,ResNum=639) 0 -14.201480 -1.212039 -  
 1.777758 H

H-HW-0.417000(PDBName=H1,ResName=WAT,ResNum=639) 0 -13.821699 -0.216813 -  
 1.747983 H  
 H-HW-0.417000(PDBName=H2,ResName=WAT,ResNum=639) 0 -14.344289 -1.440937 -  
 0.844052 H

**<sup>1</sup>EP (QM, closed-shell singlet)**

0 1

N-N--0.415700(PDBName=N,ResName=ASN,ResNum=173) 0 -5.750929 3.016889 -  
 2.299828 L  
 H-H-0.271900(PDBName=H,ResName=ASN,ResNum=173) 0 -5.934411 2.601072 -  
 3.208106 L  
 C-CX-0.014300(PDBName=CA,ResName=ASN,ResNum=173) 0 -6.084678 2.226295 -  
 1.109680 L  
 H-H1-0.104800(PDBName=HA,ResName=ASN,ResNum=173) 0 -6.190821 2.891990 -  
 0.254220 L  
 C-2C--0.204100(PDBName=CB,ResName=ASN,ResNum=173) 0 -7.433791 1.525016 -  
 1.332479 H  
 H-HC-0.079700(PDBName=HB2,ResName=ASN,ResNum=173) 0 -8.183459 2.304098 -  
 1.511840 H  
 H-HC-0.079700(PDBName=HB3,ResName=ASN,ResNum=173) 0 -7.364451 0.908780 -  
 2.233379 H  
 C-C-0.713000(PDBName=CG,ResName=ASN,ResNum=173) 0 -7.871776 0.683035 -  
 0.124864 H  
 O-O--0.593100(PDBName=OD1,ResName=ASN,ResNum=173) 0 -7.626493 0.993761  
 1.033060 H  
 N-N--0.919100(PDBName=ND2,ResName=ASN,ResNum=173) 0 -8.554724 -0.451824 -  
 0.454843 H  
 H-H-0.419600(PDBName=HD21,ResName=ASN,ResNum=173) 0 -8.961492 -0.965966  
 0.313521 H  
 H-H-0.419600(PDBName=HD22,ResName=ASN,ResNum=173) 0 -8.998027 -0.538466 -  
 1.363790 H  
 C-C-0.597300(PDBName=C,ResName=ASN,ResNum=173) 0 -4.971972 1.212027 -  
 0.785985 L  
 O-O--0.567900(PDBName=O,ResName=ASN,ResNum=173) 0 -4.430666 0.594885 -  
 1.701952 L  
 N-N--0.415700(PDBName=N,ResName=TRP,ResNum=177) 0 -5.949992 -8.137188  
 5.621311 L  
 H-H-0.271900(PDBName=H,ResName=TRP,ResNum=177) 0 -5.067159 -8.385904

|                                                    |   |            |            |
|----------------------------------------------------|---|------------|------------|
| 5.183394 L                                         |   |            |            |
| C-CX--0.027500(PDBName=CA,ResName=TRP,ResNum=177)  | 0 | -6.830007  | -9.256979  |
| 5.959408 L                                         |   |            |            |
| H-H1-0.112300(PDBName=HA,ResName=TRP,ResNum=177)   | 0 | -7.595917  | -8.917085  |
| 6.655560 L                                         |   |            |            |
| C-CT--0.005000(PDBName=CB,ResName=TRP,ResNum=177)  | 0 | -7.517289  | -9.742677  |
| 4.669922 H                                         |   |            |            |
| H-HC-0.033900(PDBName=HB2,ResName=TRP,ResNum=177)  | 0 | -6.721563  | -10.134995 |
| 4.030075 H                                         |   |            |            |
| H-HC-0.033900(PDBName=HB3,ResName=TRP,ResNum=177)  | 0 | -8.132158  | -10.609446 |
| 4.942617 H                                         |   |            |            |
| C-C*--0.141500(PDBName=CG,ResName=TRP,ResNum=177)  | 0 | -8.366193  | -8.771873  |
| 3.903361 H                                         |   |            |            |
| C-CW--0.163800(PDBName=CD1,ResName=TRP,ResNum=177) | 0 | -7.986427  | -7.932977  |
| 2.882503 H                                         |   |            |            |
| H-H4-0.206200(PDBName=HD1,ResName=TRP,ResNum=177)  | 0 | -7.016258  | -7.812222  |
| 2.418520 H                                         |   |            |            |
| N-NA--0.341800(PDBName=NE1,ResName=TRP,ResNum=177) | 0 | -9.058537  | -7.163790  |
| 2.464977 H                                         |   |            |            |
| H-H-0.341200(PDBName=HE1,ResName=TRP,ResNum=177)   | 0 | -9.078896  | -6.582034  |
| 1.636900 H                                         |   |            |            |
| C-CN-0.138000(PDBName=CE2,ResName=TRP,ResNum=177)  | 0 | -10.167082 | -7.506611  |
| 3.211334 H                                         |   |            |            |
| C-CA--0.260100(PDBName=CZ2,ResName=TRP,ResNum=177) | 0 | -11.479064 | -7.019114  |
| 3.175681 H                                         |   |            |            |
| H-HA-0.157200(PDBName=HZ2,ResName=TRP,ResNum=177)  | 0 | -11.778463 | -6.242646  |
| 2.478586 H                                         |   |            |            |
| C-CA--0.113400(PDBName=CH2,ResName=TRP,ResNum=177) | 0 | -12.389242 | -7.553994  |
| 4.079530 H                                         |   |            |            |
| H-HA-0.141700(PDBName=HH2,ResName=TRP,ResNum=177)  | 0 | -13.397829 | -7.155828  |
| 4.110228 H                                         |   |            |            |
| C-CA--0.197200(PDBName=CZ3,ResName=TRP,ResNum=177) | 0 | -12.022379 | -8.586075  |
| 4.965945 H                                         |   |            |            |
| H-HA-0.144700(PDBName=HZ3,ResName=TRP,ResNum=177)  | 0 | -12.763370 | -9.006795  |
| 5.639925 H                                         |   |            |            |
| C-CA--0.238700(PDBName=CE3,ResName=TRP,ResNum=177) | 0 | -10.722063 | -9.069589  |
| 4.994493 H                                         |   |            |            |
| H-HA-0.170000(PDBName=HE3,ResName=TRP,ResNum=177)  | 0 | -10.449081 | -9.872956  |

5.673163 H  
C-CB-0.124300(PDBName=CD2,ResName=TRP,ResNum=177) 0 -9.764414 -8.514421  
4.130886 H  
C-C-0.597300(PDBName=C,ResName=TRP,ResNum=177) 0 -6.060263 -10.417411  
6.613511 L  
O-O--0.567900(PDBName=O,ResName=TRP,ResNum=177) 0 -4.854736 -10.587404  
6.407421 L  
N-N--0.347900(PDBName=N,ResName=ARG,ResNum=197) 0 -18.559090 -1.590836 -  
5.163523 L  
H-H-0.274700(PDBName=H,ResName=ARG,ResNum=197) 0 -18.876518 -2.458083 -  
4.737742 L  
C-CX--0.263700(PDBName=CA,ResName=ARG,ResNum=197) 0 -17.923410 -1.652204 -  
6.495061 L  
H-H1-0.156000(PDBName=HA,ResName=ARG,ResNum=197) 0 -16.906561 -1.260232 -  
6.433534 L  
C-C8--0.000700(PDBName=CB,ResName=ARG,ResNum=197) 0 -17.871502 -3.100991 -  
7.017886 L  
H-HC-0.032700(PDBName=HB2,ResName=ARG,ResNum=197) 0 -18.864500 -3.551377 -  
6.972151 L  
H-HC-0.032700(PDBName=HB3,ResName=ARG,ResNum=197) 0 -17.587627 -3.055605 -  
8.069601 L  
C-C8-0.039000(PDBName=CG,ResName=ARG,ResNum=197) 0 -16.871881 -4.006478 -  
6.274397 L  
H-HC-0.028500(PDBName=HG2,ResName=ARG,ResNum=197) 0 -15.982364 -3.437319 -  
6.002842 L  
H-HC-0.028500(PDBName=HG3,ResName=ARG,ResNum=197) 0 -17.328419 -4.372243 -  
5.357288 L  
C-C8-0.048600(PDBName=CD,ResName=ARG,ResNum=197) 0 -16.452940 -5.210432 -  
7.128498 H  
H-H1-0.068700(PDBName=HD2,ResName=ARG,ResNum=197) 0 -15.909881 -5.907261 -  
6.474085 H  
H-H1-0.068700(PDBName=HD3,ResName=ARG,ResNum=197) 0 -17.361700 -5.715884 -  
7.480780 H  
N-N2--0.529500(PDBName=NE,ResName=ARG,ResNum=197) 0 -15.611956 -4.760164 -  
8.227244 H  
H-H-0.345600(PDBName=HE,ResName=ARG,ResNum=197) 0 -15.288850 -3.733193 -  
8.235198 H  
C-CA-0.807600(PDBName=CZ,ResName=ARG,ResNum=197) 0 -15.033338 -5.554208 -

9.107079 H  
N-N2--0.862700(PDBName=NH1,ResName=ARG,ResNum=197) 0 -15.341472 -6.892325 -  
9.250792 H  
H-H-0.447800(PDBName=HH11,ResName=ARG,ResNum=197) 0 -15.854906 -7.317889 -  
8.460030 H  
H-H-0.447800(PDBName=HH12,ResName=ARG,ResNum=197) 0 -14.491228 -7.457391 -  
9.366626 H  
N-N2--0.862700(PDBName=NH2,ResName=ARG,ResNum=197) 0 -14.199665 -5.007325 -  
10.005783 H  
H-H-0.447800(PDBName=HH21,ResName=ARG,ResNum=197) 0 -13.680608 -4.137725 -  
9.763742 H  
H-H-0.447800(PDBName=HH22,ResName=ARG,ResNum=197) 0 -13.696880 -5.678842 -  
10.594541 H  
C-C-0.734100(PDBName=C,ResName=ARG,ResNum=197) 0 -18.671993 -0.786176 -  
7.503878 L  
O-O--0.589400(PDBName=O,ResName=ARG,ResNum=197) 0 -18.051126 -0.054405 -  
8.285158 L  
O-OW--0.834000(PDBName=O,ResName=WAT,ResNum=425) 0 -10.208853 0.022089 -  
2.875572 H  
H-HW-0.417000(PDBName=H1,ResName=WAT,ResNum=425) 0 -10.744331 0.673368 -  
2.376706 H  
H-HW-0.417000(PDBName=H2,ResName=WAT,ResNum=425) 0 -9.667893 0.573481 -  
3.456997 H  
O-OW--0.834000(PDBName=O,ResName=WAT,ResNum=639) 0 -13.063990 0.973590  
0.561795 H  
H-HW-0.417000(PDBName=H1,ResName=WAT,ResNum=639) 0 -11.803622 3.205756  
2.252909 H  
H-HW-0.417000(PDBName=H2,ResName=WAT,ResNum=639) 0 -13.011053 1.462969  
1.411977 H

**'SP (QM, closed-shell singlet)**

0 1  
N-N--0.415700(PDBName=N,ResName=ASN,ResNum=173) 0 -5.757761 3.031872 -  
2.311914 L  
H-H-0.271900(PDBName=H,ResName=ASN,ResNum=173) 0 -5.941383 2.631634 -  
3.226715 L  
C-CX-0.014300(PDBName=CA,ResName=ASN,ResNum=173) 0 -6.113213 2.233228 -  
1.136917 L



|                                                                 |   |           |            |   |
|-----------------------------------------------------------------|---|-----------|------------|---|
| H-H1-0.104800(PDBName=HA,ResName=ASN,ResNum=173)<br>0.279663 L  | 0 | -6.258199 | 2.891184   | - |
| C-2C--0.204100(PDBName=CB,ResName=ASN,ResNum=173)<br>1.400017 H | 0 | -7.433696 | 1.487007   | - |
| H-HC-0.079700(PDBName=HB2,ResName=ASN,ResNum=173)<br>1.559721 H | 0 | -8.224699 | 2.220696   | - |
| H-HC-0.079700(PDBName=HB3,ResName=ASN,ResNum=173)<br>2.314037 H | 0 | -7.323177 | 0.896217   | - |
| C-C-0.713000(PDBName=CG,ResName=ASN,ResNum=173)<br>0.192506 H   | 0 | -7.794872 | 0.618838   | - |
| O-O--0.593100(PDBName=OD1,ResName=ASN,ResNum=173)<br>0.876661 H | 0 | -8.152090 | 1.092178   |   |
| N-N--0.919100(PDBName=ND2,ResName=ASN,ResNum=173)<br>0.360736 H | 0 | -7.576549 | -0.720450  | - |
| H-H-0.419600(PDBName=HD21,ResName=ASN,ResNum=173)<br>0.375828 H | 0 | -7.889468 | -1.336588  |   |
| H-H-0.419600(PDBName=HD22,ResName=ASN,ResNum=173)<br>1.272606 H | 0 | -7.511014 | -1.144608  | - |
| C-C-0.597300(PDBName=C,ResName=ASN,ResNum=173)<br>0.799045 L    | 0 | -5.002749 | 1.222056   | - |
| O-O--0.567900(PDBName=O,ResName=ASN,ResNum=173)<br>1.702613 L   | 0 | -4.495771 | 0.555922   | - |
| N-N--0.415700(PDBName=N,ResName=TRP,ResNum=177)<br>5.636287 L   | 0 | -5.929369 | -8.131503  |   |
| H-H-0.271900(PDBName=H,ResName=TRP,ResNum=177)<br>5.220560 L    | 0 | -5.033651 | -8.371002  |   |
| C-CX--0.027500(PDBName=CA,ResName=TRP,ResNum=177)<br>5.941633 L | 0 | -6.805496 | -9.263651  |   |
| H-H1-0.112300(PDBName=HA,ResName=TRP,ResNum=177)<br>6.603273 L  | 0 | -7.608837 | -8.940283  |   |
| C-CT--0.005000(PDBName=CB,ResName=TRP,ResNum=177)<br>4.622174 H | 0 | -7.417679 | -9.762193  |   |
| H-HC-0.033900(PDBName=HB2,ResName=TRP,ResNum=177)<br>3.955543 H | 0 | -6.578333 | -9.978159  |   |
| H-HC-0.033900(PDBName=HB3,ResName=TRP,ResNum=177)<br>4.831712 H | 0 | -7.890522 | -10.729314 |   |
| C-C*-0.141500(PDBName=CG,ResName=TRP,ResNum=177)<br>3.949604 H  | 0 | -8.424084 | -8.884163  |   |

|                                                    |   |            |             |
|----------------------------------------------------|---|------------|-------------|
| C-CW--0.163800(PDBName=CD1,ResName=TRP,ResNum=177) | 0 | -8.240684  | -7.929851   |
| 2.978862 H                                         |   |            |             |
| H-H4-0.206200(PDBName=HD1,ResName=TRP,ResNum=177)  | 0 | -7.332711  | -7.632355   |
| 2.470827 H                                         |   |            |             |
| N-NA--0.341800(PDBName=NE1,ResName=TRP,ResNum=177) | 0 | -9.441319  | -7.303117   |
| 2.688144 H                                         |   |            |             |
| H-H-0.341200(PDBName=HE1,ResName=TRP,ResNum=177)   | 0 | -9.599735  | -6.675249   |
| 1.909041 H                                         |   |            |             |
| C-CN-0.138000(PDBName=CE2,ResName=TRP,ResNum=177)  | 0 | -10.431313 | -7.855449   |
| 3.473856 H                                         |   |            |             |
| C-CA--0.260100(PDBName=CZ2,ResName=TRP,ResNum=177) | 0 | -11.796653 | -7.566246   |
| 3.583199 H                                         |   |            |             |
| H-HA-0.157200(PDBName=HZ2,ResName=TRP,ResNum=177)  | 0 | -12.275813 | -6.813750   |
| 2.968035 H                                         |   |            |             |
| C-CA--0.113400(PDBName=CH2,ResName=TRP,ResNum=177) | 0 | -12.535653 | -8.280789   |
| 4.517207 H                                         |   |            |             |
| H-HA-0.141700(PDBName=HH2,ResName=TRP,ResNum=177)  | 0 | -13.574225 | -8.021945   |
| 4.671405 H                                         |   |            |             |
| C-CA--0.197200(PDBName=CZ3,ResName=TRP,ResNum=177) | 0 | -11.962668 | -9.317066   |
| 5.277448 H                                         |   |            |             |
| H-HA-0.144700(PDBName=HZ3,ResName=TRP,ResNum=177)  | 0 | -12.578563 | -9.886549   |
| 5.968537 H                                         |   |            |             |
| C-CA--0.238700(PDBName=CE3,ResName=TRP,ResNum=177) | 0 | -10.615368 | -9.615999   |
| 5.149707 H                                         |   |            |             |
| H-HA-0.170000(PDBName=HE3,ResName=TRP,ResNum=177)  | 0 | -10.176169 | -10.433966  |
| 5.711090 H                                         |   |            |             |
| C-CB-0.124300(PDBName=CD2,ResName=TRP,ResNum=177)  | 0 | -9.823248  | -8.857176   |
| 4.276481 H                                         |   |            |             |
| C-C-0.597300(PDBName=C,ResName=TRP,ResNum=177)     | 0 | -6.050790  | -10.414271  |
| 6.622122 L                                         |   |            |             |
| O-O--0.567900(PDBName=O,ResName=TRP,ResNum=177)    | 0 | -4.843857  | -10.589316  |
| 6.428915 L                                         |   |            |             |
| N-N--0.347900(PDBName=N,ResName=ARG,ResNum=197)    | 0 | -18.574156 | -1.568145 - |
| 5.147197 L                                         |   |            |             |
| H-H-0.274700(PDBName=H,ResName=ARG,ResNum=197)     | 0 | -18.909555 | -2.428246 - |
| 4.721270 L                                         |   |            |             |
| C-CX--0.263700(PDBName=CA,ResName=ARG,ResNum=197)  | 0 | -17.939369 | -1.641349 - |
| 6.477751 L                                         |   |            |             |

H-H1-0.156000(PDBName=HA,ResName=ARG,ResNum=197) 0 -16.921465 -1.251599 -  
 6.419609 L  
 C-C8--0.000700(PDBName=CB,ResName=ARG,ResNum=197) 0 -17.892807 -3.094119 -  
 6.988514 L  
 H-HC-0.032700(PDBName=HB2,ResName=ARG,ResNum=197) 0 -18.888010 -3.539356 -  
 6.943886 L  
 H-HC-0.032700(PDBName=HB3,ResName=ARG,ResNum=197) 0 -17.605192 -3.058118 -  
 8.039504 L  
 C-C8-0.039000(PDBName=CG,ResName=ARG,ResNum=197) 0 -16.900837 -3.996963 -  
 6.230864 L  
 H-HC-0.028500(PDBName=HG2,ResName=ARG,ResNum=197) 0 -16.022572 -3.422934 -  
 5.934099 L  
 H-HC-0.028500(PDBName=HG3,ResName=ARG,ResNum=197) 0 -17.373182 -4.375696 -  
 5.327732 L  
 C-C8-0.048600(PDBName=CD,ResName=ARG,ResNum=197) 0 -16.452517 -5.189984 -  
 7.083826 H  
 H-H1-0.068700(PDBName=HD2,ResName=ARG,ResNum=197) 0 -15.908187 -5.881935 -  
 6.425118 H  
 H-H1-0.068700(PDBName=HD3,ResName=ARG,ResNum=197) 0 -17.348801 -5.706390 -  
 7.451396 H  
 N-N2--0.529500(PDBName=NE,ResName=ARG,ResNum=197) 0 -15.604320 -4.720685 -  
 8.168340 H  
 H-H-0.345600(PDBName=HE,ResName=ARG,ResNum=197) 0 -15.273649 -3.688240 -  
 8.145592 H  
 C-CA-0.807600(PDBName=CZ,ResName=ARG,ResNum=197) 0 -15.042213 -5.498157 -  
 9.070371 H  
 N-N2--0.862700(PDBName=NH1,ResName=ARG,ResNum=197) 0 -15.360337 -6.832735 -  
 9.241489 H  
 H-H-0.447800(PDBName=HH11,ResName=ARG,ResNum=197) 0 -15.857123 -7.269505 -  
 8.445615 H  
 H-H-0.447800(PDBName=HH12,ResName=ARG,ResNum=197) 0 -14.509676 -7.396551 -  
 9.369871 H  
 N-N2--0.862700(PDBName=NH2,ResName=ARG,ResNum=197) 0 -14.214175 -4.935289 -  
 9.967414 H  
 H-H-0.447800(PDBName=HH21,ResName=ARG,ResNum=197) 0 -13.688561 -4.081310 -  
 9.696179 H  
 H-H-0.447800(PDBName=HH22,ResName=ARG,ResNum=197) 0 -13.715750 -5.595938 -  
 10.571720 H

|                                                                  |   |            |           |   |
|------------------------------------------------------------------|---|------------|-----------|---|
| C-C-0.734100(PDBName=C,ResName=ARG,ResNum=197)<br>7.491904 L     | 0 | -18.684425 | -0.778351 | - |
| O-O--0.589400(PDBName=O,ResName=ARG,ResNum=197)<br>8.278735 L    | 0 | -18.059708 | -0.056423 | - |
| C-CJ--0.316472(PDBName=C1,ResName=DHK,ResNum=225)<br>0.427789 H  | 0 | -12.732234 | -2.363417 |   |
| H-HK-0.158183(PDBName=H2,ResName=DHK,ResNum=225)<br>0.525750 H   | 0 | -13.285189 | -1.435104 |   |
| C-CJ--0.090287(PDBName=C3,ResName=DHK,ResNum=225)<br>1.482302 H  | 0 | -12.668038 | -3.279967 |   |
| H-HK-0.142318(PDBName=H4,ResName=DHK,ResNum=225)<br>2.403952 H   | 0 | -13.210445 | -3.096111 |   |
| C-CJ--0.390043(PDBName=C5,ResName=DHK,ResNum=225)<br>1.383978 H  | 0 | -11.877802 | -4.419728 |   |
| H-HK-0.190546(PDBName=H6,ResName=DHK,ResNum=225)<br>2.227526 H   | 0 | -11.779588 | -5.090180 |   |
| C-CJ-0.446965(PDBName=C7,ResName=DHK,ResNum=225)<br>0.209985 H   | 0 | -11.162961 | -4.701390 |   |
| O-OX--0.642443(PDBName=O8,ResName=DHK,ResNum=225)<br>0.203108 H  | 0 | -10.347629 | -5.795593 |   |
| H-HY-0.433577(PDBName=H9,ResName=DHK,ResNum=225)<br>0.656521 H   | 0 | -9.885496  | -5.827460 | - |
| C-CJ--0.168157(PDBName=C10,ResName=DHK,ResNum=225)<br>0.881399 H | 0 | -11.292532 | -3.839415 | - |
| C-CJ-0.254614(PDBName=C11,ResName=DHK,ResNum=225)<br>2.151848 H  | 0 | -10.469754 | -3.827729 | - |
| O-OX--0.544517(PDBName=O12,ResName=DHK,ResNum=225)<br>2.283879 H | 0 | -9.667855  | -4.948133 | - |
| H-HY-0.383602(PDBName=H13,ResName=DHK,ResNum=225)<br>2.949614 H  | 0 | -8.958988  | -4.786746 | - |
| C-CJ-0.213075(PDBName=C14,ResName=DHK,ResNum=225)<br>0.731817 H  | 0 | -12.026045 | -2.653095 | - |
| C-CJ--0.377966(PDBName=C15,ResName=DHK,ResNum=225)<br>1.836386 H | 0 | -11.710844 | -1.687083 | - |
| H-HK-0.179148(PDBName=H16,ResName=DHK,ResNum=225)<br>1.697173 H  | 0 | -12.119545 | -0.687457 | - |
| C-CJ-0.165502(PDBName=C17,ResName=DHK,ResNum=225)<br>3.207525 H  | 0 | -11.912050 | -2.255346 | - |

C-CZ--0.111477(PDBName=C18,ResName=DHK,ResNum=225) 0 -12.532088 -1.489915 -  
 4.334032 H  
 H-H8-0.032583(PDBName=H19,ResName=DHK,ResNum=225) 0 -13.527109 -1.116187 -  
 4.059133 H  
 H-H8-0.032583(PDBName=H20,ResName=DHK,ResNum=225) 0 -11.915055 -0.599765 -  
 4.514909 H  
 C-CJ--0.377452(PDBName=C21,ResName=DHK,ResNum=225) 0 -11.269915 -3.417072 -  
 3.379197 H  
 C-CZ-0.692240(PDBName=C22,ResName=DHK,ResNum=225) 0 -11.209631 -4.109048 -  
 4.721832 H  
 C-CZ--0.555194(PDBName=C23,ResName=DHK,ResNum=225) 0 -12.108658 -5.346731 -  
 4.764138 H  
 H-H8-0.129933(PDBName=H24,ResName=DHK,ResNum=225) 0 -11.826700 -6.043637 -  
 3.967914 H  
 H-H8-0.129933(PDBName=H25,ResName=DHK,ResNum=225) 0 -12.011852 -5.875890 -  
 5.717557 H  
 H-H8-0.129933(PDBName=H26,ResName=DHK,ResNum=225) 0 -13.160918 -5.089191 -  
 4.613224 H  
 H-H9--0.039392(PDBName=H27,ResName=DHK,ResNum=225) 0 -10.178289 -4.417995 -  
 4.927701 H  
 O-OI--0.712638(PDBName=O28,ResName=DHK,ResNum=225) 0 -11.514805 -3.203561 -  
 5.797289 H  
 C-CZ-0.665570(PDBName=C29,ResName=DHK,ResNum=225) 0 -12.657839 -2.351946 -  
 5.598068 H  
 H-H9--0.064844(PDBName=H30,ResName=DHK,ResNum=225) 0 -13.565008 -2.967803 -  
 5.507991 H  
 C-CZ--0.289485(PDBName=C31,ResName=DHK,ResNum=225) 0 -12.776436 -1.487267 -  
 6.866402 H  
 H-H8-0.039536(PDBName=H32,ResName=DHK,ResNum=225) 0 -11.771571 -1.158313 -  
 7.143335 H  
 H-H8-0.039536(PDBName=H33,ResName=DHK,ResNum=225) 0 -13.393077 -0.613264 -  
 6.632348 H  
 C-CV-0.810685(PDBName=C34,ResName=DHK,ResNum=225) 0 -13.444911 -2.254133 -  
 8.006938 H  
 O-O5--0.794847(PDBName=O35,ResName=DHK,ResNum=225) 0 -12.724460 -2.795557 -  
 8.884009 H  
 O-O5--0.794847(PDBName=O36,ResName=DHK,ResNum=225) 0 -14.721834 -2.298220 -  
 7.961292 H

O-O5--0.000000(PDBName=O1,ResName=OXY,ResNum=226) 0 -9.499880 -2.696930 -  
1.925732 H  
O-O5--0.000000(PDBName=O2,ResName=OXY,ResNum=226) 0 -10.239441 -1.459231 -  
1.684716 H  
O-OW--0.834000(PDBName=O,ResName=WAT,ResNum=425) 0 -10.677197 1.011583 -  
2.627310 H  
H-HW-0.417000(PDBName=H1,ResName=WAT,ResNum=425) 0 -10.133425 0.244631 -  
2.385858 H  
H-HW-0.417000(PDBName=H2,ResName=WAT,ResNum=425) 0 -10.976048 1.342451 -  
1.757371 H  
O-OW--0.834000(PDBName=O,ResName=WAT,ResNum=639) 0 -7.673061 -4.710906 -  
4.218192 H  
H-HW-0.417000(PDBName=H1,ResName=WAT,ResNum=639) 0 -6.971976 -4.058452 -  
4.403930 H  
H-HW-0.417000(PDBName=H2,ResName=WAT,ResNum=639) 0 -7.277669 -5.566762 -  
4.449720 H

**<sup>o</sup>M1 (L4)**

0 1

N-N--0.415700(PDBName=N,ResName=ASN,ResNum=173) 0 -5.737309 3.010909 -  
2.313060 L  
H-H-0.271900(PDBName=H,ResName=ASN,ResNum=173) 0 -5.907265 2.609623 -  
3.230405 L  
C-CX-0.014300(PDBName=CA,ResName=ASN,ResNum=173) 0 -6.091741 2.197879 -  
1.145626 L  
H-H1-0.104800(PDBName=HA,ResName=ASN,ResNum=173) 0 -6.278759 2.846546 -  
0.289559 L  
C-2C--0.204100(PDBName=CB,ResName=ASN,ResNum=173) 0 -7.379637 1.411376 -  
1.455257 H  
H-HC-0.079700(PDBName=HB2,ResName=ASN,ResNum=173) 0 -8.184889 2.114771 -  
1.652720 H  
H-HC-0.079700(PDBName=HB3,ResName=ASN,ResNum=173) 0 -7.216425 0.812995 -  
2.356179 H  
C-C-0.713000(PDBName=CG,ResName=ASN,ResNum=173) 0 -7.817830 0.528226 -  
0.287474 H  
O-O--0.593100(PDBName=OD1,ResName=ASN,ResNum=173) 0 -8.564377 0.929001  
0.600174 H  
N-N--0.919100(PDBName=ND2,ResName=ASN,ResNum=173) 0 -7.299919 -0.730810 -

|                                                    |   |            |             |
|----------------------------------------------------|---|------------|-------------|
| 0.268842 H                                         |   |            |             |
| H-H-0.419600(PDBName=HD21,ResName=ASN,ResNum=173)  | 0 | -7.630476  | -1.365846   |
| 0.442886 H                                         |   |            |             |
| H-H-0.419600(PDBName=HD22,ResName=ASN,ResNum=173)  | 0 | -6.818472  | -1.162699 - |
| 1.045201 H                                         |   |            |             |
| C-C-0.597300(PDBName=C,ResName=ASN,ResNum=173)     | 0 | -4.966681  | 1.210573 -  |
| 0.792228 L                                         |   |            |             |
| O-O--0.567900(PDBName=O,ResName=ASN,ResNum=173)    | 0 | -4.489667  | 0.503392 -  |
| 1.680220 L                                         |   |            |             |
| N-N--0.415700(PDBName=N,ResName=TRP,ResNum=177)    | 0 | -5.952887  | -8.130648   |
| 5.618852 L                                         |   |            |             |
| H-H-0.271900(PDBName=H,ResName=TRP,ResNum=177)     | 0 | -5.064770  | -8.385143   |
| 5.195737 L                                         |   |            |             |
| C-CX--0.027500(PDBName=CA,ResName=TRP,ResNum=177)  | 0 | -6.839893  | -9.246734   |
| 5.953134 L                                         |   |            |             |
| H-H1-0.112300(PDBName=HA,ResName=TRP,ResNum=177)   | 0 | -7.604034  | -8.904858   |
| 6.650552 L                                         |   |            |             |
| C-CT--0.005000(PDBName=CB,ResName=TRP,ResNum=177)  | 0 | -7.529131  | -9.719215   |
| 4.658139 H                                         |   |            |             |
| H-HC-0.033900(PDBName=HB2,ResName=TRP,ResNum=177)  | 0 | -6.736997  | -10.122591  |
| 4.020250 H                                         |   |            |             |
| H-HC-0.033900(PDBName=HB3,ResName=TRP,ResNum=177)  | 0 | -8.159997  | -10.575605  |
| 4.927501 H                                         |   |            |             |
| C-C*-0.141500(PDBName=CG,ResName=TRP,ResNum=177)   | 0 | -8.359943  | -8.739192   |
| 3.881062 H                                         |   |            |             |
| C-CW--0.163800(PDBName=CD1,ResName=TRP,ResNum=177) | 0 | -7.968180  | -7.923904   |
| 2.845004 H                                         |   |            |             |
| H-H4-0.206200(PDBName=HD1,ResName=TRP,ResNum=177)  | 0 | -6.995209  | -7.823373   |
| 2.382153 H                                         |   |            |             |
| N-NA--0.341800(PDBName=NE1,ResName=TRP,ResNum=177) | 0 | -9.032645  | -7.151558   |
| 2.409625 H                                         |   |            |             |
| H-H-0.341200(PDBName=HE1,ResName=TRP,ResNum=177)   | 0 | -9.059731  | -6.587566   |
| 1.570251 H                                         |   |            |             |
| C-CN-0.138000(PDBName=CE2,ResName=TRP,ResNum=177)  | 0 | -10.146938 | -7.472210   |
| 3.156650 H                                         |   |            |             |
| C-CA--0.260100(PDBName=CZ2,ResName=TRP,ResNum=177) | 0 | -11.457409 | -6.984139   |
| 3.094817 H                                         |   |            |             |
| H-HA-0.157200(PDBName=HZ2,ResName=TRP,ResNum=177)  | 0 | -11.748412 | -6.232872   |

2.368297 H  
C-CA--0.113400(PDBName=CH2,ResName=TRP,ResNum=177) 0 -12.375230 -7.494590  
4.005272 H  
H-HA-0.141700(PDBName=HH2,ResName=TRP,ResNum=177) 0 -13.383559 -7.095058  
4.015666 H  
C-CA--0.197200(PDBName=CZ3,ResName=TRP,ResNum=177) 0 -12.017980 -8.505091  
4.921041 H  
H-HA-0.144700(PDBName=HZ3,ResName=TRP,ResNum=177) 0 -12.766297 -8.906406  
5.598601 H  
C-CA--0.238700(PDBName=CE3,ResName=TRP,ResNum=177) 0 -10.719776 -8.993856  
4.970152 H  
H-HA-0.170000(PDBName=HE3,ResName=TRP,ResNum=177) 0 -10.451366 -9.782160  
5.667897 H  
C-CB-0.124300(PDBName=CD2,ResName=TRP,ResNum=177) 0 -9.755555 -8.462681  
4.099467 H  
C-C-0.597300(PDBName=C,ResName=TRP,ResNum=177) 0 -6.072030 -10.412625  
6.606711 L  
O-O--0.567900(PDBName=O,ResName=TRP,ResNum=177) 0 -4.868948 -10.587261  
6.389941 L  
N-N--0.347900(PDBName=N,ResName=ARG,ResNum=197) 0 -18.567184 -1.559773 -  
5.133966 L  
H-H-0.274700(PDBName=H,ResName=ARG,ResNum=197) 0 -18.897896 -2.422069 -  
4.708502 L  
C-CX--0.263700(PDBName=CA,ResName=ARG,ResNum=197) 0 -17.924006 -1.629992 -  
6.459900 L  
H-H1-0.156000(PDBName=HA,ResName=ARG,ResNum=197) 0 -16.913931 -1.220948 -  
6.397516 L  
C-C8--0.000700(PDBName=CB,ResName=ARG,ResNum=197) 0 -17.843300 -3.087361 -  
6.952500 L  
H-HC-0.032700(PDBName=HB2,ResName=ARG,ResNum=197) 0 -18.828295 -3.554774 -  
6.904594 L  
H-HC-0.032700(PDBName=HB3,ResName=ARG,ResNum=197) 0 -17.551813 -3.058797 -  
8.002571 L  
C-C8-0.039000(PDBName=CG,ResName=ARG,ResNum=197) 0 -16.832096 -3.953124 -  
6.174929 L  
H-HC-0.028500(PDBName=HG2,ResName=ARG,ResNum=197) 0 -15.969796 -3.352035 -  
5.886409 L  
H-HC-0.028500(PDBName=HG3,ResName=ARG,ResNum=197) 0 -17.297688 -4.325778 -



5.265603 L  
C-C8-0.048600(PDBName=CD,ResName=ARG,ResNum=197) 0 -16.348574 -5.150424 -  
7.002498 H  
H-H1-0.068700(PDBName=HD2,ResName=ARG,ResNum=197) 0 -15.782254 -5.814496 -  
6.333240 H  
H-H1-0.068700(PDBName=HD3,ResName=ARG,ResNum=197) 0 -17.230947 -5.698591 -  
7.358241 H  
N-N2--0.529500(PDBName=NE,ResName=ARG,ResNum=197) 0 -15.517639 -4.678263 -  
8.098251 H  
H-H-0.345600(PDBName=HE,ResName=ARG,ResNum=197) 0 -15.215945 -3.634122 -  
8.098874 H  
C-CA-0.807600(PDBName=CZ,ResName=ARG,ResNum=197) 0 -14.982383 -5.450837 -  
9.019335 H  
N-N2--0.862700(PDBName=NH1,ResName=ARG,ResNum=197) 0 -15.297055 -6.787452 -  
9.181908 H  
H-H-0.447800(PDBName=HH11,ResName=ARG,ResNum=197) 0 -15.780232 -7.229206 -  
8.381142 H  
H-H-0.447800(PDBName=HH12,ResName=ARG,ResNum=197) 0 -14.449095 -7.349524 -  
9.329947 H  
N-N2--0.862700(PDBName=NH2,ResName=ARG,ResNum=197) 0 -14.188281 -4.881550 -  
9.943679 H  
H-H-0.447800(PDBName=HH21,ResName=ARG,ResNum=197) 0 -13.669290 -4.019117 -  
9.694261 H  
H-H-0.447800(PDBName=HH22,ResName=ARG,ResNum=197) 0 -13.701463 -5.536971 -  
10.562857 H  
C-C-0.734100(PDBName=C,ResName=ARG,ResNum=197) 0 -18.675800 -0.784769 -  
7.485285 L  
O-O--0.589400(PDBName=O,ResName=ARG,ResNum=197) 0 -18.055456 -0.066046 -  
8.278714 L  
C-CJ--0.316472(PDBName=C1,ResName=DHK,ResNum=225) 0 -11.922064 -1.881186  
0.525695 H  
H-HK-0.158183(PDBName=H2,ResName=DHK,ResNum=225) 0 -12.386427 -0.911564  
0.668302 H  
C-CJ--0.090287(PDBName=C3,ResName=DHK,ResNum=225) 0 -11.401579 -2.583162  
1.610070 H  
H-HK-0.142318(PDBName=H4,ResName=DHK,ResNum=225) 0 -11.489098 -2.172433  
2.609822 H  
C-CJ--0.390043(PDBName=C5,ResName=DHK,ResNum=225) 0 -10.757611 -3.806707

1.429499 H  
H-HK-0.190546(PDBName=H6,ResName=DHK,ResNum=225) 0 -10.329374 -4.349094  
2.265167 H  
C-CJ-0.446965(PDBName=C7,ResName=DHK,ResNum=225) 0 -10.653647 -4.362191  
0.143258 H  
O-OX--0.642443(PDBName=O8,ResName=DHK,ResNum=225) 0 -10.027025 -5.545572  
0.004167 H  
H-HY-0.433577(PDBName=H9,ResName=DHK,ResNum=225) 0 -10.062912 -5.767234 -  
0.971473 H  
C-CJ--0.168157(PDBName=C10,ResName=DHK,ResNum=225) 0 -11.201423 -3.681932 -  
0.971147 H  
C-CJ-0.254614(PDBName=C11,ResName=DHK,ResNum=225) 0 -11.073194 -4.215886 -  
2.313227 H  
O-OX--0.544517(PDBName=O12,ResName=DHK,ResNum=225) 0 -10.467606 -5.329525 -  
2.505833 H  
H-HY-0.383602(PDBName=H13,ResName=DHK,ResNum=225) 0 -9.082821 -5.126911 -  
3.497623 H  
C-CJ-0.213075(PDBName=C14,ResName=DHK,ResNum=225) 0 -11.814859 -2.410891 -  
0.775497 H  
C-CJ--0.377966(PDBName=C15,ResName=DHK,ResNum=225) 0 -12.253387 -1.684970 -  
1.915481 H  
H-HK-0.179148(PDBName=H16,ResName=DHK,ResNum=225) 0 -12.658211 -0.689390 -  
1.769059 H  
C-CJ-0.165502(PDBName=C17,ResName=DHK,ResNum=225) 0 -12.119022 -2.187102 -  
3.218508 H  
C-CZ--0.111477(PDBName=C18,ResName=DHK,ResNum=225) 0 -12.465906 -1.323739 -  
4.404500 H  
H-H8-0.032583(PDBName=H19,ResName=DHK,ResNum=225) 0 -13.330112 -0.692009 -  
4.176151 H  
H-H8-0.032583(PDBName=H20,ResName=DHK,ResNum=225) 0 -11.619470 -0.647788 -  
4.579916 H  
C-CJ--0.377452(PDBName=C21,ResName=DHK,ResNum=225) 0 -11.604608 -3.461502 -  
3.428554 H  
C-CZ-0.692240(PDBName=C22,ResName=DHK,ResNum=225) 0 -11.554522 -4.078978 -  
4.811036 H  
C-CZ--0.555194(PDBName=C23,ResName=DHK,ResNum=225) 0 -12.576864 -5.218010 -  
4.942619 H  
H-H8-0.129933(PDBName=H24,ResName=DHK,ResNum=225) 0 -12.357770 -6.010949 -

4.219738 H  
H-H8-0.129933(PDBName=H25,ResName=DHK,ResNum=225) 0 -12.530158 -5.650520 -  
5.946782 H  
H-H8-0.129933(PDBName=H26,ResName=DHK,ResNum=225) 0 -13.598520 -4.868798 -  
4.764498 H  
H-H9--0.039392(PDBName=H27,ResName=DHK,ResNum=225) 0 -10.553580 -4.488821 -  
4.973782 H  
O-OI--0.712638(PDBName=O28,ResName=DHK,ResNum=225) 0 -11.718055 -3.127820 -  
5.865801 H  
C-CZ-0.665570(PDBName=C29,ResName=DHK,ResNum=225) 0 -12.749971 -2.154024 -  
5.653376 H  
H-H9--0.064844(PDBName=H30,ResName=DHK,ResNum=225) 0 -13.723417 -2.653699 -  
5.534264 H  
C-CZ--0.289485(PDBName=C31,ResName=DHK,ResNum=225) 0 -12.799814 -1.316893 -  
6.936278 H  
H-H8-0.039536(PDBName=H32,ResName=DHK,ResNum=225) 0 -11.778605 -1.027704 -  
7.195716 H  
H-H8-0.039536(PDBName=H33,ResName=DHK,ResNum=225) 0 -13.404223 -0.422785 -  
6.752292 H  
C-CV-0.810685(PDBName=C34,ResName=DHK,ResNum=225) 0 -13.452387 -2.138123 -  
8.047250 H  
O-O5--0.794847(PDBName=O35,ResName=DHK,ResNum=225) 0 -12.727637 -2.684914 -  
8.914526 H  
O-O5--0.794847(PDBName=O36,ResName=DHK,ResNum=225) 0 -14.725595 -2.230840 -  
7.970662 H  
O-O5--0.000000(PDBName=O1,ResName=OXY,ResNum=226) 0 -7.682512 -2.818806 -  
2.328558 H  
O-O5--0.000000(PDBName=O2,ResName=OXY,ResNum=226) 0 -8.924258 -2.345545 -  
2.314083 H  
O-OW--0.834000(PDBName=O,ResName=WAT,ResNum=425) 0 -10.203074 0.311533 -  
2.084248 H  
H-HW-0.417000(PDBName=H1,ResName=WAT,ResNum=425) 0 -9.682421 -0.501023 -  
1.970019 H  
H-HW-0.417000(PDBName=H2,ResName=WAT,ResNum=425) 0 -10.292305 0.637993 -  
1.172997 H  
O-OW--0.834000(PDBName=O,ResName=WAT,ResNum=639) 0 -8.298872 -4.742006 -  
3.960679 H  
H-HW-0.417000(PDBName=H1,ResName=WAT,ResNum=639) 0 -7.748592 -3.613389 -

2.962253 H  
H-HW-0.417000(PDBName=H2,ResName=WAT,ResNum=639) 0 -7.732200 -5.488827 -  
4.208514 H

**OSTS2 (L4)**

0 1  
N-N--0.415700(PDBName=N,ResName=ASN,ResNum=173) 0 -5.757116 3.026149 -  
2.309052 L  
H-H-0.271900(PDBName=H,ResName=ASN,ResNum=173) 0 -5.925573 2.611073 -  
3.220445 L  
C-CX-0.014300(PDBName=CA,ResName=ASN,ResNum=173) 0 -6.124401 2.247762 -  
1.123925 L  
H-H1-0.104800(PDBName=HA,ResName=ASN,ResNum=173) 0 -6.228560 2.914796 -  
0.268166 L  
C-2C--0.204100(PDBName=CB,ResName=ASN,ResNum=173) 0 -7.477292 1.557603 -  
1.360682 H  
H-HC-0.079700(PDBName=HB2,ResName=ASN,ResNum=173) 0 -8.235136 2.320046 -  
1.535191 H  
H-HC-0.079700(PDBName=HB3,ResName=ASN,ResNum=173) 0 -7.406279 0.926506 -  
2.251680 H  
C-C-0.713000(PDBName=CG,ResName=ASN,ResNum=173) 0 -7.908959 0.761599 -  
0.130422 H  
O-O--0.593100(PDBName=OD1,ResName=ASN,ResNum=173) 0 -8.386229 1.300112  
0.863197 H  
N-N--0.919100(PDBName=ND2,ResName=ASN,ResNum=173) 0 -7.706355 -0.583667 -  
0.191161 H  
H-H-0.419600(PDBName=HD21,ResName=ASN,ResNum=173) 0 -8.045609 -1.144351  
0.576793 H  
H-H-0.419600(PDBName=HD22,ResName=ASN,ResNum=173) 0 -7.462169 -1.082817 -  
1.033551 H  
C-C-0.597300(PDBName=C,ResName=ASN,ResNum=173) 0 -5.052727 1.195315 -  
0.801149 L  
O-O--0.567900(PDBName=O,ResName=ASN,ResNum=173) 0 -4.622705 0.479475 -  
1.705416 L  
N-N--0.415700(PDBName=N,ResName=TRP,ResNum=177) 0 -5.956688 -8.133509  
5.617840 L  
H-H-0.271900(PDBName=H,ResName=TRP,ResNum=177) 0 -5.069053 -8.386018  
5.192522 L

|                                                    |   |            |            |
|----------------------------------------------------|---|------------|------------|
| C-CX--0.027500(PDBName=CA,ResName=TRP,ResNum=177)  | 0 | -6.840170  | -9.250485  |
| 5.955323 L                                         |   |            |            |
| H-H1-0.112300(PDBName=HA,ResName=TRP,ResNum=177)   | 0 | -7.607135  | -8.908356  |
| 6.649437 L                                         |   |            |            |
| C-CT--0.005000(PDBName=CB,ResName=TRP,ResNum=177)  | 0 | -7.524206  | -9.735999  |
| 4.663356 H                                         |   |            |            |
| H-HC-0.033900(PDBName=HB2,ResName=TRP,ResNum=177)  | 0 | -6.728779  | -10.139036 |
| 4.029472 H                                         |   |            |            |
| H-HC-0.033900(PDBName=HB3,ResName=TRP,ResNum=177)  | 0 | -8.150345  | -10.594317 |
| 4.937817 H                                         |   |            |            |
| C-C*--0.141500(PDBName=CG,ResName=TRP,ResNum=177)  | 0 | -8.360133  | -8.768242  |
| 3.878737 H                                         |   |            |            |
| C-CW--0.163800(PDBName=CD1,ResName=TRP,ResNum=177) | 0 | -7.975261  | -7.967869  |
| 2.829602 H                                         |   |            |            |
| H-H4-0.206200(PDBName=HD1,ResName=TRP,ResNum=177)  | 0 | -7.004574  | -7.870992  |
| 2.361255 H                                         |   |            |            |
| N-NA--0.341800(PDBName=NE1,ResName=TRP,ResNum=177) | 0 | -9.042855  | -7.202318  |
| 2.389040 H                                         |   |            |            |
| H-H-0.341200(PDBName=HE1,ResName=TRP,ResNum=177)   | 0 | -9.089359  | -6.694879  |
| 1.515276 H                                         |   |            |            |
| C-CN-0.138000(PDBName=CE2,ResName=TRP,ResNum=177)  | 0 | -10.154337 | -7.518700  |
| 3.143708 H                                         |   |            |            |
| C-CA--0.260100(PDBName=CZ2,ResName=TRP,ResNum=177) | 0 | -11.466538 | -7.035696  |
| 3.080924 H                                         |   |            |            |
| H-HA-0.157200(PDBName=HZ2,ResName=TRP,ResNum=177)  | 0 | -11.764532 | -6.300044  |
| 2.341410 H                                         |   |            |            |
| C-CA--0.113400(PDBName=CH2,ResName=TRP,ResNum=177) | 0 | -12.377254 | -7.531976  |
| 4.006382 H                                         |   |            |            |
| H-HA-0.141700(PDBName=HH2,ResName=TRP,ResNum=177)  | 0 | -13.385450 | -7.132666  |
| 4.018432 H                                         |   |            |            |
| C-CA--0.197200(PDBName=CZ3,ResName=TRP,ResNum=177) | 0 | -12.012779 | -8.527321  |
| 4.935419 H                                         |   |            |            |
| H-HA-0.144700(PDBName=HZ3,ResName=TRP,ResNum=177)  | 0 | -12.756248 | -8.919566  |
| 5.623509 H                                         |   |            |            |
| C-CA--0.238700(PDBName=CE3,ResName=TRP,ResNum=177) | 0 | -10.713470 | -9.013210  |
| 4.983523 H                                         |   |            |            |
| H-HA-0.170000(PDBName=HE3,ResName=TRP,ResNum=177)  | 0 | -10.439682 | -9.791873  |
| 5.689520 H                                         |   |            |            |

|                                                   |   |            |             |
|---------------------------------------------------|---|------------|-------------|
| C-CB-0.124300(PDBName=CD2,ResName=TRP,ResNum=177) | 0 | -9.755731  | -8.492719   |
| 4.099798 H                                        |   |            |             |
| C-C-0.597300(PDBName=C,ResName=TRP,ResNum=177)    | 0 | -6.070085  | -10.409867  |
| 6.614034 L                                        |   |            |             |
| O-O--0.567900(PDBName=O,ResName=TRP,ResNum=177)   | 0 | -4.866044  | -10.582647  |
| 6.401036 L                                        |   |            |             |
| N-N--0.347900(PDBName=N,ResName=ARG,ResNum=197)   | 0 | -18.563185 | -1.573145 - |
| 5.143365 L                                        |   |            |             |
| H-H-0.274700(PDBName=H,ResName=ARG,ResNum=197)    | 0 | -18.891630 | -2.435783 - |
| 4.716712 L                                        |   |            |             |
| C-CX--0.263700(PDBName=CA,ResName=ARG,ResNum=197) | 0 | -17.919933 | -1.641601 - |
| 6.470296 L                                        |   |            |             |
| H-H1-0.156000(PDBName=HA,ResName=ARG,ResNum=197)  | 0 | -16.910633 | -1.231353 - |
| 6.406554 L                                        |   |            |             |
| C-C8--0.000700(PDBName=CB,ResName=ARG,ResNum=197) | 0 | -17.837479 | -3.097198 - |
| 6.968774 L                                        |   |            |             |
| H-HC-0.032700(PDBName=HB2,ResName=ARG,ResNum=197) | 0 | -18.821140 | -3.567204 - |
| 6.917508 L                                        |   |            |             |
| H-HC-0.032700(PDBName=HB3,ResName=ARG,ResNum=197) | 0 | -17.550329 | -3.064277 - |
| 8.019997 L                                        |   |            |             |
| C-C8-0.039000(PDBName=CG,ResName=ARG,ResNum=197)  | 0 | -16.819672 | -3.963526 - |
| 6.201271 L                                        |   |            |             |
| H-HC-0.028500(PDBName=HG2,ResName=ARG,ResNum=197) | 0 | -15.945428 | -3.367080 - |
| 5.940057 L                                        |   |            |             |
| H-HC-0.028500(PDBName=HG3,ResName=ARG,ResNum=197) | 0 | -17.270489 | -4.317868 - |
| 5.276880 L                                        |   |            |             |
| C-C8-0.048600(PDBName=CD,ResName=ARG,ResNum=197)  | 0 | -16.365494 | -5.177517 - |
| 7.022373 H                                        |   |            |             |
| H-H1-0.068700(PDBName=HD2,ResName=ARG,ResNum=197) | 0 | -15.794782 | -5.838763 - |
| 6.354255 H                                        |   |            |             |
| H-H1-0.068700(PDBName=HD3,ResName=ARG,ResNum=197) | 0 | -17.260204 | -5.719582 - |
| 7.355431 H                                        |   |            |             |
| N-N2--0.529500(PDBName=NE,ResName=ARG,ResNum=197) | 0 | -15.548423 | -4.731016 - |
| 8.139744 H                                        |   |            |             |
| H-H-0.345600(PDBName=HE,ResName=ARG,ResNum=197)   | 0 | -15.230722 | -3.703156 - |
| 8.155723 H                                        |   |            |             |
| C-CA-0.807600(PDBName=CZ,ResName=ARG,ResNum=197)  | 0 | -15.017215 | -5.523878 - |
| 9.049569 H                                        |   |            |             |

N-N2--0.862700(PDBName=NH1,ResName=ARG,ResNum=197) 0 -15.335817 -6.862176 -  
 9.180885 H  
 H-H-0.447800(PDBName=HH11,ResName=ARG,ResNum=197) 0 -15.818272 -7.285936 -  
 8.370032 H  
 H-H-0.447800(PDBName=HH12,ResName=ARG,ResNum=197) 0 -14.490620 -7.430470 -  
 9.319985 H  
 N-N2--0.862700(PDBName=NH2,ResName=ARG,ResNum=197) 0 -14.228576 -4.977581 -  
 9.988575 H  
 H-H-0.447800(PDBName=HH21,ResName=ARG,ResNum=197) 0 -13.705253 -4.102408 -  
 9.770246 H  
 H-H-0.447800(PDBName=HH22,ResName=ARG,ResNum=197) 0 -13.741394 -5.649722 -  
 10.589710 H  
 C-C-0.734100(PDBName=C,ResName=ARG,ResNum=197) 0 -18.671898 -0.794140 -  
 7.494039 L  
 O-O--0.589400(PDBName=O,ResName=ARG,ResNum=197) 0 -18.049793 -0.079331 -  
 8.289551 L  
 C-CJ--0.316472(PDBName=C1,ResName=DHK,ResNum=225) 0 -11.354738 -1.857007  
 0.290208 H  
 H-HK-0.158183(PDBName=H2,ResName=DHK,ResNum=225) 0 -11.596250 -0.801936  
 0.370945 H  
 C-CJ--0.090287(PDBName=C3,ResName=DHK,ResNum=225) 0 -11.000466 -2.602278  
 1.412610 H  
 H-HK-0.142318(PDBName=H4,ResName=DHK,ResNum=225) 0 -11.027280 -2.141191  
 2.392030 H  
 C-CJ--0.390043(PDBName=C5,ResName=DHK,ResNum=225) 0 -10.604327 -3.934114  
 1.295615 H  
 H-HK-0.190546(PDBName=H6,ResName=DHK,ResNum=225) 0 -10.289077 -4.504383  
 2.162343 H  
 C-CJ-0.446965(PDBName=C7,ResName=DHK,ResNum=225) 0 -10.588539 -4.556605  
 0.036967 H  
 O-OX--0.642443(PDBName=O8,ResName=DHK,ResNum=225) 0 -10.157333 -5.830822 -  
 0.042692 H  
 H-HY-0.433577(PDBName=H9,ResName=DHK,ResNum=225) 0 -10.206145 -6.091004 -  
 1.004042 H  
 C-CJ--0.168157(PDBName=C10,ResName=DHK,ResNum=225) 0 -11.016719 -3.843702 -  
 1.105191 H  
 C-CJ-0.254614(PDBName=C11,ResName=DHK,ResNum=225) 0 -11.015531 -4.457754 -  
 2.429929 H

O-OX--0.544517(PDBName=O12,ResName=DHK,ResNum=225) 0 -10.543642 -5.626709 -  
2.587454 H

H-HY-0.383602(PDBName=H13,ResName=DHK,ResNum=225) 0 -9.027594 -5.248556 -  
3.586670 H

C-CJ-0.213075(PDBName=C14,ResName=DHK,ResNum=225) 0 -11.372476 -2.477383 -  
0.969921 H

C-CJ--0.377966(PDBName=C15,ResName=DHK,ResNum=225) 0 -11.647217 -1.742691 -  
2.156597 H

H-HK-0.179148(PDBName=H16,ResName=DHK,ResNum=225) 0 -11.847415 -0.680905 -  
2.065049 H

C-CJ-0.165502(PDBName=C17,ResName=DHK,ResNum=225) 0 -11.820132 -2.375605 -  
3.416645 H

C-CZ--0.111477(PDBName=C18,ResName=DHK,ResNum=225) 0 -12.246236 -1.530362 -  
4.581616 H

H-H8-0.032583(PDBName=H19,ResName=DHK,ResNum=225) 0 -13.092288 -0.896634 -  
4.289548 H

H-H8-0.032583(PDBName=H20,ResName=DHK,ResNum=225) 0 -11.426084 -0.842919 -  
4.822341 H

C-CJ--0.377452(PDBName=C21,ResName=DHK,ResNum=225) 0 -11.524003 -3.708510 -  
3.570303 H

C-CZ-0.692240(PDBName=C22,ResName=DHK,ResNum=225) 0 -11.640904 -4.388792 -  
4.920392 H

C-CZ--0.555194(PDBName=C23,ResName=DHK,ResNum=225) 0 -12.809963 -5.379315 -  
4.962970 H

H-H8-0.129933(PDBName=H24,ResName=DHK,ResNum=225) 0 -12.654390 -6.174976 -  
4.226188 H

H-H8-0.129933(PDBName=H25,ResName=DHK,ResNum=225) 0 -12.870338 -5.845075 -  
5.952762 H

H-H8-0.129933(PDBName=H26,ResName=DHK,ResNum=225) 0 -13.767367 -4.896814 -  
4.746909 H

H-H9--0.039392(PDBName=H27,ResName=DHK,ResNum=225) 0 -10.712077 -4.934696 -  
5.105831 H

O-OI--0.712638(PDBName=O28,ResName=DHK,ResNum=225) 0 -11.715099 -3.449786 -  
6.004030 H

C-CZ-0.665570(PDBName=C29,ResName=DHK,ResNum=225) 0 -12.635810 -2.365706 -  
5.797096 H

H-H9--0.064844(PDBName=H30,ResName=DHK,ResNum=225) 0 -13.652088 -2.759605 -  
5.651465 H



C-CZ--0.289485(PDBName=C31,ResName=DHK,ResNum=225) 0 -12.627034 -1.536811 -  
 7.084742 H  
 H-H8-0.039536(PDBName=H32,ResName=DHK,ResNum=225) 0 -11.586860 -1.359024 -  
 7.368542 H  
 H-H8-0.039536(PDBName=H33,ResName=DHK,ResNum=225) 0 -13.124668 -0.581509 -  
 6.886158 H  
 C-CV-0.810685(PDBName=C34,ResName=DHK,ResNum=225) 0 -13.388446 -2.273349 -  
 8.181788 H  
 O-O5--0.794847(PDBName=O35,ResName=DHK,ResNum=225) 0 -12.733201 -2.828263 -  
 9.100484 H  
 O-O5--0.794847(PDBName=O36,ResName=DHK,ResNum=225) 0 -14.657328 -2.294276 -  
 8.048532 H  
 O-O5--0.000000(PDBName=O1,ResName=OXY,ResNum=226) 0 -8.683351 -2.477542 -  
 2.282351 H  
 O-O5--0.000000(PDBName=O2,ResName=OXY,ResNum=226) 0 -9.414615 -1.421595 -  
 2.715382 H  
 O-OW--0.834000(PDBName=O,ResName=WAT,ResNum=425) 0 -10.467665 0.892668 -  
 1.590846 H  
 H-HW-0.417000(PDBName=H1,ResName=WAT,ResNum=425) 0 -9.884598 0.115497 -  
 1.623623 H  
 H-HW-0.417000(PDBName=H2,ResName=WAT,ResNum=425) 0 -10.372319 1.229614 -  
 0.685316 H  
 O-OW--0.834000(PDBName=O,ResName=WAT,ResNum=639) 0 -8.467953 -4.562367 -  
 4.000270 H  
 H-HW-0.417000(PDBName=H1,ResName=WAT,ResNum=639) 0 -8.606769 -3.120946 -  
 3.044276 H  
 H-HW-0.417000(PDBName=H2,ResName=WAT,ResNum=639) 0 -7.616102 -4.974830 -  
 4.200898 H

**<sup>1</sup>M2 (L4)**

0 1

N-N--0.415700(PDBName=N,ResName=ASN,ResNum=173) 0 -5.790989 3.042514 -  
 2.282342 L  
 H-H-0.271900(PDBName=H,ResName=ASN,ResNum=173) 0 -5.968702 2.598886 -  
 3.178789 L  
 C-CX-0.014300(PDBName=CA,ResName=ASN,ResNum=173) 0 -6.161775 2.318340 -  
 1.055269 L  
 H-H1-0.104800(PDBName=HA,ResName=ASN,ResNum=173) 0 -6.110510 3.005642 -

0.212492 L  
C-2C--0.204100(PDBName=CB,ResName=ASN,ResNum=173) 0 -7.614391 1.811765 -  
1.138071 H  
H-HC-0.079700(PDBName=HB2,ResName=ASN,ResNum=173) 0 -8.257695 2.641838 -  
1.449055 H  
H-HC-0.079700(PDBName=HB3,ResName=ASN,ResNum=173) 0 -7.702380 1.041938 -  
1.912369 H  
C-C-0.713000(PDBName=CG,ResName=ASN,ResNum=173) 0 -8.127843 1.268475  
0.198620 H  
O-O--0.593100(PDBName=OD1,ResName=ASN,ResNum=173) 0 -7.543015 1.351650  
1.261674 H  
N-N--0.919100(PDBName=ND2,ResName=ASN,ResNum=173) 0 -9.327856 0.571199  
0.112751 H  
H-H-0.419600(PDBName=HD21,ResName=ASN,ResNum=173) 0 -9.741282 0.369562  
1.015056 H  
H-H-0.419600(PDBName=HD22,ResName=ASN,ResNum=173) 0 -10.009634 0.828290 -  
0.593880 H  
C-C-0.597300(PDBName=C,ResName=ASN,ResNum=173) 0 -5.162454 1.181765 -  
0.780706 L  
O-O--0.567900(PDBName=O,ResName=ASN,ResNum=173) 0 -4.816321 0.454222 -  
1.710058 L  
N-N--0.415700(PDBName=N,ResName=TRP,ResNum=177) 0 -5.945391 -8.126106  
5.635612 L  
H-H-0.271900(PDBName=H,ResName=TRP,ResNum=177) 0 -5.059591 -8.377447  
5.205416 L  
C-CX--0.027500(PDBName=CA,ResName=TRP,ResNum=177) 0 -6.831395 -9.243522  
5.966289 L  
H-H1-0.112300(PDBName=HA,ResName=TRP,ResNum=177) 0 -7.595689 -8.903777  
6.664366 L  
C-CT--0.005000(PDBName=CB,ResName=TRP,ResNum=177) 0 -7.520385 -9.712765  
4.670519 H  
H-HC-0.033900(PDBName=HB2,ResName=TRP,ResNum=177) 0 -6.729518 -10.123716  
4.036092 H  
H-HC-0.033900(PDBName=HB3,ResName=TRP,ResNum=177) 0 -8.159229 -10.563541  
4.938894 H  
C-C\*--0.141500(PDBName=CG,ResName=TRP,ResNum=177) 0 -8.338503 -8.725506  
3.889589 H  
C-CW--0.163800(PDBName=CD1,ResName=TRP,ResNum=177) 0 -7.929804 -7.909360

|                                                    |   |            |             |
|----------------------------------------------------|---|------------|-------------|
| 2.860633 H                                         |   |            |             |
| H-H4-0.206200(PDBName=HD1,ResName=TRP,ResNum=177)  | 0 | -6.951250  | -7.814102   |
| 2.408568 H                                         |   |            |             |
| N-NA--0.341800(PDBName=NE1,ResName=TRP,ResNum=177) | 0 | -8.983940  | -7.130370   |
| 2.415130 H                                         |   |            |             |
| H-H-0.341200(PDBName=HE1,ResName=TRP,ResNum=177)   | 0 | -8.989483  | -6.546336   |
| 1.589218 H                                         |   |            |             |
| C-CN-0.138000(PDBName=CE2,ResName=TRP,ResNum=177)  | 0 | -10.107869 | -7.443824   |
| 3.149013 H                                         |   |            |             |
| C-CA--0.260100(PDBName=CZ2,ResName=TRP,ResNum=177) | 0 | -11.415479 | -6.950390   |
| 3.070752 H                                         |   |            |             |
| H-HA-0.157200(PDBName=HZ2,ResName=TRP,ResNum=177)  | 0 | -11.695113 | -6.200231   |
| 2.338409 H                                         |   |            |             |
| C-CA--0.113400(PDBName=CH2,ResName=TRP,ResNum=177) | 0 | -12.348159 | -7.458339   |
| 3.967579 H                                         |   |            |             |
| H-HA-0.141700(PDBName=HH2,ResName=TRP,ResNum=177)  | 0 | -13.356110 | -7.057181   |
| 3.961683 H                                         |   |            |             |
| C-CA--0.197200(PDBName=CZ3,ResName=TRP,ResNum=177) | 0 | -12.007008 | -8.470125   |
| 4.888111 H                                         |   |            |             |
| H-HA-0.144700(PDBName=HZ3,ResName=TRP,ResNum=177)  | 0 | -12.766067 | -8.868459   |
| 5.555453 H                                         |   |            |             |
| C-CA--0.238700(PDBName=CE3,ResName=TRP,ResNum=177) | 0 | -10.711654 | -8.965176   |
| 4.953406 H                                         |   |            |             |
| H-HA-0.170000(PDBName=HE3,ResName=TRP,ResNum=177)  | 0 | -10.455816 | -9.754644   |
| 5.654840 H                                         |   |            |             |
| C-CB-0.124300(PDBName=CD2,ResName=TRP,ResNum=177)  | 0 | -9.733848  | -8.439210   |
| 4.094650 H                                         |   |            |             |
| C-C-0.597300(PDBName=C,ResName=TRP,ResNum=177)     | 0 | -6.064623  | -10.411129  |
| 6.615977 L                                         |   |            |             |
| O-O--0.567900(PDBName=O,ResName=TRP,ResNum=177)    | 0 | -4.860793  | -10.584889  |
| 6.403168 L                                         |   |            |             |
| N-N--0.347900(PDBName=N,ResName=ARG,ResNum=197)    | 0 | -18.548225 | -1.573575 - |
| 5.126728 L                                         |   |            |             |
| H-H-0.274700(PDBName=H,ResName=ARG,ResNum=197)     | 0 | -18.889254 | -2.436021 - |
| 4.709780 L                                         |   |            |             |
| C-CX--0.263700(PDBName=CA,ResName=ARG,ResNum=197)  | 0 | -17.908564 | -1.639263 - |
| 6.455454 L                                         |   |            |             |
| H-H1-0.156000(PDBName=HA,ResName=ARG,ResNum=197)   | 0 | -16.896748 | -1.234761 - |

6.394177 L  
C-C8--0.000700(PDBName=CB,ResName=ARG,ResNum=197) 0 -17.835583 -3.093891 -  
6.958235 L  
H-HC-0.032700(PDBName=HB2,ResName=ARG,ResNum=197) 0 -18.822535 -3.557160 -  
6.909192 L  
H-HC-0.032700(PDBName=HB3,ResName=ARG,ResNum=197) 0 -17.548697 -3.059352 -  
8.009430 L  
C-C8-0.039000(PDBName=CG,ResName=ARG,ResNum=197) 0 -16.825193 -3.972063 -  
6.194362 L  
H-HC-0.028500(PDBName=HG2,ResName=ARG,ResNum=197) 0 -15.946980 -3.384217 -  
5.925807 L  
H-HC-0.028500(PDBName=HG3,ResName=ARG,ResNum=197) 0 -17.281105 -4.331270 -  
5.274365 L  
C-C8-0.048600(PDBName=CD,ResName=ARG,ResNum=197) 0 -16.378948 -5.181945 -  
7.025869 H  
H-H1-0.068700(PDBName=HD2,ResName=ARG,ResNum=197) 0 -15.816651 -5.855435 -  
6.362655 H  
H-H1-0.068700(PDBName=HD3,ResName=ARG,ResNum=197) 0 -17.277451 -5.713784 -  
7.365969 H  
N-N2--0.529500(PDBName=NE,ResName=ARG,ResNum=197) 0 -15.555211 -4.731131 -  
8.135849 H  
H-H-0.345600(PDBName=HE,ResName=ARG,ResNum=197) 0 -15.230257 -3.697927 -  
8.142476 H  
C-CA-0.807600(PDBName=CZ,ResName=ARG,ResNum=197) 0 -15.023366 -5.519803 -  
9.047165 H  
N-N2--0.862700(PDBName=NH1,ResName=ARG,ResNum=197) 0 -15.354505 -6.853303 -  
9.199590 H  
H-H-0.447800(PDBName=HH11,ResName=ARG,ResNum=197) 0 -15.847010 -7.281632 -  
8.397104 H  
H-H-0.447800(PDBName=HH12,ResName=ARG,ResNum=197) 0 -14.512162 -7.427311 -  
9.337386 H  
N-N2--0.862700(PDBName=NH2,ResName=ARG,ResNum=197) 0 -14.219095 -4.967535 -  
9.971480 H  
H-H-0.447800(PDBName=HH21,ResName=ARG,ResNum=197) 0 -13.675920 -4.116957 -  
9.714449 H  
H-H-0.447800(PDBName=HH22,ResName=ARG,ResNum=197) 0 -13.730777 -5.636602 -  
10.575316 H  
C-C-0.734100(PDBName=C,ResName=ARG,ResNum=197) 0 -18.660666 -0.787789 -

7.476338 L  
O-O--0.589400(PDBName=O,ResName=ARG,ResNum=197) 0 -18.039824 -0.062713 -  
8.263846 L  
C-CJ--0.316472(PDBName=C1,ResName=DHK,ResNum=225) 0 -11.668061 -1.745113  
0.425866 H  
H-HK-0.158183(PDBName=H2,ResName=DHK,ResNum=225) 0 -12.135232 -0.772199  
0.538449 H  
C-CJ--0.090287(PDBName=C3,ResName=DHK,ResNum=225) 0 -11.303713 -2.499965  
1.548424 H  
H-HK-0.142318(PDBName=H4,ResName=DHK,ResNum=225) 0 -11.506218 -2.118827  
2.544791 H  
C-CJ--0.390043(PDBName=C5,ResName=DHK,ResNum=225) 0 -10.681482 -3.732836  
1.406804 H  
H-HK-0.190546(PDBName=H6,ResName=DHK,ResNum=225) 0 -10.375726 -4.314519  
2.268970 H  
C-CJ-0.446965(PDBName=C7,ResName=DHK,ResNum=225) 0 -10.440558 -4.248181  
0.124154 H  
O-OX--0.642443(PDBName=O8,ResName=DHK,ResNum=225) 0 -9.843929 -5.452492  
0.020794 H  
H-HY-0.433577(PDBName=H9,ResName=DHK,ResNum=225) 0 -9.746825 -5.641340 -  
0.951771 H  
C-CJ--0.168157(PDBName=C10,ResName=DHK,ResNum=225) 0 -10.830837 -3.506158 -  
1.019299 H  
C-CJ-0.254614(PDBName=C11,ResName=DHK,ResNum=225) 0 -10.646780 -4.062236 -  
2.372892 H  
O-OX--0.544517(PDBName=O12,ResName=DHK,ResNum=225) 0 -10.008383 -5.127501 -  
2.529572 H  
H-HY-0.383602(PDBName=H13,ResName=DHK,ResNum=225) 0 -8.176355 -4.932191 -  
3.810262 H  
C-CJ-0.213075(PDBName=C14,ResName=DHK,ResNum=225) 0 -11.426651 -2.242950 -  
0.849059 H  
C-CJ--0.377966(PDBName=C15,ResName=DHK,ResNum=225) 0 -11.691803 -1.394710 -  
2.066598 H  
H-HK-0.179148(PDBName=H16,ResName=DHK,ResNum=225) 0 -12.586376 -0.783877 -  
1.906026 H  
C-CJ-0.165502(PDBName=C17,ResName=DHK,ResNum=225) 0 -11.773378 -2.139013 -  
3.367481 H  
C-CZ--0.111477(PDBName=C18,ResName=DHK,ResNum=225) 0 -12.325041 -1.373854 -

4.530265 H  
 H-H8-0.032583(PDBName=H19,ResName=DHK,ResNum=225) 0 -13.249617 -0.860953 -  
 4.235729 H  
 H-H8-0.032583(PDBName=H20,ResName=DHK,ResNum=225) 0 -11.609251 -0.581393 -  
 4.784372 H  
 C-CJ--0.377452(PDBName=C21,ResName=DHK,ResNum=225) 0 -11.265430 -3.378566 -  
 3.521354 H  
 C-CZ-0.692240(PDBName=C22,ResName=DHK,ResNum=225) 0 -11.266249 -4.085216 -  
 4.866154 H  
 C-CZ--0.555194(PDBName=C23,ResName=DHK,ResNum=225) 0 -12.247906 -5.259426 -  
 4.886907 H  
 H-H8-0.129933(PDBName=H24,ResName=DHK,ResNum=225) 0 -11.989586 -5.983611 -  
 4.107864 H  
 H-H8-0.129933(PDBName=H25,ResName=DHK,ResNum=225) 0 -12.205367 -5.776803 -  
 5.849662 H  
 H-H8-0.129933(PDBName=H26,ResName=DHK,ResNum=225) 0 -13.278919 -4.933162 -  
 4.714711 H  
 H-H9--0.039392(PDBName=H27,ResName=DHK,ResNum=225) 0 -10.252995 -4.452653 -  
 5.051661 H  
 O-OI--0.712638(PDBName=O28,ResName=DHK,ResNum=225) 0 -11.523766 -3.187754 -  
 5.956958 H  
 C-CZ-0.665570(PDBName=C29,ResName=DHK,ResNum=225) 0 -12.593257 -2.263165 -  
 5.743358 H  
 H-H9--0.064844(PDBName=H30,ResName=DHK,ResNum=225) 0 -13.539717 -2.802497 -  
 5.582650 H  
 C-CZ--0.289485(PDBName=C31,ResName=DHK,ResNum=225) 0 -12.716263 -1.438553 -  
 7.030411 H  
 H-H8-0.039536(PDBName=H32,ResName=DHK,ResNum=225) 0 -11.707869 -1.148770 -  
 7.334189 H  
 H-H8-0.039536(PDBName=H33,ResName=DHK,ResNum=225) 0 -13.314110 -0.545314 -  
 6.821622 H  
 C-CV-0.810685(PDBName=C34,ResName=DHK,ResNum=225) 0 -13.414540 -2.256703 -  
 8.110517 H  
 O-O5--0.794847(PDBName=O35,ResName=DHK,ResNum=225) 0 -12.714132 -2.846309 -  
 8.970881 H  
 O-O5--0.794847(PDBName=O36,ResName=DHK,ResNum=225) 0 -14.688641 -2.300720 -  
 8.021222 H  
 O-O5--0.000000(PDBName=O1,ResName=OXY,ResNum=226) 0 -9.367932 -0.978280 -

2.201579 H  
O-O5--0.000000(PDBName=O2,ResName=OXY,ResNum=226) 0 -10.676025 -0.350629 -  
2.196278 H  
O-OW--0.834000(PDBName=O,ResName=WAT,ResNum=425) 0 -13.762369 0.657107 -  
0.751665 H  
H-HW-0.417000(PDBName=H1,ResName=WAT,ResNum=425) 0 -13.228084 1.260548 -  
0.195784 H  
H-HW-0.417000(PDBName=H2,ResName=WAT,ResNum=425) 0 -14.204526 0.113310 -  
0.086350 H  
O-OW--0.834000(PDBName=O,ResName=WAT,ResNum=639) 0 -7.938555 -4.649242 -  
4.702581 H  
H-HW-0.417000(PDBName=H1,ResName=WAT,ResNum=639) 0 -9.125553 -0.850730 -  
1.255776 H  
H-HW-0.417000(PDBName=H2,ResName=WAT,ResNum=639) 0 -7.136369 -4.109166 -  
4.603052 H

**1TS3 (L4)**  
0 1  
N-N--0.415700(PDBName=N,ResName=ASN,ResNum=173) 0 -5.730069 2.996981 -  
2.315334 L  
H-H-0.271900(PDBName=H,ResName=ASN,ResNum=173) 0 -5.898887 2.605598 -  
3.237137 L  
C-CX-0.014300(PDBName=CA,ResName=ASN,ResNum=173) 0 -6.052990 2.143991 -  
1.163789 L  
H-H1-0.104800(PDBName=HA,ResName=ASN,ResNum=173) 0 -6.308309 2.760487 -  
0.300703 L  
C-2C--0.204100(PDBName=CB,ResName=ASN,ResNum=173) 0 -7.264128 1.260424 -  
1.527981 H  
H-HC-0.079700(PDBName=HB2,ResName=ASN,ResNum=173) 0 -8.128308 1.907804 -  
1.675395 H  
H-HC-0.079700(PDBName=HB3,ResName=ASN,ResNum=173) 0 -7.049684 0.749473 -  
2.470618 H  
C-C-0.713000(PDBName=CG,ResName=ASN,ResNum=173) 0 -7.618720 0.257831 -  
0.423618 H  
O-O--0.593100(PDBName=OD1,ResName=ASN,ResNum=173) 0 -8.206104 0.587079  
0.595669 H  
N-N--0.919100(PDBName=ND2,ResName=ASN,ResNum=173) 0 -7.251764 -1.037568 -  
0.672126 H

|                                                    |   |            |             |
|----------------------------------------------------|---|------------|-------------|
| H-H-0.419600(PDBName=HD21,ResName=ASN,ResNum=173)  | 0 | -7.390162  | -1.704717   |
| 0.075845 H                                         |   |            |             |
| H-H-0.419600(PDBName=HD22,ResName=ASN,ResNum=173)  | 0 | -6.534550  | -1.275137 - |
| 1.341992 H                                         |   |            |             |
| C-C-0.597300(PDBName=C,ResName=ASN,ResNum=173)     | 0 | -4.871977  | 1.228776 -  |
| 0.795154 L                                         |   |            |             |
| O-O--0.567900(PDBName=O,ResName=ASN,ResNum=173)    | 0 | -4.326957  | 0.574897 -  |
| 1.683455 L                                         |   |            |             |
| N-N--0.415700(PDBName=N,ResName=TRP,ResNum=177)    | 0 | -5.944140  | -8.126862   |
| 5.630936 L                                         |   |            |             |
| H-H-0.271900(PDBName=H,ResName=TRP,ResNum=177)     | 0 | -5.059946  | -8.384815   |
| 5.201556 L                                         |   |            |             |
| C-CX--0.027500(PDBName=CA,ResName=TRP,ResNum=177)  | 0 | -6.836218  | -9.239614   |
| 5.962270 L                                         |   |            |             |
| H-H1-0.112300(PDBName=HA,ResName=TRP,ResNum=177)   | 0 | -7.597708  | -8.895423   |
| 6.661244 L                                         |   |            |             |
| C-CT--0.005000(PDBName=CB,ResName=TRP,ResNum=177)  | 0 | -7.529142  | -9.702851   |
| 4.664656 H                                         |   |            |             |
| H-HC-0.033900(PDBName=HB2,ResName=TRP,ResNum=177)  | 0 | -6.747971  | -10.166241  |
| 4.054156 H                                         |   |            |             |
| H-HC-0.033900(PDBName=HB3,ResName=TRP,ResNum=177)  | 0 | -8.209471  | -10.517680  |
| 4.943313 H                                         |   |            |             |
| C-C*-0.141500(PDBName=CG,ResName=TRP,ResNum=177)   | 0 | -8.290057  | -8.707166   |
| 3.832540 H                                         |   |            |             |
| C-CW--0.163800(PDBName=CD1,ResName=TRP,ResNum=177) | 0 | -7.828361  | -7.971698   |
| 2.765428 H                                         |   |            |             |
| H-H4-0.206200(PDBName=HD1,ResName=TRP,ResNum=177)  | 0 | -6.838925  | -7.946571   |
| 2.327921 H                                         |   |            |             |
| N-NA--0.341800(PDBName=NE1,ResName=TRP,ResNum=177) | 0 | -8.836478  | -7.170012   |
| 2.254084 H                                         |   |            |             |
| H-H-0.341200(PDBName=HE1,ResName=TRP,ResNum=177)   | 0 | -8.832893  | -6.718152   |
| 1.347934 H                                         |   |            |             |
| C-CN-0.138000(PDBName=CE2,ResName=TRP,ResNum=177)  | 0 | -9.988816  | -7.400377   |
| 2.978284 H                                         |   |            |             |
| C-CA--0.260100(PDBName=CZ2,ResName=TRP,ResNum=177) | 0 | -11.270558 | -6.860814   |
| 2.828909 H                                         |   |            |             |
| H-HA-0.157200(PDBName=HZ2,ResName=TRP,ResNum=177)  | 0 | -11.485208 | -6.136906   |
| 2.049055 H                                         |   |            |             |



|                                                    |   |            |             |
|----------------------------------------------------|---|------------|-------------|
| C-CA--0.113400(PDBName=CH2,ResName=TRP,ResNum=177) | 0 | -12.250949 | -7.288265   |
| 3.716663 H                                         |   |            |             |
| H-HA-0.141700(PDBName=HH2,ResName=TRP,ResNum=177)  | 0 | -13.247333 | -6.863471   |
| 3.647105 H                                         |   |            |             |
| C-CA--0.197200(PDBName=CZ3,ResName=TRP,ResNum=177) | 0 | -11.973876 | -8.252710   |
| 4.708125 H                                         |   |            |             |
| H-HA-0.144700(PDBName=HZ3,ResName=TRP,ResNum=177)  | 0 | -12.769693 | -8.585208   |
| 5.368866 H                                         |   |            |             |
| C-CA--0.238700(PDBName=CE3,ResName=TRP,ResNum=177) | 0 | -10.698525 | -8.784107   |
| 4.851525 H                                         |   |            |             |
| H-HA-0.170000(PDBName=HE3,ResName=TRP,ResNum=177)  | 0 | -10.492405 | -9.534524   |
| 5.610798 H                                         |   |            |             |
| C-CB-0.124300(PDBName=CD2,ResName=TRP,ResNum=177)  | 0 | -9.677337  | -8.350082   |
| 3.990497 H                                         |   |            |             |
| C-C-0.597300(PDBName=C,ResName=TRP,ResNum=177)     | 0 | -6.069263  | -10.411794  |
| 6.612221 L                                         |   |            |             |
| O-O--0.567900(PDBName=O,ResName=TRP,ResNum=177)    | 0 | -4.865969  | -10.585861  |
| 6.395989 L                                         |   |            |             |
| N-N--0.347900(PDBName=N,ResName=ARG,ResNum=197)    | 0 | -18.551508 | -1.581964 - |
| 5.130253 L                                         |   |            |             |
| H-H-0.274700(PDBName=H,ResName=ARG,ResNum=197)     | 0 | -18.890064 | -2.443614 - |
| 4.709299 L                                         |   |            |             |
| C-CX--0.263700(PDBName=CA,ResName=ARG,ResNum=197)  | 0 | -17.912916 | -1.650656 - |
| 6.460012 L                                         |   |            |             |
| H-H1-0.156000(PDBName=HA,ResName=ARG,ResNum=197)   | 0 | -16.901485 | -1.245542 - |
| 6.399912 L                                         |   |            |             |
| C-C8--0.000700(PDBName=CB,ResName=ARG,ResNum=197)  | 0 | -17.837723 | -3.106141 - |
| 6.961830 L                                         |   |            |             |
| H-HC-0.032700(PDBName=HB2,ResName=ARG,ResNum=197)  | 0 | -18.822691 | -3.572839 - |
| 6.906238 L                                         |   |            |             |
| H-HC-0.032700(PDBName=HB3,ResName=ARG,ResNum=197)  | 0 | -17.556738 | -3.071674 - |
| 8.014713 L                                         |   |            |             |
| C-C8-0.039000(PDBName=CG,ResName=ARG,ResNum=197)   | 0 | -16.818712 | -3.979894 - |
| 6.203804 L                                         |   |            |             |
| H-HC-0.028500(PDBName=HG2,ResName=ARG,ResNum=197)  | 0 | -15.937630 | -3.389378 - |
| 5.951513 L                                         |   |            |             |
| H-HC-0.028500(PDBName=HG3,ResName=ARG,ResNum=197)  | 0 | -17.263918 | -4.329902 - |
| 5.274594 L                                         |   |            |             |

C-C8-0.048600(PDBName=CD,ResName=ARG,ResNum=197) 0 -16.379618 -5.197849 -  
 7.028805 H  
 H-H1-0.068700(PDBName=HD2,ResName=ARG,ResNum=197) 0 -15.805074 -5.860331 -  
 6.365738 H  
 H-H1-0.068700(PDBName=HD3,ResName=ARG,ResNum=197) 0 -17.280396 -5.736039 -  
 7.352339 H  
 N-N2--0.529500(PDBName=NE,ResName=ARG,ResNum=197) 0 -15.571237 -4.756727 -  
 8.154854 H  
 H-H-0.345600(PDBName=HE,ResName=ARG,ResNum=197) 0 -15.265130 -3.725668 -  
 8.185947 H  
 C-CA-0.807600(PDBName=CZ,ResName=ARG,ResNum=197) 0 -15.028817 -5.551951 -  
 9.055690 H  
 N-N2--0.862700(PDBName=NH1,ResName=ARG,ResNum=197) 0 -15.330950 -6.894406 -  
 9.177331 H  
 H-H-0.447800(PDBName=HH11,ResName=ARG,ResNum=197) 0 -15.820214 -7.316686 -  
 8.370017 H  
 H-H-0.447800(PDBName=HH12,ResName=ARG,ResNum=197) 0 -14.479925 -7.455374 -  
 9.306580 H  
 N-N2--0.862700(PDBName=NH2,ResName=ARG,ResNum=197) 0 -14.244336 -5.005512 -  
 9.998374 H  
 H-H-0.447800(PDBName=HH21,ResName=ARG,ResNum=197) 0 -13.732174 -4.119967 -  
 9.792300 H  
 H-H-0.447800(PDBName=HH22,ResName=ARG,ResNum=197) 0 -13.746935 -5.679014 -  
 10.589847 H  
 C-C-0.734100(PDBName=C,ResName=ARG,ResNum=197) 0 -18.666212 -0.799517 -  
 7.480570 L  
 O-O--0.589400(PDBName=O,ResName=ARG,ResNum=197) 0 -18.046148 -0.076958 -  
 8.271150 L  
 C-CJ--0.316472(PDBName=C1,ResName=DHK,ResNum=225) 0 -10.615019 -1.659681  
 0.020743 H  
 H-HK-0.158183(PDBName=H2,ResName=DHK,ResNum=225) 0 -10.751146 -0.589255  
 0.116919 H  
 C-CJ--0.090287(PDBName=C3,ResName=DHK,ResNum=225) 0 -10.173988 -2.430649  
 1.091682 H  
 H-HK-0.142318(PDBName=H4,ResName=DHK,ResNum=225) 0 -9.992625 -1.951182  
 2.041563 H  
 C-CJ--0.390043(PDBName=C5,ResName=DHK,ResNum=225) 0 -9.947859 -3.801460  
 0.970489 H

H-HK-0.190546(PDBName=H6,ResName=DHK,ResNum=225) 0 -9.611627 -4.398408  
1.811531 H  
C-CJ-0.446965(PDBName=C7,ResName=DHK,ResNum=225) 0 -10.139385 -4.425546 -  
0.262492 H  
O-OX--0.642443(PDBName=O8,ResName=DHK,ResNum=225) 0 -9.870624 -5.743827 -  
0.365677 H  
H-HY-0.433577(PDBName=H9,ResName=DHK,ResNum=225) 0 -10.061877 -5.998401 -  
1.314995 H  
C-CJ--0.168157(PDBName=C10,ResName=DHK,ResNum=225) 0 -10.626378 -3.670870 -  
1.366121 H  
C-CJ-0.254614(PDBName=C11,ResName=DHK,ResNum=225) 0 -10.852513 -4.320584 -  
2.658603 H  
O-OX--0.544517(PDBName=O12,ResName=DHK,ResNum=225) 0 -10.560969 -5.531262 -  
2.825104 H  
H-HY-0.383602(PDBName=H13,ResName=DHK,ResNum=225) 0 -12.481877 1.470380 -  
2.112137 H  
C-CJ-0.213075(PDBName=C14,ResName=DHK,ResNum=225) 0 -10.852581 -2.283987 -  
1.204874 H  
C-CJ--0.377966(PDBName=C15,ResName=DHK,ResNum=225) 0 -11.472698 -1.539690 -  
2.321875 H  
H-HK-0.179148(PDBName=H16,ResName=DHK,ResNum=225) 0 -12.747775 -1.687230 -  
1.922007 H  
C-CJ-0.165502(PDBName=C17,ResName=DHK,ResNum=225) 0 -11.672197 -2.213420 -  
3.608911 H  
C-CZ--0.111477(PDBName=C18,ResName=DHK,ResNum=225) 0 -12.160989 -1.386761 -  
4.756203 H  
H-H8-0.032583(PDBName=H19,ResName=DHK,ResNum=225) 0 -12.952413 -0.706109 -  
4.421691 H  
H-H8-0.032583(PDBName=H20,ResName=DHK,ResNum=225) 0 -11.334677 -0.748514 -  
5.082447 H  
C-CJ--0.377452(PDBName=C21,ResName=DHK,ResNum=225) 0 -11.420623 -3.544138 -  
3.753676 H  
C-CZ-0.692240(PDBName=C22,ResName=DHK,ResNum=225) 0 -11.638224 -4.254096 -  
5.076965 H  
C-CZ--0.555194(PDBName=C23,ResName=DHK,ResNum=225) 0 -12.826471 -5.219804 -  
5.036463 H  
H-H8-0.129933(PDBName=H24,ResName=DHK,ResNum=225) 0 -12.631884 -6.011378 -  
4.305297 H

H-H8-0.129933(PDBName=H25,ResName=DHK,ResNum=225) 0 -12.963416 -5.690073 -  
6.017289 H  
H-H8-0.129933(PDBName=H26,ResName=DHK,ResNum=225) 0 -13.757943 -4.717751 -  
4.758539 H  
H-H9--0.039392(PDBName=H27,ResName=DHK,ResNum=225) 0 -10.737023 -4.834333 -  
5.299954 H  
O-OI--0.712638(PDBName=O28,ResName=DHK,ResNum=225) 0 -11.753732 -3.332197 -  
6.172718 H  
C-CZ-0.665570(PDBName=C29,ResName=DHK,ResNum=225) 0 -12.649986 -2.240207 -  
5.920155 H  
H-H9--0.064844(PDBName=H30,ResName=DHK,ResNum=225) 0 -13.658732 -2.617589 -  
5.699964 H  
C-CZ--0.289485(PDBName=C31,ResName=DHK,ResNum=225) 0 -12.708464 -1.437784 -  
7.219420 H  
H-H8-0.039536(PDBName=H32,ResName=DHK,ResNum=225) 0 -11.681531 -1.231043 -  
7.526834 H  
H-H8-0.039536(PDBName=H33,ResName=DHK,ResNum=225) 0 -13.241335 -0.499087 -  
7.033264 H  
C-CV-0.810685(PDBName=C34,ResName=DHK,ResNum=225) 0 -13.453673 -2.243266 -  
8.275082 H  
O-O5--0.794847(PDBName=O35,ResName=DHK,ResNum=225) 0 -12.790110 -2.807482 -  
9.181890 H  
O-O5--0.794847(PDBName=O36,ResName=DHK,ResNum=225) 0 -14.716954 -2.310712 -  
8.114340 H  
O-O5--0.000000(PDBName=O1,ResName=OXY,ResNum=226) 0 -12.530685 0.644476 -  
1.579049 H  
O-O5--0.000000(PDBName=O2,ResName=OXY,ResNum=226) 0 -11.277647 -0.205431 -  
2.365812 H  
O-OW--0.834000(PDBName=O,ResName=WAT,ResNum=425) 0 -12.213340 3.166481 -  
2.692199 H  
H-HW-0.417000(PDBName=H1,ResName=WAT,ResNum=425) 0 -11.562229 3.331059 -  
3.389674 H  
H-HW-0.417000(PDBName=H2,ResName=WAT,ResNum=425) 0 -11.867027 3.625709 -  
1.912810 H  
O-OW--0.834000(PDBName=O,ResName=WAT,ResNum=639) 0 -13.872582 -1.348535 -  
1.414819 H  
H-HW-0.417000(PDBName=H1,ResName=WAT,ResNum=639) 0 -13.560203 -0.347963 -  
1.484228 H

H-HW-0.417000(PDBName=H2,ResName=WAT,ResNum=639) 0 -13.737500 -1.565471 -  
0.476015 H
